# Supplementary material for: A new emu genome illuminates the evolution of genome configuration and nuclear architecture of avian chromosomes
Source: HighWire-hosted journal article supplement (doi:10.1101/gr.271569.120), 2021-01-06
Supplement: Supplemental_Table_S1.xlsx [file Supplemental_Table_S1.xlsx]

## Sheet: Supplemental_Table_S1
Supplemental Table 1. Chromosome anchoring
Chr	Total length	Gap number
All	1263065591	512
1	216272475	36
2	165000027	26
3	129390489	32
4	84451203	23
4a	24535566	8
5	72167472	18
6	42478111	15
7	45385597	9
8	37329370	3
9	31519428	10
10	25660581	1
11	25096210	7
12	26098356	10
13	23196095	0
14	21258579	4
15	17715720	2
17	13331648	0
18	14766229	5
19	13299004	0
20	18556269	7
21	10049533	9
22	5568188	2
23	8892990	3
24	8478814	4
25	3435794	5
26	7517663	3
27	6867657	9
28	6370545	3
33	3405774	7
Z	82723677	12
W	8373266	27
Unplaced	57361160	212
