# Supplementary material for: A new emu genome illuminates the evolution of genome configuration and nuclear architecture of avian chromosomes
Source: HighWire-hosted journal article supplement (doi:10.1101/gr.271569.120), 2021-01-06
Supplement: Supplemental_Table_S2.xlsx [file Supplemental_Table_S2.xlsx]

## Sheet: Supplemental_Table_S2
Supplemental Table 2. Chromosome centromere position
Chr	Length (bp)	Centromere_unit (bp)	Start	End
1	216272475	NA	131560000	131600000
2	165000027	81	73184739	73203710
3	129390489	65	21600000	21640000
4	84451203	NA	79680000	79760000
4a	24535566	65	409484	466106
5	72167472	65	0	45372
6	42478111	65	17438903	17443184
7	45385597	NA	45360000	45385597
8	37329370	NA	37320000	37329370
9	31519428	65	0	120656
10	25660581	65	0	40000
11	25096210	65	0	107586
12	26098356	65	0	86880
13	23196095	65	0	79051
14	21258579	65	21226954	21258579
15	17715720	65	0	74866
17	13331648	NA	NA	NA
18	14766229	65	14496386	14766229
19	13299004	65	13296996	13299004
20	18556269	65	17440285	17450350
21	10049533	NA	0	40000
22	5568188	NA	5528188	5568188
23	8892990	65	93639	238508
24	8478814	65	0	40000
25	3435794	81	0	17655
26	7517663	NA	0	40000
27	6867657	81	0	19565
28	6370545	NA	NA	NA
33	3405774	NA	0	40000
Z	82723677	NA	NA	NA
W	8373266	NA	NA	NA
