# Supplementary material for: A new emu genome illuminates the evolution of genome configuration and nuclear architecture of avian chromosomes
Source: HighWire-hosted journal article supplement (doi:10.1101/gr.271569.120), 2021-01-06
Supplement: Supplemental_Table_S3.xlsx [file Supplemental_Table_S3.xlsx]

## Sheet: Supplemental_Table_S3
Supplemental Table 3. RNA-seq data used in this study
Acc number	Tissue	Sex	Stage
SRR7026357	Brain	F_1	Adult
SRR7026355	Brain	F_2	Adult
SRR7026352	Brain	F_3	Adult
SRR7026356	Brain	M_1	Adult
SRR7026354	Brain	M_2	Adult
SRR7026351	Brain	M_3	Adult
SRR7026350	Spleen	F_1	Adult
SRR7026349	Spleen	F_2	Adult
SRR7026368	Spleen	F_3	Adult
SRR7026353	Spleen	M_1	Adult
SRR7026348	Spleen	M_2	Adult
SRR7026369	Spleen	M_3	Adult
SRR7026362	Testis	M_1	Adult
SRR7026358	Testis	M_2	Adult
SRR7026361	Testis	M_3	Adult
SRR7026360	Ovary	F_1	Adult
SRR7026359	Ovary	F_2	Adult
SRR7026363	Ovary	F_3	Adult
SRR6713511	Liver	F	Adult
SRR787599	Brain	F_1	Emb_15days
SRR787600	Brain	F_2	Emb_15days
SRR787601	Brain	F_3	Emb_42days
SRR787602	Brain	M_1	Emb_15days
SRR787603	Brain	M_2	Emb_15days
SRR787604	Brain	M_3	Emb_42days
