# Supplementary material for: A new emu genome illuminates the evolution of genome configuration and nuclear architecture of avian chromosomes
Source: HighWire-hosted journal article supplement (doi:10.1101/gr.271569.120), 2021-01-06
Supplement: Supplemental_Table_S4.xlsx [file Supplemental_Table_S4.xlsx]

## Sheet: Supplemental_Table_S4
Supplemental Table 4. Information of chromosome-level assemblies
Species	Name	Source	Sequencing technology	HiC sample	Links
Green sea turtle	Chelonia mydas	DNA Zoo	Illumina+HiC	Blood	https://www.dnazoo.org/assemblies/Chelonia_mydas
Common ostrich	Struthio camelus	DNA Zoo	Illumina+HiC	Blood	https://www.dnazoo.org/assemblies/Struthio_camelus
Greater rhea	Rhea americana	DNA Zoo	Illumina+HiC	Blood	https://www.dnazoo.org/assemblies/Rhea_americana
Southern cassowary	Casuarius casuarius	DNA Zoo	Illumina+HiC	Blood	https://www.dnazoo.org/assemblies/Casuarius_casuarius
Emu	Dromaius novaehollandiae	In this research	Pacbio+10x+HiC	Liver	-
Emu	Dromaius novaehollandiae	DNA Zoo	Illumina+HiC	Blood	https://www.dnazoo.org/assemblies/Dromaius_novaehollandiae
Pekin duck	Anas Domesticus	Li, J, et.al	Pacbio+11x+HiC+Bionano	Liver	-
Greater prairie chicken	Tympanuchus cupido	DNA Zoo	Illumina+HiC	Blood	https://www.dnazoo.org/assemblies/Tympanuchus_cupido
Chicken	Gallus gallus	NCBI	Pacbio	-	https://www.ncbi.nlm.nih.gov/assembly/GCF_000002315.6
Band-tailed pigeon	Patagioenas fasciata	DNA Zoo	Illumina+HiC	-	https://www.dnazoo.org/assemblies/Patagioenas_fasciata
Double-crested cormorant	Phalacrocorax auritus	DNA Zoo	Illumina+HiC	Blood	https://www.dnazoo.org/assemblies/Phalacrocorax_auritus
Spotted owl	Strix occidentalis	DNA Zoo	Illumina+HiC	-	https://www.dnazoo.org/assemblies/Strix_occidentalis
Golden eagle	Aquila chrysaetos	DNA Zoo	Illumina+HiC	Blood	https://www.dnazoo.org/assemblies/Aquila_chrysaetos
California condor	Gymnogyps californianus	DNA Zoo	Illumina+HiC	Blood	https://www.dnazoo.org/assemblies/Gymnogyps_californianus
