# Supplementary material for: A new emu genome illuminates the evolution of genome configuration and nuclear architecture of avian chromosomes
Source: HighWire-hosted journal article supplement (doi:10.1101/gr.271569.120), 2021-01-06
Supplement: Supplemental_Table_S5.xlsx [file Supplemental_Table_S5.xlsx]

## Sheet: Supplemental_Table_S5
Supplemental Table 5. Chromosome name convert
Species	HiC_scaffold	Chr_name	Length
CaliforniaCondor	HiC_scaffold_1	1	219006665
CaliforniaCondor	HiC_scaffold_2	2	168214289
CaliforniaCondor	HiC_scaffold_3	3	128157954
CaliforniaCondor	HiC_scaffold_4	4	85534282
CaliforniaCondor	HiC_scaffold_6	5	72274610
CaliforniaCondor	HiC_scaffold_8	6	41967909
CaliforniaCondor	HiC_scaffold_7	7	45031024
CaliforniaCondor	HiC_scaffold_9	8	37084468
CaliforniaCondor	HiC_scaffold_10	9	30177210
CaliforniaCondor	HiC_scaffold_13	10	24679327
CaliforniaCondor	HiC_scaffold_14	11	23808727
CaliforniaCondor	HiC_scaffold_12	12	24950057
CaliforniaCondor	HiC_scaffold_15	13	22119428
CaliforniaCondor	HiC_scaffold_16	14	19636776
CaliforniaCondor	HiC_scaffold_18	15	17146250
CaliforniaCondor	HiC_scaffold_21	17	13056196
CaliforniaCondor	HiC_scaffold_19	18	14292917
CaliforniaCondor	HiC_scaffold_20	19	13139568
CaliforniaCondor	HiC_scaffold_17	20	17757371
CaliforniaCondor	HiC_scaffold_22	21	9638944
CaliforniaCondor	HiC_scaffold_28	22	5869166
CaliforniaCondor	HiC_scaffold_23	23	8298522
CaliforniaCondor	HiC_scaffold_24	24	7973488
CaliforniaCondor	HiC_scaffold_30	25	2937316
CaliforniaCondor	HiC_scaffold_26	26	7639930
CaliforniaCondor	HiC_scaffold_25	27	7839570
CaliforniaCondor	HiC_scaffold_27	28	6129311
CaliforniaCondor	HiC_scaffold_40	30	644554
CaliforniaCondor	HiC_scaffold_38	31	741914
CaliforniaCondor	HiC_scaffold_32	33	1971263
CaliforniaCondor	HiC_scaffold_11	4a	25103790
CaliforniaCondor	HiC_scaffold_5	Z	85346818
Cassowary	HiC_scaffold_1	1	215234890
Cassowary	HiC_scaffold_2	2	164856657
Cassowary	HiC_scaffold_3	3	128504513
Cassowary	HiC_scaffold_4	4	83871215
Cassowary	HiC_scaffold_6	5	71399266
Cassowary	HiC_scaffold_8	6	42037547
Cassowary	HiC_scaffold_7	7	45010221
Cassowary	HiC_scaffold_9	8	37043263
Cassowary	HiC_scaffold_10	9	31307221
Cassowary	HiC_scaffold_12	10	25634199
Cassowary	HiC_scaffold_14	11	24710657
Cassowary	HiC_scaffold_11	12	25799523
Cassowary	HiC_scaffold_15	13	22875997
Cassowary	HiC_scaffold_16	14	20924447
Cassowary	HiC_scaffold_18	15	17651822
Cassowary	HiC_scaffold_33	16	865125
Cassowary	HiC_scaffold_20	17	13322135
Cassowary	HiC_scaffold_19	18	14423266
Cassowary	HiC_scaffold_21	19	13308375
Cassowary	HiC_scaffold_17	20	18266620
Cassowary	HiC_scaffold_22	21	9731705
Cassowary	HiC_scaffold_28	22	5957571
Cassowary	HiC_scaffold_23	23	8473662
Cassowary	HiC_scaffold_24	24	8356387
Cassowary	HiC_scaffold_29	25	3317208
Cassowary	HiC_scaffold_25	26	7435699
Cassowary	HiC_scaffold_27	27	6218030
Cassowary	HiC_scaffold_26	28	6274882
Cassowary	HiC_scaffold_32	30	1235459
Cassowary	HiC_scaffold_34	31	734460
Cassowary	HiC_scaffold_31	32	1253047
Cassowary	HiC_scaffold_30	33	3083015
Cassowary	HiC_scaffold_13	4a	25197475
Cassowary	HiC_scaffold_5	Z	83019250
Cormorant	HiC_scaffold_26	1	220163567
Cormorant	HiC_scaffold_1	2	169071903
Cormorant	HiC_scaffold_25	3	127544462
Cormorant	HiC_scaffold_23	5	56183610
Cormorant	HiC_scaffold_3	7	71536248
Cormorant	HiC_scaffold_24	8	62588409
Cormorant	HiC_scaffold_22	9	55424786
Cormorant	HiC_scaffold_4	10	46711434
Cormorant	HiC_scaffold_21	11	26678942
Cormorant	HiC_scaffold_65	12	1074074
Cormorant	HiC_scaffold_9	13	13229173
Cormorant	HiC_scaffold_8	14	14476761
Cormorant	HiC_scaffold_13	15	13392273
Cormorant	HiC_scaffold_20	16	17885217
Cormorant	HiC_scaffold_14	17	9862932
Cormorant	HiC_scaffold_11	18	6495805
Cormorant	HiC_scaffold_15	19	8631650
Cormorant	HiC_scaffold_10	20	8342464
Cormorant	HiC_scaffold_18	21	3471175
Cormorant	HiC_scaffold_16	22	7797840
Cormorant	HiC_scaffold_12	23	7073277
Cormorant	HiC_scaffold_28	24	22056369
Cormorant	HiC_scaffold_29	25	3771967
Cormorant	HiC_scaffold_67	26	1351168
Cormorant	HiC_scaffold_17	27	1523080
Cormorant	HiC_scaffold_19	28	3086107
Cormorant	HiC_scaffold_5	4A	24672512
Cormorant	HiC_scaffold_2	4B	84962034
Cormorant	HiC_scaffold_6	6A	18024208
Cormorant	HiC_scaffold_7	6B	24123333
Cormorant	HiC_scaffold_27	Z	85550136
GreaterPrairie	HiC_scaffold_27	1	185320317
GreaterPrairie	HiC_scaffold_1	3	107231568
GreaterPrairie	HiC_scaffold_5	5	57830225
GreaterPrairie	HiC_scaffold_26	6	62763495
GreaterPrairie	HiC_scaffold_25	7	35837998
GreaterPrairie	HiC_scaffold_6	9	22992517
GreaterPrairie	HiC_scaffold_23	10	19409630
GreaterPrairie	HiC_scaffold_7	11	18890548
GreaterPrairie	HiC_scaffold_22	12	19215104
GreaterPrairie	HiC_scaffold_8	13	17123016
GreaterPrairie	HiC_scaffold_21	14	14661516
GreaterPrairie	HiC_scaffold_11	15	12483894
GreaterPrairie	HiC_scaffold_35	16	125827
GreaterPrairie	HiC_scaffold_10	17	10009223
GreaterPrairie	HiC_scaffold_12	18	10450178
GreaterPrairie	HiC_scaffold_13	19	9716037
GreaterPrairie	HiC_scaffold_9	20	13457897
GreaterPrairie	HiC_scaffold_18	21	6599446
GreaterPrairie	HiC_scaffold_20	22	4044071
GreaterPrairie	HiC_scaffold_15	23	5552472
GreaterPrairie	HiC_scaffold_19	24	6198043
GreaterPrairie	HiC_scaffold_34	25	1656198
GreaterPrairie	HiC_scaffold_16	26	5080967
GreaterPrairie	HiC_scaffold_17	27	4318199
GreaterPrairie	HiC_scaffold_14	28	4421375
GreaterPrairie	HiC_scaffold_33	33	1551916
GreaterPrairie	HiC_scaffold_28	2A	49833193
GreaterPrairie	HiC_scaffold_2	2B	90372862
GreaterPrairie	HiC_scaffold_24	4A	18786984
GreaterPrairie	HiC_scaffold_4	4B	68568989
GreaterPrairie	HiC_scaffold_3	Z	71605167
GreaterRhea	HiC_scaffold_31	1	212294856
GreaterRhea	HiC_scaffold_2	2	161770042
GreaterRhea	HiC_scaffold_6	3	126853929
GreaterRhea	HiC_scaffold_3	4	80688299
GreaterRhea	HiC_scaffold_30	5	69224556
GreaterRhea	HiC_scaffold_29	6	40122881
GreaterRhea	HiC_scaffold_5	7	43122669
GreaterRhea	HiC_scaffold_27	8	35777221
GreaterRhea	HiC_scaffold_25	9	29910934
GreaterRhea	HiC_scaffold_26	10	24624033
GreaterRhea	HiC_scaffold_28	11	23455514
GreaterRhea	HiC_scaffold_24	12	24596671
GreaterRhea	HiC_scaffold_7	13	22135346
GreaterRhea	HiC_scaffold_9	14	19624805
GreaterRhea	HiC_scaffold_8	15	16882234
GreaterRhea	HiC_scaffold_34	16	419403
GreaterRhea	HiC_scaffold_18	17	13128898
GreaterRhea	HiC_scaffold_19	18	13802169
GreaterRhea	HiC_scaffold_10	19	12812575
GreaterRhea	HiC_scaffold_22	20	17693164
GreaterRhea	HiC_scaffold_17	21	9000849
GreaterRhea	HiC_scaffold_21	22	5463505
GreaterRhea	HiC_scaffold_16	23	8268599
GreaterRhea	HiC_scaffold_20	24	8195719
GreaterRhea	HiC_scaffold_12	25	3193995
GreaterRhea	HiC_scaffold_4	26	7452025
GreaterRhea	HiC_scaffold_15	27	6498333
GreaterRhea	HiC_scaffold_14	28	6044554
GreaterRhea	HiC_scaffold_11	30	998907
GreaterRhea	HiC_scaffold_32	31	770990
GreaterRhea	HiC_scaffold_35	32	764903
GreaterRhea	HiC_scaffold_13	33	2850818
GreaterRhea	HiC_scaffold_23	4a	24167449
GreaterRhea	HiC_scaffold_1	Z	80041105
Ostrich	HiC_scaffold_1	1	217812612
Ostrich	HiC_scaffold_2	2	166992445
Ostrich	HiC_scaffold_3	3	130590675
Ostrich	HiC_scaffold_4	4	84338013
Ostrich	HiC_scaffold_7	5	72210294
Ostrich	HiC_scaffold_9	6	42582980
Ostrich	HiC_scaffold_8	7	45399965
Ostrich	HiC_scaffold_10	8	37910017
Ostrich	HiC_scaffold_11	9	31795546
Ostrich	HiC_scaffold_12	10	25971462
Ostrich	HiC_scaffold_15	11	24845632
Ostrich	HiC_scaffold_13	12	25874307
Ostrich	HiC_scaffold_16	13	23499767
Ostrich	HiC_scaffold_17	14	21088184
Ostrich	HiC_scaffold_19	15	17942952
Ostrich	HiC_scaffold_34	16	749920
Ostrich	HiC_scaffold_21	17	13832263
Ostrich	HiC_scaffold_20	18	14958512
Ostrich	HiC_scaffold_22	19	13756983
Ostrich	HiC_scaffold_18	20	18612843
Ostrich	HiC_scaffold_23	21	10201238
Ostrich	HiC_scaffold_29	22	6100697
Ostrich	HiC_scaffold_25	23	8672696
Ostrich	HiC_scaffold_24	24	8871697
Ostrich	HiC_scaffold_30	25	3486135
Ostrich	HiC_scaffold_26	26	7817357
Ostrich	HiC_scaffold_28	27	6594952
Ostrich	HiC_scaffold_27	28	6633492
Ostrich	HiC_scaffold_33	30	1065872
Ostrich	HiC_scaffold_35	31	731125
Ostrich	HiC_scaffold_31	33	3079645
Ostrich	HiC_scaffold_14	4a	25738570
Ostrich	HiC_scaffold_5	W	12337726
Ostrich	HiC_scaffold_6	Z	83444685
Owl	HiC_scaffold_1	2	169232219
Owl	HiC_scaffold_4	3	128588177
Owl	HiC_scaffold_8	6	41565584
Owl	HiC_scaffold_7	7	44338278
Owl	HiC_scaffold_9	8	36656711
Owl	HiC_scaffold_10	9	30097849
Owl	HiC_scaffold_13	10	24132494
Owl	HiC_scaffold_14	11	23892810
Owl	HiC_scaffold_11	12	24811943
Owl	HiC_scaffold_15	13	21957357
Owl	HiC_scaffold_18	14	19280592
Owl	HiC_scaffold_20	15	16842477
Owl	HiC_scaffold_23	17	12935086
Owl	HiC_scaffold_21	18	14201009
Owl	HiC_scaffold_22	19	12996793
Owl	HiC_scaffold_19	20	17728074
Owl	HiC_scaffold_25	21	9764254
Owl	HiC_scaffold_24	22	10577004
Owl	HiC_scaffold_27	23	8131076
Owl	HiC_scaffold_26	24	8180238
Owl	HiC_scaffold_31	25	3135070
Owl	HiC_scaffold_28	26	7519457
Owl	HiC_scaffold_29	27	6979367
Owl	HiC_scaffold_30	28	6248237
Owl	HiC_scaffold_33	30	962029
Owl	HiC_scaffold_32	33	2852617
Owl	HiC_scaffold_2	1A	134764634
Owl	HiC_scaffold_6	1B	87409211
Owl	HiC_scaffold_12	4A	24219298
Owl	HiC_scaffold_16	5B	21044958
Owl	HiC_scaffold_3	5C	130775863
Owl	HiC_scaffold_17	W	20706824
Owl	HiC_scaffold_5	Z	89538267
Pigeon	HiC_scaffold_1	1	205510306
Pigeon	HiC_scaffold_2	2	157166770
Pigeon	HiC_scaffold_3	3	117214671
Pigeon	HiC_scaffold_5	4	75366177
Pigeon	HiC_scaffold_6	5	66896167
Pigeon	HiC_scaffold_8	6	37860466
Pigeon	HiC_scaffold_7	7	39534137
Pigeon	HiC_scaffold_9	8	32469999
Pigeon	HiC_scaffold_10	9	26560337
Pigeon	HiC_scaffold_12	10	21065616
Pigeon	HiC_scaffold_14	11	20716055
Pigeon	HiC_scaffold_11	12	21829948
Pigeon	HiC_scaffold_15	13	19177021
Pigeon	HiC_scaffold_16	14	16763932
Pigeon	HiC_scaffold_18	15	13961864
Pigeon	HiC_scaffold_34	16	167355
Pigeon	HiC_scaffold_20	17	10997106
Pigeon	HiC_scaffold_19	18	11361449
Pigeon	HiC_scaffold_21	19	10252728
Pigeon	HiC_scaffold_17	20	14726480
Pigeon	HiC_scaffold_22	21	7012735
Pigeon	HiC_scaffold_28	22	4433014
Pigeon	HiC_scaffold_25	23	5607113
Pigeon	HiC_scaffold_24	24	5675082
Pigeon	HiC_scaffold_29	25	2019295
Pigeon	HiC_scaffold_23	26	5841358
Pigeon	HiC_scaffold_26	27	5091844
Pigeon	HiC_scaffold_27	28	4504171
Pigeon	HiC_scaffold_32	30	502877
Pigeon	HiC_scaffold_33	32	262499
Pigeon	HiC_scaffold_30	33	1962286
Pigeon	HiC_scaffold_13	4a	20908936
Pigeon	HiC_scaffold_4	Z	76042635
Sea_turtle	HiC_scaffold_1	1	344580086
Sea_turtle	HiC_scaffold_2	2	265960234
Sea_turtle	HiC_scaffold_17	3	206018961
Sea_turtle	HiC_scaffold_24	4	140825401
Sea_turtle	HiC_scaffold_25	5	102862947
Sea_turtle	HiC_scaffold_20	6	127535543
Sea_turtle	HiC_scaffold_3	7	125259731
Sea_turtle	HiC_scaffold_19	8	78168177
Sea_turtle	HiC_scaffold_4	9	107487999
Sea_turtle	HiC_scaffold_23	10	85189569
Sea_turtle	HiC_scaffold_11	11	42804224
Sea_turtle	HiC_scaffold_22	12	33173454
Sea_turtle	HiC_scaffold_26	13	26159407
Sea_turtle	HiC_scaffold_5	14	39009518
Sea_turtle	HiC_scaffold_7	15	25598500
Sea_turtle	HiC_scaffold_10	16	39090782
Sea_turtle	HiC_scaffold_15	17	23668442
Sea_turtle	HiC_scaffold_9	18	16544897
Sea_turtle	HiC_scaffold_14	19	19940459
Sea_turtle	HiC_scaffold_12	20	19221767
Sea_turtle	HiC_scaffold_6	21	17094346
Sea_turtle	HiC_scaffold_16	22	18802053
Sea_turtle	HiC_scaffold_8	23	16464228
Sea_turtle	HiC_scaffold_13	24	16651426
Sea_turtle	HiC_scaffold_18	25	133491730
