# Supplementary material for: A new emu genome illuminates the evolution of genome configuration and nuclear architecture of avian chromosomes
Source: HighWire-hosted journal article supplement (doi:10.1101/gr.271569.120), 2021-01-06
Supplement: Supplemental_Table_S6.xlsx [file Supplemental_Table_S6.xlsx]

## Sheet: Supplemental_Table_S6
Supplemental Table 6. Genomic rearrangements of birds
Turtle_chr	t_start	t_end	q_species	q_chr	q_start	q_end	t_len	q_len	strand	sv	Emu_chr
1	2657	5191993	Ostrich	1	217037368	217804212	5189337	766845	-1	Normal	1
1	5390006	5498818	Ostrich	1	216898146	216952024	108813	53879	1	INV	1
1	5917999	17750494	Ostrich	1	210886487	216856802	11832496	5970316	-1	Normal	1
1	17759918	20223242	Ostrich	1	209229576	210867706	2463325	1638131	1	INV	1
1	20270564	140812088	Ostrich	1	129194833	209199215	120541525	80004383	-1	Normal	1
1	140966374	141030624	Ostrich	1	129045417	129097316	64251	51900	1	INV	1
1	141121359	206409560	Ostrich	1	86052786	128956026	65288202	42903241	-1	Normal	1
1	206477044	206588995	Ostrich	1	85962504	86031776	111952	69273	1	INV	1
1	206681498	207170214	Ostrich	1	85641993	85900059	488717	258067	1	INV	1
1	207494384	207799438	Ostrich	1	85392280	85552262	305055	159983	-1	Normal	1
1	208829841	208935221	Ostrich	1	83601737	83653114	105381	51378	1	INV_TRANS	1
1	210536107	212205442	Ostrich	1	84018039	84863726	1669336	845688	-1	Normal	1
1	212609160	212763276	Ostrich	1	83787214	83888411	154117	101198	1	INV	1
1	212889793	326083513	Ostrich	1	9994466	83375669	113193721	73381204	-1	Normal	1
1	326092753	326831054	Ostrich	1	9415409	9991362	738302	575954	1	INV	1
1	327032261	339957451	Ostrich	1	1302034	9400504	12925191	8098471	-1	Normal	1
1	340511527	340854363	Ostrich	1	1097443	1199190	342837	101748	1	INV	1
1	341172931	341954502	Ostrich	1	659273	1042829	781572	383557	1	INV	1
1	343279087	344388234	Ostrich	1	66741	549153	1109148	482413	-1	Normal	1
2	153102	32666040	Ostrich	2	12684	19743047	32512939	19730364	1	Normal	2
2	32735709	48438475	Ostrich	2	19782607	29614500	15702767	9831894	-1	INV	2
2	48623168	75137392	Ostrich	2	29733318	47414807	26514225	17681490	-1	INV	2
2	75396095	100541986	Ostrich	2	47563264	64527861	25145892	16964598	1	Normal	2
2	100860808	119531500	Ostrich	2	64852258	77840698	18670693	12988441	-1	INV	2
2	119775229	143544424	Ostrich	2	77878191	91421243	23769196	13543053	1	Normal	2
2	143790987	153127702	Ostrich	2	91943973	96761497	9336716	4817525	-1	INV	2
2	153329781	153418628	Ostrich	2	91865190	91924206	88848	59017	1	TRANS	2
2	154053725	251387160	Ostrich	2	96790476	160051839	97333436	63261364	1	Normal	2
2	251562549	265958139	Ostrich	2	160046383	166974175	14395591	6927793	1	Normal	2
3	1030522	1165204	Ostrich	3	4518106	4600039	134683	81934	1	TRANS	3
3	1284119	1412260	Ostrich	3	348402	419821	128142	71420	1	Normal	3
3	1510439	1949438	Ostrich	3	685171	995301	439000	310131	1	Normal	3
3	2084704	2800556	Ostrich	3	3563532	3887132	715853	323601	1	TRANS	3
3	3013223	3545434	Ostrich	3	41711	280652	532212	238942	-1	INV_TRANS	3
3	3714731	3782016	Ostrich	3	551529	607223	67286	55695	-1	INV_TRANS	3
3	3810759	4163555	Ostrich	3	4229278	4442053	352797	212776	-1	INV_TRANS	3
3	4289587	6562207	Ostrich	3	1692431	3325062	2272621	1632632	1	Normal	3
3	6770088	6976896	Ostrich	3	1249845	1379860	206809	130016	-1	INV_TRANS	3
3	7740035	8036356	Ostrich	3	4634075	4808587	296322	174513	1	Normal	3
3	8041672	12841761	Ostrich	3	11837336	15147934	4800090	3310599	1	Normal	3
3	12990971	14679397	Ostrich	3	7651120	8790405	1688427	1139286	1	TRANS	3
3	14715625	18992388	Ostrich	3	4821438	7510624	4276764	2689187	1	TRANS	3
3	19510743	20101708	Ostrich	3	8798246	9090398	590966	292153	-1	INV_TRANS	3
3	20115985	24343429	Ostrich	3	9256807	11821747	4227445	2564941	-1	INV_TRANS	3
3	24429886	26064873	Ostrich	3	21858036	22487486	1634988	629451	-1	INV_TRANS	3
3	26140122	32141940	Ostrich	3	18629814	21780864	6001819	3151051	1	Normal	3
3	32755882	48706773	Ostrich	3	22535172	32766372	15950892	10231201	-1	INV	3
3	48906931	54626678	Ostrich	3	15166850	18368254	5719748	3201405	1	TRANS	3
3	54650553	74234901	Ostrich	3	32856785	45641642	19584349	12784858	1	Normal	3
3	74384383	82154914	Ostrich	3	45697373	51017623	7770532	5320251	-1	INV	3
3	82322850	88323478	Ostrich	3	51154827	55234862	6000629	4080036	1	Normal	3
3	88472076	99312048	Ostrich	3	55334525	62578574	10839973	7244050	-1	INV	3
3	99446144	106963704	Ostrich	3	62665655	67798508	7517561	5132854	1	Normal	3
3	107026448	205891432	Ostrich	3	67794246	130581386	98864985	62787141	1	Normal	3
4	1681951	2022472	Ostrich	4	2971783	3093014	340522	121232	1	TRANS	4
4	2693133	6876945	Ostrich	4	20715	2194328	4183813	2173614	-1	INV	4
4	7059617	9431674	Ostrich	4	3135545	4451672	2372058	1316128	1	Normal	4
4	9767529	9899427	Ostrich	4	6704956	6776124	131899	71169	1	TRANS	4
4	10404112	13898173	Ostrich	4	4505549	6573894	3494062	2068346	-1	INV	4
4	14117612	15528727	Ostrich	4	6794252	7652854	1411116	858603	-1	INV	4
4	15635802	16495392	Ostrich	4	7850090	8232673	859591	382584	1	Normal	4
4	16604844	17376991	Ostrich	4	9473427	10024702	772148	551276	1	TRANS	4
4	17396406	17573872	Ostrich	4	10127752	10236103	177467	108352	-1	INV_TRANS	4
4	17880009	19417937	Ostrich	4	8365668	9423426	1537929	1057759	1	Normal	4
4	19462802	26090381	Ostrich	4	10261490	14627530	6627580	4366041	1	Normal	4
4	26143356	43164972	Ostrich	4	14666054	25809964	17021617	11143911	-1	INV	4
4	43251942	140817766	Ostrich	4	25824157	84333495	97565825	58509339	1	Normal	4
5	56323363	57476470	Ostrich	4a	1456124	1878085	1153108	421962	1	TRANS	4a
5	57531994	57766219	Ostrich	4a	22006929	22097497	234226	90569	-1	INV_TRANS	4a
5	57961906	58671045	Ostrich	4a	2088479	2260020	709140	171542	1	TRANS	4a
5	59621417	61102993	Ostrich	4a	231443	760189	1481577	528747	-1	INV	4a
5	61316833	62076790	Ostrich	4a	1067152	1416701	759958	349550	-1	INV	4a
5	62863257	63691917	Ostrich	4a	12703388	13184653	828661	481266	1	TRANS	4a
5	63697901	64451914	Ostrich	4a	22138008	22381185	754014	243178	-1	INV_TRANS	4a
5	64697997	74108258	Ostrich	4a	13208036	18118478	9410262	4910443	-1	INV_TRANS	4a
5	74201947	79799500	Ostrich	4a	22410600	25707832	5597554	3297233	1	TRANS	4a
5	79907404	95570767	Ostrich	4a	2290129	12635468	15663364	10345340	1	Normal	4a
5	95643674	102860652	Ostrich	4a	18223410	21995847	7216979	3772438	1	Normal	4a
5	33314	19928496	Ostrich	9	4224870	16429680	19895183	12204811	-1	TRANS	9
5	19980379	20089985	Ostrich	9	4148783	4206615	109607	57833	1	INV_TRANS	9
5	20115545	28543604	Ostrich	9	8572	4121912	8428060	4113341	-1	TRANS	9
5	28597332	49432049	Ostrich	9	16451668	29086483	20834718	12634816	1	INV	9
5	49504531	49765832	Ostrich	9	30911075	31031404	261302	120330	-1	TRANS	9
5	49807596	50510465	Ostrich	9	30682598	30885257	702870	202660	1	INV_TRANS	9
5	50542198	52915746	Ostrich	9	29094736	30146311	2373549	1051576	-1	TRANS	9
5	52998221	54600843	Ostrich	9	31073077	31720597	1602623	647521	1	INV_TRANS	9
5	54628796	56131458	Ostrich	9	30182864	30654300	1502663	471437	-1	TRANS	9
6	636245	60841524	Ostrich	5	199851	37326276	60205280	37126426	1	Normal	5
6	60856984	62013980	Ostrich	5	70943055	71558907	1156997	615853	-1	INV_TRANS	5
6	62071044	71660161	Ostrich	5	37592848	43697610	9589118	6104763	-1	INV	5
6	72090447	75692417	Ostrich	5	43805711	45989438	3601971	2183728	-1	INV	5
6	75869232	111274455	Ostrich	5	46049656	68239524	35405224	22189869	1	Normal	5
6	111311840	111625688	Ostrich	5	71628378	71819532	313849	191155	-1	INV_TRANS	5
6	111824709	116380762	Ostrich	5	68249951	69709522	4556054	1459572	1	Normal	5
6	116428439	116620390	Ostrich	5	69938598	70044327	191952	105730	1	Normal	5
6	116889603	118982894	Ostrich	5	70205371	70861710	2093292	656340	-1	INV	5
6	119766410	119939847	Ostrich	5	69772793	69846076	173438	73284	1	TRANS	5
6	120700360	120934311	Ostrich	5	71953308	72012300	233952	58993	-1	INV	5
7	52128478	54268193	Ostrich	6	23783658	24896478	2139716	1112821	1	TRANS	6
7	54368738	56338277	Ostrich	6	22516196	23749695	1969540	1233500	1	TRANS	6
7	56399805	59446420	Ostrich	6	20771471	22458141	3046616	1686671	-1	INV_TRANS	6
7	59742024	60610228	Ostrich	6	42197351	42452078	868205	254728	1	TRANS	6
7	60756492	90182357	Ostrich	6	24956028	42046949	29425866	17090922	1	TRANS	6
7	90520513	95938835	Ostrich	6	17389971	20615207	5418323	3225237	-1	INV_TRANS	6
7	96059987	124947988	Ostrich	6	66265	17304215	28888002	17237951	1	Normal	6
7	185258	8935930	Ostrich	12	11301051	16313228	8750673	5012178	-1	TRANS	12
7	8973113	19752705	Ostrich	12	19126567	25865181	10779593	6738615	1	INV	12
7	19792256	23847567	Ostrich	12	16387812	19113920	4055312	2726109	1	INV	12
7	24005397	41319781	Ostrich	12	4148152	11246223	17314385	7098072	-1	Normal	12
7	41693101	43133655	Ostrich	12	2357276	3043896	1440555	686621	1	INV_TRANS	12
7	43222277	44456855	Ostrich	12	3252931	3984693	1234579	731763	-1	Normal	12
7	44583982	45960908	Ostrich	12	10673	692065	1376927	681393	1	INV	12
7	46502920	46713613	Ostrich	12	3051115	3175491	210694	124377	1	INV_TRANS	12
7	46916750	47824869	Ostrich	12	1859427	2293872	908120	434446	1	INV_TRANS	12
7	48538994	49099465	Ostrich	12	1389665	1512961	560472	123297	1	INV_TRANS	12
7	49111264	51263080	Ostrich	12	716667	1245989	2151817	529323	1	INV_TRANS	12
7	51455671	51800907	Ostrich	12	1712800	1837213	345237	124414	1	INV_TRANS	12
8	573296	1836515	Ostrich	7	42846393	43391636	1263220	545244	-1	INV_TRANS	7
8	2041984	2587723	Ostrich	7	43462476	43662290	545740	199815	1	TRANS	7
8	3697805	5602232	Ostrich	7	44262365	45307423	1904428	1045059	1	TRANS	7
8	6426636	6646278	Ostrich	7	43864060	43998011	219643	133952	-1	INV_TRANS	7
8	7215883	14539796	Ostrich	7	38521115	42516994	7323914	3995880	-1	INV_TRANS	7
8	14715803	17778186	Ostrich	7	36544656	38440104	3062384	1895449	1	TRANS	7
8	17826019	45235401	Ostrich	7	19281511	36509561	27409383	17228051	-1	INV_TRANS	7
8	45281801	78168114	Ostrich	7	10047	19270883	32886314	19260837	1	Normal	7
9	2977	24124133	Ostrich	8	7689	13872043	24121157	13864355	-1	Normal	8
9	24195847	30284124	Ostrich	8	13912026	17923992	6088278	4011967	1	INV_TRANS	8
9	30356011	47549581	Ostrich	8	17922629	28507005	17193571	10584377	1	INV_TRANS	8
9	47663013	53809723	Ostrich	8	33959806	37761253	6146711	3801448	-1	TRANS	8
9	53872489	59368230	Ostrich	8	31305968	33934781	5495742	2628814	1	INV_TRANS	8
9	59448932	65887303	Ostrich	8	28812561	31257438	6438372	2444878	-1	TRANS	8
9	67745795	70669519	Ostrich	13	21348888	22374904	2923725	1026017	1	INV	13
9	70733412	72359084	Ostrich	13	22526912	23388471	1625673	861560	-1	TRANS	13
9	72712722	85416637	Ostrich	13	13460547	21112462	12703916	7651916	-1	Normal	13
9	85523792	88486261	Ostrich	13	7419922	9500484	2962470	2080563	1	INV	13
9	88569221	100691777	Ostrich	13	283233	7362664	12122557	7079432	1	INV	13
9	100766868	106992877	Ostrich	13	9500892	13352394	6226010	3851503	-1	TRANS	13
9	107004743	107469143	Ostrich	13	28439	234418	464401	205980	-1	Normal	13
10	3272	38819107	Ostrich	10	10042	23385001	38815836	23374960	1	Normal	10
10	39010357	45496318	Ostrich	10	23533344	25883988	6485962	2350645	-1	INV	10
10	46331954	46488297	Ostrich	14	17196432	17257384	156344	60953	-1	TRANS	14
10	46569534	49688393	Ostrich	14	19441596	21002923	3118860	1561328	1	INV	14
10	49804799	54153140	Ostrich	14	17410967	19234580	4348342	1823614	1	INV	14
10	54257174	54502363	Ostrich	14	17293210	17397208	245190	103999	1	INV	14
10	54855361	85087529	Ostrich	14	49543	17185217	30232169	17135675	-1	Normal	14
11	133443	35416234	Ostrich	11	2935551	24791565	35282792	21856015	-1	Normal	11
11	35493498	35938857	Ostrich	11	1194835	1447536	445360	252702	1	INV	11
11	36215080	37125074	Ostrich	11	718579	1117925	909995	399347	-1	Normal	11
11	37261206	37351510	Ostrich	11	1917426	1981395	90305	63970	1	INV_TRANS	11
11	37615183	38149415	Ostrich	11	68931	305142	534233	236212	-1	Normal	11
11	38425089	39091829	Ostrich	11	1501944	1831677	666741	329734	-1	TRANS	11
11	39384247	39450549	Ostrich	11	2451795	2504974	66303	53180	1	INV_TRANS	11
11	39867920	40476752	Ostrich	11	2182300	2431764	608833	249465	-1	TRANS	11
11	41099110	41346140	Ostrich	11	498662	602077	247031	103416	-1	TRANS	11
11	41485748	42672331	Ostrich	11	2543890	2893192	1186584	349303	1	INV_TRANS	11
12	401646	2159192	Ostrich	15	1808012	2256682	1757547	448671	1	TRANS	15
12	3401935	3841486	Ostrich	15	88593	288037	439552	199445	1	Normal	15
12	4042589	5883498	Ostrich	15	347528	1446061	1840910	1098534	-1	INV	15
12	5974214	9003346	Ostrich	15	2302859	4078097	3029133	1775239	-1	INV	15
12	9167337	11717076	Ostrich	15	4124254	5502199	2549740	1377946	1	Normal	15
12	11770694	33156766	Ostrich	15	5488356	17927717	21386073	12439362	1	Normal	15
13	71290	19756177	Ostrich	17	2381758	13807209	19684888	11425452	-1	Normal	17
13	20217188	20754268	Ostrich	17	125488	356343	537081	230856	1	INV_TRANS	17
13	21585631	23352159	Ostrich	17	1113584	1847762	1766529	734179	1	INV	17
13	23504618	24668843	Ostrich	17	500583	1060770	1164226	560188	1	INV	17
13	24903599	25918594	Ostrich	17	1863198	2191292	1014996	328095	-1	TRANS	17
14	43521	18792978	Ostrich	18	25438	10110081	18749458	10084644	1	Normal	18
14	19459666	20559382	Ostrich	18	10215503	10807460	1099717	591958	-1	INV	18
14	20609901	26902573	Ostrich	18	11045431	14888097	6292673	3842667	1	Normal	18
15	43090	11774489	Ostrich	19	386500	6809184	11731400	6422685	-1	Normal	19
15	11855354	12350438	Ostrich	19	100910	363602	495085	262693	1	INV	19
15	12502707	13279330	Ostrich	19	6823192	7244998	776624	421807	1	INV_TRANS	19
15	13284053	21358654	Ostrich	19	7325809	12458991	8074602	5133183	-1	TRANS	19
15	22130710	22710943	Ostrich	19	13202325	13424357	580234	222033	1	INV_TRANS	19
15	23371003	24824923	Ostrich	19	12490280	12995127	1453921	504848	-1	TRANS	19
15	24885025	25516435	Ostrich	19	13515786	13693321	631411	177536	-1	TRANS	19
16	6500532	6777306	Ostrich	20	16922143	17028636	276775	106494	1	INV_TRANS	20
16	6832631	7065653	Ostrich	20	16781293	16910687	233023	129395	-1	TRANS	20
16	7263950	8897891	Ostrich	20	17046120	17782567	1633942	736448	1	INV	20
16	9025629	11075798	Ostrich	20	14880533	15888812	2050170	1008280	1	INV	20
16	11234379	11351128	Ostrich	20	15955851	16032001	116750	76151	-1	TRANS	20
16	11375145	12600938	Ostrich	20	16046581	16719599	1225794	673019	1	INV_TRANS	20
16	12614535	13997393	Ostrich	20	17810461	18543865	1382859	733405	1	INV_TRANS	20
16	14018657	15795593	Ostrich	20	13744119	14842397	1776937	1098279	1	INV	20
16	15836184	39050650	Ostrich	20	18332	13728101	23214467	13709770	-1	Normal	20
17	17765	14338164	Ostrich	21	2112639	9692116	14320400	7579478	1	Normal	21
17	14423640	18367240	Ostrich	21	916075	2091915	3943601	1175841	1	TRANS	21
17	18661042	20381537	Ostrich	21	89329	858119	1720496	768791	1	TRANS	21
17	22375160	23661213	Ostrich	21	9793730	10060489	1286054	266760	-1	INV	21
18	1568859	2015674	Ostrich	22	502561	595102	446816	92542	1	TRANS	22
18	2309010	2778375	Ostrich	22	185441	302625	469366	117185	-1	INV	22
18	3395428	3811562	Ostrich	22	670620	751458	416135	80839	-1	INV	22
18	4435748	4980504	Ostrich	22	1298187	1388236	544757	90050	1	TRANS	22
18	5364578	6237526	Ostrich	22	790381	1282310	872949	491930	-1	INV	22
18	6402050	16495358	Ostrich	22	1425989	6096375	10093309	4670387	1	Normal	22
19	145290	19880461	Ostrich	23	31831	8596699	19735172	8564869	-1	Normal	23
20	1307893	15523371	Ostrich	24	1825545	8753197	14215479	6927653	-1	Normal	24
20	15531356	18409168	Ostrich	24	387700	1818981	2877813	1431282	1	INV	24
20	18432955	18753189	Ostrich	24	245439	382298	320235	136860	-1	Normal	24
20	18797003	19093908	Ostrich	24	58799	238342	296906	179544	1	INV	24
21	5731888	8227483	Ostrich	25	417021	944486	2495596	527466	-1	TRANS	25
21	8577404	9413590	Ostrich	25	8405	366329	836187	357925	1	INV_TRANS	25
21	9919407	12039734	Ostrich	25	1253234	1884693	2120328	631460	1	INV_TRANS	25
21	12248347	14012542	Ostrich	25	1918301	2346617	1764196	428317	-1	TRANS	25
21	14139826	17092967	Ostrich	25	2370788	3458174	2953142	1087387	-1	Normal	25
22	100817	993114	Ostrich	26	7076544	7308675	892298	232132	1	INV	26
22	1398971	2224435	Ostrich	26	6026217	6140922	825465	114706	1	INV_TRANS	26
22	2671695	3625730	Ostrich	26	6558557	7015069	954036	456513	1	INV	26
22	3924665	4273000	Ostrich	26	7378835	7609555	348336	230721	-1	TRANS	26
22	4355120	5003950	Ostrich	26	6217662	6502980	648831	285319	1	INV	26
22	5085956	5239440	Ostrich	26	7686691	7767761	153485	81071	-1	TRANS	26
22	5428873	18553843	Ostrich	26	28186	5954501	13124971	5926316	-1	Normal	26
23	200761	3263784	Ostrich	27	5494000	6578321	3063024	1084322	1	TRANS	27
23	3707080	16446595	Ostrich	27	391942	5451010	12739516	5059069	1	Normal	27
24	45096	7037153	Ostrich	28	4122602	6626646	6992058	2504045	1	INV	28
24	7142032	12502045	Ostrich	28	1832703	4067014	5360014	2234312	-1	Normal	28
24	12554801	13715505	Ostrich	28	13682	430387	1160705	416706	1	INV_TRANS	28
24	13902407	15594497	Ostrich	28	435418	1204766	1692091	769349	-1	Normal	28
24	16037425	16401069	Ostrich	28	1512299	1662126	363645	149828	-1	TRANS	28
25	5956	2935261	Ostrich	Z	70853226	71948113	2929306	1094888	1	INV_TRANS	Z
25	3364714	4178120	Ostrich	Z	72031382	72467488	813407	436107	-1	TRANS	Z
25	4406999	21994526	Ostrich	Z	72553194	83434816	17587528	10881623	1	INV	Z
25	22034449	98444069	Ostrich	Z	22055637	70833791	76409621	48778155	-1	Normal	Z
25	98640858	101002456	Ostrich	Z	5367340	6880380	2361599	1513041	-1	TRANS	Z
25	101178166	104801240	Ostrich	Z	14633186	16958586	3623075	2325401	1	INV_TRANS	Z
25	104813550	104937841	Ostrich	Z	16966748	17042158	124292	75411	-1	TRANS	Z
25	105035570	111198467	Ostrich	Z	17116334	21560635	6162898	4444302	1	INV	Z
25	111898955	113060690	Ostrich	Z	4511578	5290099	1161736	778522	-1	TRANS	Z
25	113413337	113557712	Ostrich	Z	4197060	4292603	144376	95544	1	INV_TRANS	Z
25	113628349	114617942	Ostrich	Z	3491473	4163880	989594	672408	-1	TRANS	Z
25	117473081	120801477	Ostrich	Z	12309935	14486185	3328397	2176251	-1	Normal	Z
25	122800584	124055891	Ostrich	Z	183645	915359	1255308	731715	1	INV_TRANS	Z
25	124870423	125360145	Ostrich	Z	1445606	1691054	489723	245449	-1	TRANS	Z
25	126528390	127886253	Ostrich	Z	7692021	8495661	1357864	803641	-1	TRANS	Z
25	128079035	132050144	Ostrich	Z	8555148	11113361	3971110	2558214	1	INV	Z
25	132351476	133206695	Ostrich	Z	7217917	7620195	855220	402279	-1	Normal	Z
1	107356	17750410	GreaterRhea	1	205766641	212251430	17643055	6484790	-1	Normal	1
1	17767488	20223264	GreaterRhea	1	204103526	205752771	2455777	1649246	1	INV	1
1	20662346	185359464	GreaterRhea	1	96930023	203828426	164697119	106898404	-1	Normal	1
1	185425818	185864887	GreaterRhea	1	94827468	95109443	439070	281976	-1	TRANS	1
1	186064284	188287955	GreaterRhea	1	95284222	96794637	2223672	1510416	-1	Normal	1
1	188593567	206409560	GreaterRhea	1	83875856	94709009	17815994	10833154	-1	Normal	1
1	206477044	206588995	GreaterRhea	1	83788386	83858031	111952	69646	1	INV	1
1	206668351	207170214	GreaterRhea	1	83462553	83729184	501864	266632	1	INV	1
1	207572030	207799438	GreaterRhea	1	83229134	83319684	227409	90551	-1	Normal	1
1	208829845	208935217	GreaterRhea	1	81448295	81499989	105373	51695	1	INV_TRANS	1
1	210323397	212267132	GreaterRhea	1	81836796	82795599	1943736	958804	-1	Normal	1
1	212609160	212763275	GreaterRhea	1	81665546	81753109	154116	87564	1	INV	1
1	212890874	326043161	GreaterRhea	1	9816390	81221908	113152288	71405519	-1	Normal	1
1	326105417	326831019	GreaterRhea	1	9236991	9779305	725603	542315	1	INV	1
1	326994511	340157363	GreaterRhea	1	1315848	9246788	13162853	7930941	-1	Normal	1
1	340533802	340854363	GreaterRhea	1	1170796	1282118	320562	111323	1	INV	1
1	341171557	341954497	GreaterRhea	1	702036	1058658	782941	356623	1	INV	1
1	343191884	344388229	GreaterRhea	1	109117	646983	1196346	537867	-1	Normal	1
2	153105	32664705	GreaterRhea	2	19882	19127425	32511601	19107544	1	Normal	2
2	32710145	48438527	GreaterRhea	2	19168469	28663086	15728383	9494618	-1	INV	2
2	48601614	75123709	GreaterRhea	2	28753963	45923072	26522096	17169110	-1	INV	2
2	75396100	100541988	GreaterRhea	2	46039688	62532333	25145889	16492646	1	Normal	2
2	100860808	119574886	GreaterRhea	2	62794699	75450961	18714079	12656263	-1	INV	2
2	119775229	142883419	GreaterRhea	2	75476454	88497657	23108191	13021204	1	Normal	2
2	143790988	153127027	GreaterRhea	2	89094666	93741591	9336040	4646926	-1	INV	2
2	153329773	153418400	GreaterRhea	2	89031857	89084842	88628	52986	1	TRANS	2
2	153661549	154002519	GreaterRhea	2	88694404	88839790	340971	145387	-1	INV_TRANS	2
2	154053743	225079014	GreaterRhea	2	93769145	139291502	71025272	45522358	1	Normal	2
2	225090955	265958139	GreaterRhea	2	139277007	161734091	40867185	22457085	1	Normal	2
3	70774	802927	GreaterRhea	3	113041134	113314192	732154	273059	1	INV_TRANS	3
3	1284128	1442631	GreaterRhea	3	123858576	123933069	158504	74494	1	INV_TRANS	3
3	2084704	2789749	GreaterRhea	3	112679524	112999222	705046	319699	1	INV_TRANS	3
3	3010739	3607723	GreaterRhea	3	123559607	123806402	596985	246796	-1	TRANS	3
3	3699529	3784499	GreaterRhea	3	126718969	126790563	84971	71595	1	INV	3
3	3810781	4131221	GreaterRhea	3	113361394	113556016	320441	194623	-1	TRANS	3
3	4289583	7197871	GreaterRhea	3	124328651	126266120	2908289	1937470	1	INV	3
3	7739980	8036341	GreaterRhea	3	120754863	120931855	296362	176993	1	INV	3
3	8073309	12835047	GreaterRhea	3	114951631	118121412	4761739	3169782	-1	Normal	3
3	12991001	14670433	GreaterRhea	3	105612686	106721475	1679433	1108790	1	INV_TRANS	3
3	14861306	19201309	GreaterRhea	3	121031716	123546924	4340004	2515209	1	INV_TRANS	3
3	20115985	24362969	GreaterRhea	3	118151999	120641994	4246985	2489996	1	INV_TRANS	3
3	24381692	25460285	GreaterRhea	3	105138131	105533306	1078594	395176	1	INV_TRANS	3
3	25495744	26064873	GreaterRhea	3	112247571	112476270	569130	228700	-1	Normal	3
3	26140122	29720154	GreaterRhea	3	109122370	110856800	3580033	1734431	1	INV	3
3	29745598	29865034	GreaterRhea	3	110870044	110932065	119437	62022	-1	TRANS	3
3	29918873	32141940	GreaterRhea	3	110952658	112173264	2223068	1220607	1	INV_TRANS	3
3	32412276	32536106	GreaterRhea	3	107189752	107253351	123831	63600	1	INV	3
3	32662354	48722773	GreaterRhea	3	95065817	105125629	16060420	10059813	1	INV	3
3	48904112	51650877	GreaterRhea	3	113653145	114928152	2746766	1275008	-1	TRANS	3
3	51912634	54626678	GreaterRhea	3	107266797	108983455	2714045	1716659	-1	TRANS	3
3	54650553	74234904	GreaterRhea	3	82585664	95025846	19584352	12440183	-1	Normal	3
3	74369483	82199875	GreaterRhea	3	77283477	82566664	7830393	5283188	1	INV	3
3	82900391	88310901	GreaterRhea	3	73194381	76812083	5410511	3617703	-1	Normal	3
3	88472059	99341643	GreaterRhea	3	65910664	73109423	10869585	7198760	1	INV	3
3	99467199	146214926	GreaterRhea	3	35437832	65832324	46747728	30394493	-1	Normal	3
3	146503390	146590806	GreaterRhea	3	35181551	35250137	87417	68587	1	INV	3
3	147032555	179201360	GreaterRhea	3	14594641	34958525	32168806	20363885	-1	Normal	3
3	179285218	179397316	GreaterRhea	3	14452158	14525926	112099	73769	1	INV	3
3	179654959	180990495	GreaterRhea	3	13540850	14316612	1335537	775763	-1	Normal	3
3	180999238	181857434	GreaterRhea	3	12934452	13525804	858197	591353	1	INV	3
3	181884770	202439147	GreaterRhea	3	1065324	12924371	20554378	11859048	-1	Normal	3
3	202536328	204636733	GreaterRhea	3	349599	1042025	2100406	692427	1	INV	3
3	204872453	205158406	GreaterRhea	3	253408	332055	285954	78648	1	INV	3
3	205344610	205725956	GreaterRhea	3	53394	181573	381347	128180	-1	Normal	3
4	1726357	1973836	GreaterRhea	4	76890196	76982690	247480	92495	-1	TRANS	4
4	2395865	2567966	GreaterRhea	4	77495003	77588937	172102	93935	-1	TRANS	4
4	2619872	8922354	GreaterRhea	4	77618089	80642521	6302483	3024433	1	INV	4
4	8933851	9469100	GreaterRhea	4	76706464	76862233	535250	155770	-1	Normal	4
4	9766986	9899427	GreaterRhea	4	73227280	73307149	132442	79870	1	INV	4
4	10382127	13878177	GreaterRhea	4	71088625	73115130	3496051	2026506	-1	Normal	4
4	14117580	15528751	GreaterRhea	4	74993215	75825331	1411172	832117	-1	TRANS	4
4	16128395	16536073	GreaterRhea	4	73317490	73532748	407679	215259	1	INV_TRANS	4
4	16604844	17299224	GreaterRhea	4	76225381	76655587	694381	430207	-1	TRANS	4
4	17384617	17614293	GreaterRhea	4	75977833	76123018	229677	145186	1	INV_TRANS	4
4	17882699	19423490	GreaterRhea	4	73624242	74642151	1540792	1017910	1	INV_TRANS	4
4	19574298	140602348	GreaterRhea	4	30721	71066489	121028051	71035769	-1	Normal	4
5	56323363	61120161	GreaterRhea	4a	173571	1727481	4796799	1553911	-1	INV	4a
5	61230903	62076788	GreaterRhea	4a	1732730	2085353	845886	352624	1	Normal	4a
5	62863257	63691917	GreaterRhea	4a	11941054	12399034	828661	457981	1	TRANS	4a
5	63697901	64451914	GreaterRhea	4a	20795432	21018060	754014	222629	-1	INV_TRANS	4a
5	64615802	74108258	GreaterRhea	4a	12415612	17107980	9492457	4692369	-1	INV_TRANS	4a
5	74168144	79804879	GreaterRhea	4a	21022515	24148413	5636736	3125899	1	TRANS	4a
5	79950996	95570695	GreaterRhea	4a	2159296	11878266	15619700	9718971	1	Normal	4a
5	95643674	102860641	GreaterRhea	4a	17161161	20670205	7216968	3509045	1	Normal	4a
5	33325	28543604	GreaterRhea	9	14593199	29901537	28510280	15308339	1	Normal	9
5	28597313	49432039	GreaterRhea	9	2634247	14573692	20834727	11939446	-1	INV_TRANS	9
5	49504531	49765889	GreaterRhea	9	721304	843323	261359	122020	1	TRANS	9
5	49807596	50501200	GreaterRhea	9	910679	1110566	693605	199888	-1	INV_TRANS	9
5	50542197	52915766	GreaterRhea	9	1633287	2626063	2373570	992777	1	TRANS	9
5	52998221	54600843	GreaterRhea	9	40039	679923	1602623	639885	-1	INV_TRANS	9
5	54628796	56220069	GreaterRhea	9	1137135	1610137	1591274	473003	1	TRANS	9
6	636245	23401153	GreaterRhea	5	124444	11984674	22764909	11860231	1	INV_TRANS	5
6	23458899	42159380	GreaterRhea	5	11950513	23887121	18700482	11936609	1	INV_TRANS	5
6	42306052	60780744	GreaterRhea	5	58240218	69219669	18474693	10979452	-1	Normal	5
6	60856984	62013980	GreaterRhea	5	24791351	25384881	1156997	593531	-1	TRANS	5
6	62016324	72051722	GreaterRhea	5	52035232	58164778	10035399	6129547	1	INV	5
6	72097551	75814156	GreaterRhea	5	49823747	52030460	3716606	2206714	1	INV	5
6	75869231	111274455	GreaterRhea	5	28061421	49761972	35405225	21700552	-1	Normal	5
6	111438244	111628434	GreaterRhea	5	25453165	25566762	190191	113598	-1	TRANS	5
6	111824656	116279526	GreaterRhea	5	26623714	28046060	4454871	1422347	-1	Normal	5
6	116426446	116620390	GreaterRhea	5	26124500	26237594	193945	113095	-1	Normal	5
6	116826521	118977568	GreaterRhea	5	23943730	24655400	2151048	711671	1	INV	5
6	119385841	119929909	GreaterRhea	5	26360703	26498257	544069	137555	-1	TRANS	5
6	120416619	120994489	GreaterRhea	5	25741876	25920793	577871	178918	-1	TRANS	5
7	52128478	54268125	GreaterRhea	6	22547393	23618664	2139648	1071272	1	TRANS	6
7	54368738	56337532	GreaterRhea	6	21299934	22512524	1968795	1212591	1	TRANS	6
7	56399815	59442056	GreaterRhea	6	19604648	21248987	3042242	1644340	-1	INV_TRANS	6
7	59742024	60610249	GreaterRhea	6	39766584	40000269	868226	233686	1	TRANS	6
7	60756492	90257002	GreaterRhea	6	23677360	39670267	29500511	15992908	1	TRANS	6
7	90606959	95957430	GreaterRhea	6	16314482	19395087	5350472	3080606	-1	INV_TRANS	6
7	96059988	124947999	GreaterRhea	6	61084	16245028	28888012	16183945	1	Normal	6
7	147567	19746182	GreaterRhea	12	13375244	24585291	19598616	11210048	1	Normal	12
7	19778537	41347596	GreaterRhea	12	3888314	13329824	21569060	9441511	-1	INV_TRANS	12
7	41688828	44552286	GreaterRhea	12	2160270	3605198	2863459	1444929	1	TRANS	12
7	44631017	45952986	GreaterRhea	12	1092196	1687086	1321970	594891	-1	INV_TRANS	12
7	46474305	46658832	GreaterRhea	12	3663537	3768796	184528	105260	-1	INV_TRANS	12
7	46916796	47824869	GreaterRhea	12	1735670	2106313	908074	370644	1	TRANS	12
7	48584744	49099465	GreaterRhea	12	153040	273215	514722	120176	1	TRANS	12
7	50182126	51261325	GreaterRhea	12	569683	809189	1079200	239507	-1	INV_TRANS	12
7	51451569	51800907	GreaterRhea	12	438678	552683	349339	114006	1	TRANS	12
8	1220458	2025470	GreaterRhea	7	21233	343945	805013	322713	-1	INV	7
8	2116891	14616663	GreaterRhea	7	694392	6522656	12499773	5828265	1	Normal	7
8	14739718	17759067	GreaterRhea	7	6574816	8344425	3019350	1769610	-1	INV	7
8	17802486	45235408	GreaterRhea	7	8375986	24831973	27432923	16455988	1	Normal	7
8	45281801	74845321	GreaterRhea	7	25935130	43120579	29563521	17185450	-1	INV	7
8	75169605	75629102	GreaterRhea	7	25713317	25834195	459498	120879	1	TRANS	7
8	75732143	78168114	GreaterRhea	7	24842413	25707081	2435972	864669	-1	INV_TRANS	7
9	2946	24124133	GreaterRhea	8	22585098	35772561	24121188	13187464	1	TRANS	8
9	24253718	47151704	GreaterRhea	8	8759644	22515096	22897987	13755453	-1	INV	8
9	47628664	53817759	GreaterRhea	8	55560	3498520	6189096	3442961	1	TRANS	8
9	53872489	59343507	GreaterRhea	8	3532381	5996776	5471019	2464396	-1	INV_TRANS	8
9	59388261	66539790	GreaterRhea	8	6011581	8433328	7151530	2421748	1	TRANS	8
9	67264298	70655897	GreaterRhea	13	1094673	2203016	3391600	1108344	-1	INV	13
9	70733412	72492225	GreaterRhea	13	105571	1016489	1758814	910919	1	TRANS	13
9	72712724	85454894	GreaterRhea	13	2252513	9488055	12742171	7235543	1	Normal	13
9	85556172	88386840	GreaterRhea	13	13331699	15232414	2830669	1900716	-1	INV	13
9	88592741	100640456	GreaterRhea	13	15337479	21850276	12047716	6512798	-1	INV	13
9	100704315	106992877	GreaterRhea	13	9516006	13261591	6288563	3745586	1	TRANS	13
9	107004728	107469143	GreaterRhea	13	21912949	22114828	464416	201880	1	Normal	13
10	3272	38785906	GreaterRhea	10	2462812	24611077	38782635	22148266	-1	Normal	10
10	39010357	45605628	GreaterRhea	10	142153	2361326	6595272	2219174	1	INV	10
10	46331983	46487485	GreaterRhea	14	16027776	16086562	155503	58787	-1	TRANS	14
10	46569534	49688374	GreaterRhea	14	18104332	19558290	3118841	1453959	1	INV	14
10	49804799	54153140	GreaterRhea	14	16236049	17955338	4348342	1719290	1	INV	14
10	54257166	54536675	GreaterRhea	14	16121115	16231117	279510	110003	1	INV	14
10	54857170	85176412	GreaterRhea	14	18945	16014255	30319243	15995311	-1	Normal	14
11	10360	35476873	GreaterRhea	11	4678	20816772	35466514	20812095	1	Normal	11
11	35496607	35938857	GreaterRhea	11	22180554	22422387	442251	241834	1	TRANS	11
11	36215080	37387868	GreaterRhea	11	21647512	22110482	1172789	462971	-1	INV	11
11	37581147	38149415	GreaterRhea	11	22534113	22789312	568269	255200	-1	INV	11
11	38391152	39102631	GreaterRhea	11	23079309	23429773	711480	350465	1	Normal	11
11	39973738	40760952	GreaterRhea	11	21274688	21600678	787215	325991	1	TRANS	11
11	41485748	42143549	GreaterRhea	11	20962597	21162065	657802	199469	-1	INV_TRANS	11
12	225329	1651972	GreaterRhea	15	16514304	16878112	1426644	363809	1	INV	15
12	3407393	3698725	GreaterRhea	15	14944914	15053552	291333	108639	1	INV_TRANS	15
12	4472736	5838146	GreaterRhea	15	15207893	15976560	1365411	768668	-1	Normal	15
12	5974214	9003346	GreaterRhea	15	13031957	14744526	3029133	1712570	1	INV	15
12	9195567	33155046	GreaterRhea	15	11545	12974085	23959480	12962541	-1	Normal	15
13	71322	19756177	GreaterRhea	17	24211	10854175	19684856	10829965	1	Normal	17
13	20219664	20754268	GreaterRhea	17	12785151	13009367	534605	224217	-1	INV_TRANS	17
13	21190272	21557124	GreaterRhea	17	10894022	11008289	366853	114268	1	Normal	17
13	21585631	23148122	GreaterRhea	17	11440590	12080102	1562492	639513	-1	INV	17
13	23536906	24675891	GreaterRhea	17	12124190	12638518	1138986	514329	-1	INV	17
13	24891123	25918594	GreaterRhea	17	11029015	11360247	1027472	331233	1	TRANS	17
14	75670	18797899	GreaterRhea	18	4406052	13775811	18722230	9369760	-1	Normal	18
14	19363869	27053148	GreaterRhea	18	182408	4321280	7689280	4138873	1	INV	18
15	43096	11795755	GreaterRhea	19	6497153	12509254	11752660	6012102	1	Normal	19
15	11869829	12353464	GreaterRhea	19	12515724	12724579	483636	208856	-1	INV	19
15	12363578	12470816	GreaterRhea	19	12741440	12798234	107239	56795	1	Normal	19
15	12502719	13269691	GreaterRhea	19	6135789	6483219	766973	347431	-1	INV_TRANS	19
15	13284053	21371195	GreaterRhea	19	1195891	6068363	8087143	4872473	1	TRANS	19
15	22254662	22713217	GreaterRhea	19	294901	450107	458556	155207	-1	INV_TRANS	19
15	23151846	24824915	GreaterRhea	19	619272	1169645	1673070	550374	1	TRANS	19
15	24885025	25561217	GreaterRhea	19	36030	238438	676193	202409	1	TRANS	19
16	6501862	6700955	GreaterRhea	20	1475631	1546084	199094	70454	-1	INV_TRANS	20
16	6832650	7116496	GreaterRhea	20	1557195	1700037	283847	142843	1	TRANS	20
16	7504899	8897367	GreaterRhea	20	760759	1336905	1392469	576147	-1	INV	20
16	9034059	10852810	GreaterRhea	20	2604764	3400944	1818752	796181	-1	INV	20
16	11221295	11372316	GreaterRhea	20	2375914	2477699	151022	101786	1	TRANS	20
16	11557369	12582734	GreaterRhea	20	1766971	2280592	1025366	513622	-1	INV_TRANS	20
16	12865003	13993619	GreaterRhea	20	45152	657260	1128617	612109	-1	INV_TRANS	20
16	14034445	15793505	GreaterRhea	20	3438588	4471057	1759061	1032470	-1	INV	20
16	15836184	39057186	GreaterRhea	20	4497449	17676466	23221003	13179018	1	Normal	20
17	127255	14304213	GreaterRhea	21	2227142	8925727	14176959	6698586	-1	Normal	21
17	14455886	18284039	GreaterRhea	21	115308	1066919	3828154	951612	-1	Normal	21
17	18661037	20305503	GreaterRhea	21	1150582	1772018	1644467	621437	-1	TRANS	21
17	23315827	23661213	GreaterRhea	21	1860960	1959019	345387	98060	-1	TRANS	21
18	198339	2015672	GreaterRhea	22	4942765	5219404	1817334	276640	-1	Normal	22
18	2312374	3270969	GreaterRhea	22	5251241	5394045	958596	142805	1	INV_TRANS	22
18	3395428	3865193	GreaterRhea	22	4822164	4910600	469766	88437	1	INV	22
18	5348110	6237526	GreaterRhea	22	4347784	4813411	889417	465628	1	INV	22
18	6431430	16357620	GreaterRhea	22	94351	4212104	9926191	4117754	-1	Normal	22
19	145293	19917765	GreaterRhea	23	26719	8200519	19772473	8173801	-1	Normal	23
20	1307893	15523371	GreaterRhea	24	1623325	8096165	14215479	6472841	-1	Normal	24
20	15531440	18380162	GreaterRhea	24	387336	1604221	2848723	1216886	1	INV	24
20	18448673	18763319	GreaterRhea	24	253496	374521	314647	121026	-1	Normal	24
20	18797003	19096278	GreaterRhea	24	74286	251268	299276	176983	1	INV	24
21	5731888	8227483	GreaterRhea	25	2665126	3050697	2495596	385572	-1	Normal	25
21	8281429	9413556	GreaterRhea	25	2309678	2621066	1132128	311389	1	INV	25
21	9919396	17092967	GreaterRhea	25	11084	2271967	7173572	2260884	-1	Normal	25
22	100817	993114	GreaterRhea	26	6709999	6929097	892298	219099	1	INV	26
22	1387626	2224435	GreaterRhea	26	5665076	5786083	836810	121008	1	INV_TRANS	26
22	2666305	3625730	GreaterRhea	26	6216575	6657969	959426	441395	1	INV	26
22	3924665	4343919	GreaterRhea	26	6953776	7238558	419255	284783	-1	TRANS	26
22	4355373	4901116	GreaterRhea	26	5883417	6118793	545744	235377	1	INV	26
22	5085956	5239440	GreaterRhea	26	7312365	7395931	153485	83567	-1	TRANS	26
22	5417550	18553795	GreaterRhea	26	26585	5614444	13136246	5587860	-1	Normal	26
23	93661	3263716	GreaterRhea	27	4927913	5913348	3170056	985436	1	INV	27
23	4363454	16409265	GreaterRhea	27	19464	4681135	12045812	4661672	-1	Normal	27
24	45096	7037155	GreaterRhea	28	3384	2638555	6992060	2635172	-1	Normal	28
24	7041687	8723815	GreaterRhea	28	2642843	3260018	1682129	617176	1	INV_TRANS	28
24	9071524	13667532	GreaterRhea	28	4175326	5920653	4596009	1745328	-1	TRANS	28
24	13902407	15594497	GreaterRhea	28	3609372	4159624	1692091	550253	1	INV_TRANS	28
24	15675745	16612919	GreaterRhea	28	3288992	3490109	937175	201118	1	INV_TRANS	28
25	86159	2647241	GreaterRhea	Z	10912073	11867562	2561083	955490	-1	INV_TRANS	Z
25	3364944	4245222	GreaterRhea	Z	10359466	10787383	880279	427918	1	TRANS	Z
25	4358858	21994526	GreaterRhea	Z	1808	10295025	17635669	10293218	-1	INV	Z
25	22008698	98501631	GreaterRhea	Z	11886404	58997175	76492934	47110772	1	Normal	Z
25	98614682	101035493	GreaterRhea	Z	73624750	75116412	2420812	1491663	1	TRANS	Z
25	101240222	111193374	GreaterRhea	Z	59418636	66120510	9953153	6701875	-1	INV	Z
25	111381116	111515621	GreaterRhea	Z	59105484	59199561	134506	94078	1	TRANS	Z
25	111975453	113373953	GreaterRhea	Z	77430235	78235502	1398501	805268	-1	INV_TRANS	Z
25	113413337	113557721	GreaterRhea	Z	77303135	77401164	144385	98030	1	TRANS	Z
25	113664275	114150299	GreaterRhea	Z	76995717	77265815	486025	270099	-1	INV_TRANS	Z
25	114404041	117009962	GreaterRhea	Z	78521099	79914597	2605922	1393499	-1	INV_TRANS	Z
25	117487253	120906519	GreaterRhea	Z	66281280	68484427	3419267	2203148	1	Normal	Z
25	122954900	124040951	GreaterRhea	Z	76185120	76794694	1086052	609575	-1	INV_TRANS	Z
25	124616310	126221392	GreaterRhea	Z	75307669	76156400	1605083	848732	1	TRANS	Z
25	126540612	127967452	GreaterRhea	Z	72100622	72887173	1426841	786552	1	TRANS	Z
25	128079035	132022240	GreaterRhea	Z	69560931	72037533	3943206	2476603	-1	INV	Z
25	132351514	133233871	GreaterRhea	Z	72917047	73316889	882358	399843	1	Normal	Z
1	118186	17750494	Cassowary	1	59183	6530311	17632309	6471129	1	Normal	1
1	17767540	20182775	Cassowary	1	15624053	17224992	2415236	1600940	1	TRANS	1
1	20270564	34120225	Cassowary	1	6600839	15602605	13849662	9001767	-1	INV	1
1	34171708	206409560	Cassowary	1	17263021	129981505	172237853	112718485	1	Normal	1
1	206681533	207104603	Cassowary	1	130146159	130366411	423071	220253	-1	INV	1
1	207495357	326083527	Cassowary	1	130470350	205385475	118588171	74915126	1	Normal	1
1	326095075	326831056	Cassowary	1	205388849	205941004	735982	552156	-1	INV	1
1	326992200	339982481	Cassowary	1	205920275	213809101	12990282	7888827	1	Normal	1
1	340505026	340854363	Cassowary	1	213898362	214023110	349338	124749	-1	INV	1
1	341159276	342108784	Cassowary	1	214196644	214584686	949509	388043	-1	INV	1
1	343091864	344507459	Cassowary	1	214618352	215188171	1415596	569820	1	Normal	1
2	153102	32636015	Cassowary	2	145730059	164847401	32482914	19117343	-1	Normal	2
2	32710147	48442072	Cassowary	2	136031617	145672026	15731926	9640410	1	INV	2
2	48523104	75137422	Cassowary	2	118384940	135932491	26614319	17547552	1	INV	2
2	75470294	100291187	Cassowary	2	101676365	118243195	24820894	16566831	-1	Normal	2
2	100842807	119557763	Cassowary	2	88370231	101220732	18714957	12850502	1	INV	2
2	119775229	125352849	Cassowary	2	84535080	88349532	5577621	3814453	-1	Normal	2
2	125420908	125500646	Cassowary	2	84475301	84527356	79739	52056	1	INV	2
2	125524976	142883444	Cassowary	2	74861474	84412036	17358469	9550563	-1	Normal	2
2	142949870	143120735	Cassowary	2	74672620	74725907	170866	53288	1	INV	2
2	143790987	154002519	Cassowary	2	69451815	74658627	10211533	5206813	1	INV	2
2	154053725	187456094	Cassowary	2	47696558	69421734	33402370	21725177	-1	Normal	2
2	187701958	216873613	Cassowary	2	27986651	47660747	29171656	19674097	1	INV	2
2	216878711	265700886	Cassowary	2	113368	27935956	48822176	27822589	-1	Normal	2
3	1030522	1165204	Cassowary	3	2911808	2993972	134683	82165	-1	INV	3
3	1284128	1595594	Cassowary	3	17190140	17578302	311467	388163	1	TRANS	3
3	2084704	2774774	Cassowary	3	3590945	3886511	690071	295567	-1	INV	3
3	2983994	3610158	Cassowary	3	16866100	17153718	626165	287619	-1	INV_TRANS	3
3	3810782	4163555	Cassowary	3	3054250	3262416	352774	208167	1	TRANS	3
3	4289583	6582528	Cassowary	3	15160066	16742255	2292946	1582190	1	TRANS	3
3	6769895	6850746	Cassowary	3	18172736	18231571	80852	58836	-1	INV_TRANS	3
3	7355646	7649107	Cassowary	3	14916166	15131028	293462	214863	-1	INV_TRANS	3
3	8041669	12841729	Cassowary	3	8155841	11376527	4800061	3220687	1	Normal	3
3	13131129	14682047	Cassowary	3	4384797	5384677	1550919	999881	-1	INV_TRANS	3
3	14710890	16513627	Cassowary	3	1674677	2691242	1802738	1016566	-1	INV_TRANS	3
3	16731259	18992388	Cassowary	3	79533	1587073	2261130	1507541	1	TRANS	3
3	19510743	20101708	Cassowary	3	4105231	4381723	590966	276493	1	TRANS	3
3	20115985	24171953	Cassowary	3	5684094	8140538	4055969	2456445	-1	INV_TRANS	3
3	24379107	26064873	Cassowary	3	21329113	21985722	1685767	656610	-1	INV_TRANS	3
3	26534796	32141940	Cassowary	3	18299837	21250012	5607145	2950176	1	Normal	3
3	32408938	32536101	Cassowary	3	14551602	14619245	127164	67644	-1	INV_TRANS	3
3	32755882	48683920	Cassowary	3	22024005	32194743	15928039	10170739	-1	INV	3
3	48904112	54626677	Cassowary	3	11388112	14537166	5722566	3149055	1	TRANS	3
3	54650553	74238780	Cassowary	3	32286026	45059248	19588228	12773223	1	Normal	3
3	74384380	82154914	Cassowary	3	45110828	50419616	7770535	5308789	-1	INV	3
3	82322808	88069223	Cassowary	3	50556841	54408228	5746416	3851388	1	Normal	3
3	88623426	99312059	Cassowary	3	54703103	61863512	10688634	7160410	-1	INV	3
3	99446144	190744847	Cassowary	3	62063494	121665728	91298704	59602235	1	Normal	3
3	191314194	192943287	Cassowary	3	121909740	122963786	1629094	1054047	-1	INV	3
3	192997877	195349874	Cassowary	3	123064860	124633766	2351998	1568907	1	Normal	3
3	196346556	197457479	Cassowary	3	124753170	125366158	1110924	612989	-1	INV	3
3	197555081	204617050	Cassowary	3	125445671	128174287	7061970	2728617	1	Normal	3
3	204877976	205162658	Cassowary	3	128191736	128263878	284683	72143	-1	INV	3
3	205245419	205900193	Cassowary	3	128283145	128490999	654775	207855	1	Normal	3
4	1726357	2022600	Cassowary	4	83740802	83855849	296244	115048	1	INV	4
4	2693133	8922357	Cassowary	4	79742207	82992483	6229225	3250277	-1	Normal	4
4	8933851	9492968	Cassowary	4	79441459	79632742	559118	191284	1	INV	4
4	9767525	9886259	Cassowary	4	75771243	75834578	118735	63336	1	INV	4
4	10382236	13898597	Cassowary	4	73514097	75653343	3516362	2139247	-1	Normal	4
4	14093649	15528751	Cassowary	4	75848982	76718897	1435103	869916	-1	TRANS	4
4	16128411	16486823	Cassowary	4	78376733	78561545	358413	184813	-1	TRANS	4
4	16604844	17376991	Cassowary	4	78609887	79164796	772148	554910	1	INV_TRANS	4
4	17411242	17573872	Cassowary	4	79268527	79361023	162631	92497	-1	TRANS	4
4	18235243	18483619	Cassowary	4	77751683	77946465	248377	194783	1	INV_TRANS	4
4	18618687	19413395	Cassowary	4	77185728	77692612	794709	506885	-1	TRANS	4
4	19575961	101713947	Cassowary	4	22105148	73497245	82137987	51392098	-1	Normal	4
4	101941008	102023995	Cassowary	4	21907957	21961273	82988	53317	1	INV	4
4	102148032	140602411	Cassowary	4	33767	21844243	38454380	21810477	-1	Normal	4
5	56323363	57290267	Cassowary	4a	1416368	1763789	966905	347422	-1	INV_TRANS	4a
5	57530803	57739861	Cassowary	4a	21710922	21783862	209059	72941	-1	INV_TRANS	4a
5	57821623	60904912	Cassowary	4a	227977	1196307	3083290	968331	-1	INV	4a
5	61230903	62082422	Cassowary	4a	1768963	2150765	851520	381803	1	Normal	4a
5	62773004	63656257	Cassowary	4a	12487677	12985122	883254	497446	1	TRANS	4a
5	63887725	64451914	Cassowary	4a	21817058	22002339	564190	185282	-1	INV_TRANS	4a
5	64615808	74108587	Cassowary	4a	12997748	18009857	9492780	5012110	-1	INV_TRANS	4a
5	74168144	79804879	Cassowary	4a	22039486	25167525	5636736	3128040	1	TRANS	4a
5	79869482	95570767	Cassowary	4a	2169779	12468471	15701286	10298693	1	Normal	4a
5	95643674	102860652	Cassowary	4a	18068243	21689509	7216979	3621267	1	Normal	4a
5	1899	28543604	Cassowary	9	15273110	31291539	28541706	16018430	1	Normal	9
5	28873787	49432121	Cassowary	9	2638908	15083142	20558335	12444235	-1	INV_TRANS	9
5	49504531	49765832	Cassowary	9	689386	804692	261302	115307	1	TRANS	9
5	49841856	50510465	Cassowary	9	847365	1040578	668610	193214	-1	INV_TRANS	9
5	50542197	52915756	Cassowary	9	1583352	2630768	2373560	1047417	1	TRANS	9
5	52998221	54600844	Cassowary	9	17125	647846	1602624	630722	-1	INV_TRANS	9
5	54628796	56220068	Cassowary	9	1080816	1568479	1591273	487664	1	TRANS	9
6	636244	60820591	Cassowary	5	34982474	71246160	60184348	36263687	-1	Normal	5
6	60856984	62013982	Cassowary	5	1654661	2246058	1156999	591398	1	INV_TRANS	5
6	62016325	72051720	Cassowary	5	28594131	34935250	10035396	6341120	1	INV	5
6	72090447	75728242	Cassowary	5	26328302	28546917	3637796	2218616	1	INV	5
6	75869232	111274455	Cassowary	5	4147594	26261341	35405224	22113748	-1	Normal	5
6	111311841	111733011	Cassowary	5	1393293	1631753	421171	238461	1	INV_TRANS	5
6	111824703	116371567	Cassowary	5	2719499	4132790	4546865	1413292	-1	Normal	5
6	116425042	116565594	Cassowary	5	2361790	2441091	140553	79302	-1	Normal	5
6	116826521	118928983	Cassowary	5	87923	726847	2102463	638925	1	INV	5
6	119385841	119841569	Cassowary	5	2596316	2670589	455729	74274	-1	TRANS	5
6	120415258	121004281	Cassowary	5	904697	1078258	589024	173562	-1	TRANS	5
7	52128478	54190835	Cassowary	6	17770522	18820304	2062358	1049783	-1	TRANS	6
7	54368738	56319309	Cassowary	6	18867014	20083625	1950572	1216612	-1	TRANS	6
7	56399805	59446420	Cassowary	6	20121378	21834051	3046616	1712674	1	INV	6
7	60232776	60610252	Cassowary	6	47398	172459	377477	125062	-1	TRANS	6
7	60959064	90146033	Cassowary	6	480170	17542847	29186970	17062678	-1	Normal	6
7	90580180	95975149	Cassowary	6	22044851	25234861	5394970	3190011	1	INV_TRANS	6
7	96085019	124796887	Cassowary	6	25357702	41954706	28711869	16597005	-1	TRANS	6
7	185274	19752703	Cassowary	12	4144	11520158	19567430	11516015	-1	Normal	12
7	19778607	41511959	Cassowary	12	11589308	21675106	21733353	10085799	1	INV_TRANS	12
7	41727672	43074647	Cassowary	12	22788983	23430475	1346976	641493	-1	TRANS	12
7	43141202	44552286	Cassowary	12	21709162	22560055	1411085	850894	1	INV_TRANS	12
7	44583982	45965964	Cassowary	12	23966222	24627009	1381983	660788	1	INV_TRANS	12
7	46005093	46213084	Cassowary	12	25359145	25434669	207992	75525	1	INV_TRANS	12
7	46229118	46713613	Cassowary	12	22600774	22769599	484496	168826	-1	TRANS	12
7	46916750	47807097	Cassowary	12	23534342	23941902	890348	407561	-1	TRANS	12
7	48692233	49099465	Cassowary	12	25467709	25565398	407233	97690	-1	TRANS	12
7	49111264	51263080	Cassowary	12	24646877	25154738	2151817	507862	1	INV_TRANS	12
7	51514283	51800907	Cassowary	12	25167730	25249558	286625	81829	-1	TRANS	12
8	482449	1868534	Cassowary	7	1880586	2472267	1386086	591682	1	TRANS	7
8	3697805	5602234	Cassowary	7	54115	1049330	1904430	995216	-1	INV	7
8	6568415	6665749	Cassowary	7	1392095	1454997	97335	62903	1	Normal	7
8	6795965	14616678	Cassowary	7	2539072	6782640	7820714	4243569	1	Normal	7
8	14739718	17771678	Cassowary	7	6832743	8712322	3031961	1879580	-1	INV	7
8	17802486	45235408	Cassowary	7	8744987	26148975	27432923	17403989	1	Normal	7
8	45281801	50091244	Cassowary	7	42834075	45007795	4809444	2173721	-1	INV_TRANS	7
8	50120645	50208069	Cassowary	7	42763528	42820493	87425	56966	1	TRANS	7
8	50282497	74900220	Cassowary	7	27279319	42743105	24617724	15463787	-1	INV	7
8	75169605	75629108	Cassowary	7	27076105	27202110	459504	126006	1	TRANS	7
8	75732143	78168114	Cassowary	7	26159335	27069850	2435972	910516	-1	INV_TRANS	7
9	2946	24123344	Cassowary	8	23614906	37037128	24120399	13422223	1	TRANS	8
9	24217772	47426320	Cassowary	8	9074018	23558285	23208549	14484268	-1	INV	8
9	47639276	47757330	Cassowary	8	111094	203052	118055	91959	-1	INV_TRANS	8
9	48157851	53822348	Cassowary	8	366320	3641930	5664498	3275611	1	TRANS	8
9	53872489	59319266	Cassowary	8	3690153	6282059	5446778	2591907	-1	INV_TRANS	8
9	59388274	66544328	Cassowary	8	6296833	8871675	7156055	2574843	1	TRANS	8
9	67264447	70716623	Cassowary	13	20630948	21808989	3452177	1178042	1	INV	13
9	70733412	72316469	Cassowary	13	21958707	22774050	1583058	815344	-1	TRANS	13
9	72687035	85397238	Cassowary	13	12951135	20586115	12710204	7634981	-1	Normal	13
9	85523437	88486252	Cassowary	13	7012047	9063576	2962816	2051530	1	INV	13
9	88569221	100691785	Cassowary	13	285681	6959810	12122565	6674130	1	INV	13
9	100759711	105814037	Cassowary	13	9554962	12904362	5054327	3349401	-1	TRANS	13
9	105890183	106007437	Cassowary	13	9441925	9513128	117255	71204	1	INV_TRANS	13
9	106288005	106992877	Cassowary	13	9063994	9360786	704873	296793	-1	TRANS	13
9	107004743	107469143	Cassowary	13	36294	241982	464401	205689	-1	Normal	13
10	3272	38786156	Cassowary	10	2531632	25623015	38782885	23091384	-1	Normal	10
10	39010357	45605656	Cassowary	10	94148	2417723	6595300	2323576	1	INV	10
10	46331954	46487485	Cassowary	14	4045623	4105163	155532	59541	1	TRANS	14
10	46569534	49688393	Cassowary	14	373322	1855160	3118860	1481839	-1	INV	14
10	49804799	54133229	Cassowary	14	2064195	3876118	4328431	1811924	-1	INV	14
10	54257166	54536678	Cassowary	14	3896211	4006479	279513	110269	-1	INV	14
10	54855361	85184066	Cassowary	14	4121046	20916411	30328706	16795366	1	Normal	14
11	10338	2939460	Cassowary	11	14816	1438941	2929123	1424126	1	Normal	11
11	2997076	35476873	Cassowary	11	1438515	21828274	32479798	20389760	1	Normal	11
11	35493499	35966300	Cassowary	11	23322442	23584271	472802	261830	1	TRANS	11
11	36215080	37387868	Cassowary	11	22722064	23235912	1172789	513849	-1	INV	11
11	37504677	38149415	Cassowary	11	23686218	23968340	644739	282123	-1	INV	11
11	38391137	39102631	Cassowary	11	24336728	24690177	711495	353450	1	Normal	11
11	39973782	40760952	Cassowary	11	22330884	22669797	787171	338914	1	TRANS	11
11	41099110	41205766	Cassowary	11	24140554	24202869	106657	62316	-1	INV_TRANS	11
11	41566530	42609598	Cassowary	11	21860126	22179800	1043069	319675	-1	INV_TRANS	11
12	195683	1657484	Cassowary	15	17109711	17488961	1461802	379251	1	INV	15
12	1753232	2159192	Cassowary	15	15384824	15471145	405961	86322	-1	TRANS	15
12	3407393	3841484	Cassowary	15	15527196	15702778	434092	175583	1	INV_TRANS	15
12	4143986	5883498	Cassowary	15	15758820	16757714	1739513	998895	-1	Normal	15
12	5974214	9003346	Cassowary	15	13544499	15321987	3029133	1777489	1	INV	15
12	9174743	33156766	Cassowary	15	12947	13493767	23982024	13480821	-1	Normal	15
13	71268	19756177	Cassowary	17	36477	11091863	19684910	11055387	1	Normal	17
13	20334099	20754268	Cassowary	17	13045007	13198352	420170	153346	-1	INV_TRANS	17
13	21177750	21557135	Cassowary	17	11125266	11246563	379386	121298	1	Normal	17
13	21585631	23350561	Cassowary	17	11615831	12328527	1764931	712697	-1	INV	17
13	23536906	24683576	Cassowary	17	12360901	12893188	1146671	532288	-1	INV	17
13	24891120	25918580	Cassowary	17	11268119	11601107	1027461	332989	1	TRANS	17
14	75665	18777114	Cassowary	18	4645704	14382091	18701450	9736388	-1	Normal	18
14	19363869	24193128	Cassowary	18	193468	2799523	4829260	2606056	1	INV	18
14	24300834	24488431	Cassowary	18	2812482	2917241	187598	104760	-1	TRANS	18
14	24611198	27053111	Cassowary	18	3052962	4541362	2441914	1488401	1	INV_TRANS	18
15	43096	11814888	Cassowary	19	6727375	12969619	11771793	6242245	1	Normal	19
15	11855354	12327988	Cassowary	19	12996523	13228340	472635	231818	-1	INV	19
15	12363590	12472094	Cassowary	19	13233484	13299901	108505	66418	1	Normal	19
15	12825553	13279330	Cassowary	19	6324431	6606363	453778	281933	-1	INV_TRANS	19
15	13284053	21371195	Cassowary	19	1228318	6248123	8087143	5019806	1	TRANS	19
15	22130712	22713217	Cassowary	19	327727	543563	582506	215837	-1	INV_TRANS	19
15	23151846	24824916	Cassowary	19	652303	1200405	1673071	548103	1	TRANS	19
15	24885025	25561217	Cassowary	19	60326	262500	676193	202175	1	TRANS	19
16	6500532	6794445	Cassowary	20	16663769	16771567	293914	107799	1	INV_TRANS	20
16	6832637	7082728	Cassowary	20	16517052	16654141	250092	137090	-1	TRANS	20
16	7263950	8917888	Cassowary	20	16778612	17487014	1653939	708403	1	INV_TRANS	20
16	9025629	10296294	Cassowary	20	14700403	15307959	1270666	607557	1	INV_TRANS	20
16	10536352	11054033	Cassowary	20	16176372	16361787	517682	185416	-1	TRANS	20
16	11221287	11372339	Cassowary	20	15995262	16100122	151053	104861	1	INV_TRANS	20
16	11477391	12600497	Cassowary	20	15356916	15932520	1123107	575605	-1	TRANS	20
16	12614535	13997523	Cassowary	20	17499888	18237437	1382989	737550	1	INV	20
16	14018519	15795593	Cassowary	20	13566916	14663059	1777075	1096144	1	INV	20
16	15864505	39050650	Cassowary	20	28637	13529377	23186146	13500741	-1	Normal	20
17	17769	13788626	Cassowary	21	2373355	9713828	13770858	7340474	-1	Normal	21
17	14423640	18284039	Cassowary	21	62185	1103773	3860400	1041589	-1	Normal	21
17	18764227	20305503	Cassowary	21	1178279	1696370	1541277	518092	-1	TRANS	21
17	20657668	23661213	Cassowary	21	1873566	2243694	3003546	370129	-1	TRANS	21
18	1568859	2015667	Cassowary	22	456434	559997	446809	103564	1	TRANS	22
18	2312367	3270970	Cassowary	22	110201	289517	958604	179317	1	Normal	22
18	3395451	3835372	Cassowary	22	624536	730214	439922	105679	-1	INV	22
18	4430294	4986835	Cassowary	22	1273443	1375742	556542	102300	1	TRANS	22
18	5348018	6237526	Cassowary	22	772795	1272972	889509	500178	-1	INV	22
18	6402111	16498444	Cassowary	22	1406464	5944080	10096334	4537617	1	Normal	22
19	145293	19917765	Cassowary	23	27620	8388571	19772473	8360952	-1	Normal	23
20	1307893	15523371	Cassowary	24	1648683	8253365	14215479	6604683	-1	Normal	24
20	15531356	18385133	Cassowary	24	370393	1632142	2853778	1261750	1	INV	24
20	18431272	18763319	Cassowary	24	242090	369227	332048	127138	-1	Normal	24
20	18797000	19096281	Cassowary	24	64878	239584	299282	174707	1	INV	24
20	19105487	19209186	Cassowary	24	5744	61076	103700	55333	-1	Normal	24
21	5731937	8240483	Cassowary	25	2444329	2904878	2508547	460550	1	INV	25
21	8643971	9413569	Cassowary	25	2949391	3277473	769599	328083	-1	TRANS	25
21	9919407	17092967	Cassowary	25	20786	2315480	7173561	2294695	-1	Normal	25
22	100817	958264	Cassowary	26	510072	719956	857448	209885	-1	INV	26
22	1387626	1640416	Cassowary	26	1726437	1789017	252791	62581	-1	INV_TRANS	26
22	2786346	3802694	Cassowary	26	726397	1146335	1016349	419939	-1	INV	26
22	3924665	4344185	Cassowary	26	190654	473706	419521	283053	1	TRANS	26
22	4355098	5003951	Cassowary	26	1257155	1539138	648854	281984	-1	INV	26
22	5062730	5249170	Cassowary	26	20485	122845	186441	102361	1	TRANS	26
22	5411118	18553843	Cassowary	26	1819661	7403450	13142726	5583790	1	Normal	26
23	191534	3041782	Cassowary	27	102629	1029890	2850249	927262	-1	INV	27
23	3707208	16446595	Cassowary	27	1133829	6211285	12739388	5077457	1	Normal	27
24	109288	7037155	Cassowary	28	1272	2680353	6927868	2679082	-1	Normal	28
24	7041687	8723815	Cassowary	28	2706467	3388082	1682129	681616	1	INV_TRANS	28
24	8827395	13667532	Cassowary	28	4381627	6254665	4840138	1873039	-1	TRANS	28
24	13770844	15594497	Cassowary	28	3727539	4365834	1823654	638296	1	INV_TRANS	28
24	15675745	16612918	Cassowary	28	3424822	3655778	937174	230957	1	INV_TRANS	28
25	86154	2647241	Cassowary	Z	11073531	12037180	2561088	963650	-1	INV_TRANS	Z
25	3360887	4245272	Cassowary	Z	10487461	10940312	884386	452852	1	TRANS	Z
25	4489616	21994526	Cassowary	Z	3603	10381479	17504911	10377877	-1	INV	Z
25	22008699	98503756	Cassowary	Z	12056707	60900009	76495058	48843303	1	Normal	Z
25	98614679	101035493	Cassowary	Z	76052996	77607394	2420815	1554399	1	TRANS	Z
25	101118950	101202945	Cassowary	Z	68224741	68286261	83996	61521	1	TRANS	Z
25	101240222	111181533	Cassowary	Z	61358270	68190341	9941312	6832072	-1	INV	Z
25	111381155	111528836	Cassowary	Z	61023941	61133766	147682	109826	1	TRANS	Z
25	111875215	114178996	Cassowary	Z	77645679	79069154	2303782	1423476	1	TRANS	Z
25	114390986	116208959	Cassowary	Z	79642422	80748323	1817974	1105902	-1	INV_TRANS	Z
25	117450651	121895765	Cassowary	Z	68337530	71353620	4445115	3016091	1	Normal	Z
25	122800596	124055892	Cassowary	Z	81096819	81880628	1255297	783810	1	TRANS	Z
25	124263781	126221392	Cassowary	Z	81893457	82982114	1957612	1088658	-1	INV_TRANS	Z
25	126245898	126325537	Cassowary	Z	75850379	75912021	79640	61643	1	TRANS	Z
25	126495408	127967455	Cassowary	Z	74470457	75315692	1472048	845236	1	TRANS	Z
25	128079030	132260548	Cassowary	Z	71618175	74439946	4181519	2821772	-1	INV	Z
25	132351476	133233871	Cassowary	Z	75345375	75757194	882396	411820	1	Normal	Z
1	119588	332895	Emu	1	91093	163977	213308	72885	-1	INV	1
1	1594638	17750494	Emu	1	375584	6673015	16155857	6297432	1	Normal	1
1	17805348	20182775	Emu	1	6720104	8295996	2377428	1575893	-1	INV	1
1	20270661	206409560	Emu	1	8341519	130329151	186138900	121987633	1	Normal	1
1	206681533	207132097	Emu	1	130489680	130728926	450565	239247	-1	INV	1
1	207483605	326083526	Emu	1	130819916	206233873	118599922	75413958	1	Normal	1
1	326095075	326797232	Emu	1	206264168	206786059	702158	521892	-1	INV	1
1	326992200	340157363	Emu	1	206765436	214739540	13165164	7974105	1	Normal	1
1	340527686	340854363	Emu	1	214776361	214877760	326678	101400	-1	INV	1
1	341159398	342108784	Emu	1	215077540	215465158	949387	387619	-1	INV	1
1	343090407	344508020	Emu	1	215497144	216060200	1417614	563057	1	Normal	1
2	153097	2526855	Emu	2	22125	821503	2373759	799379	-1	INV	2
2	3352262	32681175	Emu	2	850624	19212744	29328914	18362121	1	Normal	2
2	32710102	48422739	Emu	2	19257798	28950156	15712638	9692359	-1	INV	2
2	48586369	75086130	Emu	2	29078455	46537218	26499762	17458764	-1	INV	2
2	75396100	100541986	Emu	2	46659011	63496552	25145887	16837542	1	Normal	2
2	100860815	119557715	Emu	2	63792051	76641298	18696901	12849248	-1	INV	2
2	119775229	142883444	Emu	2	76670175	90096948	23108216	13426774	1	Normal	2
2	143790987	153127039	Emu	2	90720518	95681049	9336053	4960532	-1	INV	2
2	153329779	153418516	Emu	2	90647084	90702671	88738	55588	1	TRANS	2
2	154053725	187456094	Emu	2	95710806	117513098	33402370	21802293	1	Normal	2
2	187762111	216844634	Emu	2	117565992	137148464	29082524	19582473	-1	INV	2
2	216888759	262137638	Emu	2	137234542	164235451	45248880	27000910	1	Normal	2
2	264971428	265700886	Emu	2	164701953	164995243	729459	293291	-1	INV	2
3	70786	802927	Emu	3	125842432	126098095	732142	255664	1	INV	3
3	1030522	1165204	Emu	3	126398059	126480790	134683	82732	1	INV_TRANS	3
3	1296969	1438433	Emu	3	112021339	112087296	141465	65958	-1	TRANS	3
3	2084704	2789749	Emu	3	125496956	125805751	705046	308796	1	INV	3
3	2821830	2970753	Emu	3	111950914	112011393	148924	60480	1	INV_TRANS	3
3	2983994	3610158	Emu	3	112139305	112443843	626165	304539	1	INV_TRANS	3
3	3699531	3784499	Emu	3	111831125	111905260	84969	74136	1	INV_TRANS	3
3	3810782	4163555	Emu	3	126127665	126337772	352774	210108	-1	TRANS	3
3	4397833	6434367	Emu	3	112724327	114093442	2036535	1369116	-1	TRANS	3
3	6745644	7197871	Emu	3	111050049	111310346	452228	260298	1	INV_TRANS	3
3	7355646	7659084	Emu	3	114193128	114412248	303439	219121	1	INV_TRANS	3
3	7739980	8036356	Emu	3	126507364	126682182	296377	174819	1	INV_TRANS	3
3	8073309	12841729	Emu	3	117974955	121164465	4768421	3189511	-1	Normal	3
3	12883774	14682017	Emu	3	123843866	124995076	1798244	1151211	1	INV_TRANS	3
3	14715625	16513627	Emu	3	126696712	127705475	1798003	1008764	1	INV_TRANS	3
3	16731259	18992388	Emu	3	127788166	129290209	2261130	1502044	-1	TRANS	3
3	19559451	20101724	Emu	3	124998155	125251064	542274	252910	-1	TRANS	3
3	20115985	24358720	Emu	3	121196036	123767254	4242736	2571219	1	INV_TRANS	3
3	24383687	26082478	Emu	3	107295455	107948892	1698792	653438	1	INV_TRANS	3
3	26671555	29696011	Emu	3	109376537	110928135	3024457	1551599	-1	Normal	3
3	29745596	29865033	Emu	3	109280762	109346372	119438	65611	1	INV	3
3	29968648	32141940	Emu	3	108022132	109237785	2173293	1215654	-1	Normal	3
3	32408929	32536098	Emu	3	114727580	114796205	127170	68626	1	INV_TRANS	3
3	32652231	48722773	Emu	3	97054945	107279872	16070543	10224928	1	INV	3
3	48904112	54493057	Emu	3	114893159	117959725	5588946	3066567	-1	TRANS	3
3	54650553	74234901	Emu	3	84278727	97019646	19584349	12740920	-1	Normal	3
3	74369483	82180794	Emu	3	78829698	84151041	7811312	5321344	1	INV	3
3	82779196	87740935	Emu	3	75093554	78452640	4961740	3359087	-1	Normal	3
3	88218879	88310901	Emu	3	74748655	74805404	92023	56750	1	INV	3
3	88602119	99403445	Emu	3	67439834	74633007	10801327	7193174	1	INV	3
3	99467190	195305997	Emu	3	4735404	67248651	95838808	62513248	-1	Normal	3
3	196345320	197475719	Emu	3	3251470	3878583	1130400	627114	1	INV	3
3	197548254	204289099	Emu	3	305362	3031081	6740846	2725720	-1	Normal	3
3	205245419	205900193	Emu	3	74411	275231	654775	200821	1	INV	3
4	1681954	2022600	Emu	4	84311267	84432783	340647	121517	1	INV	4
4	2693133	8922357	Emu	4	80220487	83489557	6229225	3269071	-1	Normal	4
4	8933851	9492968	Emu	4	79865340	80056432	559118	191093	1	INV	4
4	9767525	9899427	Emu	4	75632714	75707605	131903	74892	1	INV	4
4	10382236	13893545	Emu	4	73366721	75516349	3511310	2149629	-1	Normal	4
4	14117580	15528751	Emu	4	76040481	76888885	1411172	848405	-1	TRANS	4
4	15635802	15878997	Emu	4	77108084	77287516	243196	179433	1	INV_TRANS	4
4	16128411	16486823	Emu	4	78562746	78744930	358413	182185	-1	TRANS	4
4	16604844	17376987	Emu	4	78805948	79350822	772144	544875	1	INV_TRANS	4
4	17474197	17573872	Emu	4	79453912	79513096	99676	59185	-1	TRANS	4
4	18235243	18483620	Emu	4	77933954	78129972	248378	196019	1	INV_TRANS	4
4	18571874	19401740	Emu	4	77380743	77908556	829867	527814	-1	TRANS	4
4	19575961	139579943	Emu	4	75097	73304080	120003983	73228984	-1	Normal	4
5	56323363	57290266	Emu	4a	584528	932196	966904	347669	-1	INV	4a
5	60557494	61120161	Emu	4a	27625	233391	562668	205767	1	TRANS	4a
5	61230903	62082422	Emu	4a	937512	1318693	851520	381182	1	Normal	4a
5	62863257	63659468	Emu	4a	11781366	12246038	796212	464673	1	TRANS	4a
5	63887725	64449743	Emu	4a	21137164	21321598	562019	184435	-1	INV_TRANS	4a
5	64615808	74108258	Emu	4a	12306768	17321033	9492451	5014266	-1	INV_TRANS	4a
5	74168144	79804879	Emu	4a	21359818	24489630	5636736	3129813	1	TRANS	4a
5	79869482	95570767	Emu	4a	1337652	11718801	15701286	10381150	1	Normal	4a
5	95643674	102860652	Emu	4a	17379428	21007839	7216979	3628412	1	Normal	4a
5	33314	28529194	Emu	9	15505988	31462891	28495881	15956904	1	Normal	9
5	28873787	49430351	Emu	9	2841426	15310833	20556565	12469408	-1	INV_TRANS	9
5	49504531	49765832	Emu	9	816094	930986	261302	114893	1	TRANS	9
5	49841856	50510465	Emu	9	981860	1174684	668610	192825	-1	INV_TRANS	9
5	50542197	52915766	Emu	9	1786589	2831740	2373570	1045152	1	TRANS	9
5	52998221	54600844	Emu	9	137217	774337	1602624	637121	-1	INV_TRANS	9
5	54628796	56220068	Emu	9	1214641	1704067	1591273	489427	1	TRANS	9
6	636244	23401153	Emu	5	373286	12842270	22764910	12468985	1	Normal	5
6	23458899	60841571	Emu	5	12807155	36692470	37382673	23885316	1	Normal	5
6	60856984	62013982	Emu	5	69802425	70392897	1156999	590473	-1	INV_TRANS	5
6	62016325	71474510	Emu	5	37059040	43042895	9458186	5983856	-1	INV	5
6	72090447	75700669	Emu	5	43104982	45418120	3610223	2313139	-1	INV	5
6	75869232	111274455	Emu	5	45485007	67592823	35405224	22107817	1	Normal	5
6	111413222	111625708	Emu	5	70463349	70597524	212487	134176	-1	INV_TRANS	5
6	111824703	116380762	Emu	5	67608773	69036465	4556060	1427693	1	Normal	5
6	116425042	116620397	Emu	5	69289407	69399159	195356	109753	1	Normal	5
6	116826521	118928983	Emu	5	71414057	72049531	2102463	635475	-1	INV	5
6	119385841	119941730	Emu	5	69080224	69170341	555890	90118	1	TRANS	5
6	120415258	120994489	Emu	5	70902856	71070195	579232	167340	1	TRANS	5
7	52128478	54268155	Emu	6	23549185	24655702	2139678	1106518	1	TRANS	6
7	54368738	56337752	Emu	6	22255198	23514603	1969015	1259406	1	TRANS	6
7	56409763	59591314	Emu	6	20343403	22135762	3181552	1792360	-1	INV	6
7	59742024	60610252	Emu	6	42173852	42415724	868229	241873	1	TRANS	6
7	60756500	90341318	Emu	6	24715620	42101538	29584819	17385919	1	Normal	6
7	90580180	95938852	Emu	6	16929468	20199003	5358673	3269536	-1	INV_TRANS	6
7	96061269	124947999	Emu	6	75108	16844551	28886731	16769444	1	TRANS	6
7	185272	19746182	Emu	12	14533017	26054313	19560911	11521297	1	Normal	12
7	19797507	41347593	Emu	12	4453264	14452816	21550087	9999553	-1	INV_TRANS	12
7	41693101	44552286	Emu	12	2573909	4119595	2859186	1545687	1	TRANS	12
7	44631017	45960908	Emu	12	1295104	1987710	1329892	692607	-1	INV_TRANS	12
7	46229118	46632373	Emu	12	4200596	4329566	403256	128971	-1	INV_TRANS	12
7	46916750	47885037	Emu	12	2085751	2518011	968288	432261	1	TRANS	12
7	48692233	49099465	Emu	12	341566	438087	407233	96522	1	TRANS	12
7	49111264	51263080	Emu	12	764495	1272640	2151817	508146	-1	INV_TRANS	12
7	51455677	51810756	Emu	12	615248	732349	355080	117102	1	TRANS	12
8	482449	2025470	Emu	7	2026753	2703838	1543022	677086	1	TRANS	7
8	3697805	5936573	Emu	7	59927	1182309	2238769	1122383	-1	INV	7
8	6426636	6665749	Emu	7	1440347	1587320	239114	146974	1	Normal	7
8	6795965	14616678	Emu	7	2780936	7021905	7820714	4240970	1	Normal	7
8	14739718	17771678	Emu	7	7071945	8940651	3031961	1868707	-1	INV	7
8	17802486	45235445	Emu	7	8972362	26362398	27432960	17390037	1	Normal	7
8	45281801	74900220	Emu	7	27484361	45274276	29618420	17789916	-1	INV	7
8	75169605	75629108	Emu	7	27285601	27406610	459504	121010	1	TRANS	7
8	75732143	78168114	Emu	7	26372727	27279341	2435972	906615	-1	INV_TRANS	7
9	2946	24123344	Emu	8	11127	13458577	24120399	13447451	-1	Normal	8
9	24195792	30323677	Emu	8	13496109	17506115	6127886	4010007	1	INV_TRANS	8
9	30381658	47426320	Emu	8	17498438	28148447	17044663	10650010	1	INV_TRANS	8
9	47655544	53822348	Emu	8	33608525	37210434	6166805	3601910	-1	TRANS	8
9	53872489	59368870	Emu	8	30977007	33592273	5496382	2615267	1	INV_TRANS	8
9	59388274	65892018	Emu	8	28481212	30962218	6503745	2481007	-1	TRANS	8
9	67745795	70655928	Emu	13	1195126	2327321	2910134	1132196	-1	INV	13
9	70733412	72492229	Emu	13	208415	1115063	1758818	906649	1	TRANS	13
9	72687035	85454897	Emu	13	2558689	10211746	12767863	7653058	1	Normal	13
9	85556172	88486252	Emu	13	14119095	16143421	2930081	2024327	-1	INV	13
9	88592741	100605912	Emu	13	16279472	22869436	12013172	6589965	-1	INV	13
9	100705522	106992877	Emu	13	10244539	14118685	6287356	3874147	1	TRANS	13
9	107004743	107469143	Emu	13	22928137	23132907	464401	204771	1	Normal	13
10	3272	38786156	Emu	10	2597077	25646970	38782885	23049894	-1	Normal	10
10	39010357	45605628	Emu	10	161617	2484241	6595272	2322625	1	INV	10
10	46331954	46482430	Emu	14	16976514	17031834	150477	55321	-1	TRANS	14
10	46569534	49761277	Emu	14	19319916	20843158	3191744	1523243	1	INV	14
10	49804799	54223408	Emu	14	17203941	19179605	4418610	1975665	1	INV	14
10	54257166	54604014	Emu	14	17070331	17193249	346849	122919	1	INV	14
10	54855361	85101245	Emu	14	63073	16956743	30245885	16893671	-1	Normal	14
11	31667	35453151	Emu	11	3274433	25059470	35421485	21785038	-1	Normal	11
11	35749253	35930899	Emu	11	1445584	1555018	181647	109435	-1	TRANS	11
11	36215080	37125074	Emu	11	1779514	2165260	909995	385747	1	INV	11
11	37261206	37387868	Emu	11	3147481	3232534	126663	85054	-1	TRANS	11
11	37420450	38300641	Emu	11	1011404	1389496	880192	378093	1	INV	11
11	38442535	39091829	Emu	11	141693	459299	649295	317607	-1	Normal	11
11	39973782	40760647	Emu	11	2757827	3095644	786866	337818	1	INV_TRANS	11
11	41099110	41344489	Emu	11	803738	902540	245380	98803	1	INV_TRANS	11
11	41522006	42603080	Emu	11	2292166	2618556	1081075	326391	-1	TRANS	11
12	432652	841708	Emu	15	283490	409745	409057	126256	-1	INV	15
12	1721680	2159192	Emu	15	2096196	2188436	437513	92241	1	TRANS	15
12	3407393	3834845	Emu	15	1867846	2050010	427453	182165	-1	INV_TRANS	15
12	4144010	5890635	Emu	15	813765	1809550	1746626	995786	1	Normal	15
12	5986227	8955786	Emu	15	2262274	4018081	2969560	1755808	-1	INV	15
12	9147920	11717076	Emu	15	4066173	5448540	2569157	1382368	1	Normal	15
12	11770694	33155046	Emu	15	5434515	17692378	21384353	12257864	1	Normal	15
13	71314	19756177	Emu	17	2255381	13292193	19684864	11036813	-1	Normal	17
13	20217147	20754268	Emu	17	49562	274871	537122	225310	1	INV_TRANS	17
13	21190272	21557112	Emu	17	2101432	2214299	366841	112868	-1	Normal	17
13	21585631	23350561	Emu	17	1001136	1731811	1764931	730676	1	INV	17
13	23501148	24675891	Emu	17	401221	953496	1174744	552276	1	INV	17
13	24891120	25918580	Emu	17	1748278	2079847	1027461	331570	-1	TRANS	17
14	43521	18792978	Emu	18	22781	9754886	18749458	9732106	1	Normal	18
14	19383802	24172987	Emu	18	11672833	14251376	4789186	2578544	-1	INV	18
14	24277371	24488431	Emu	18	11526379	11648251	211061	121873	1	TRANS	18
14	24665275	26998752	Emu	18	9900037	11360083	2333478	1460047	-1	INV_TRANS	18
15	43096	11814888	Emu	19	350580	6583382	11771793	6232803	-1	Normal	19
15	11855354	12353464	Emu	19	92945	340664	498111	247720	1	INV	19
15	12502719	13279330	Emu	19	6598215	6984412	776612	386198	1	INV_TRANS	19
15	13284053	21371195	Emu	19	7060945	12079636	8087143	5018692	-1	TRANS	19
15	22130712	22714874	Emu	19	12768685	12983485	584163	214801	1	INV_TRANS	19
15	23228179	24824916	Emu	19	12106931	12631508	1596738	524578	-1	TRANS	19
15	24885025	25545292	Emu	19	13057051	13249429	660268	192379	-1	TRANS	19
16	6655780	6777311	Emu	20	17126543	17176569	121532	50027	-1	TRANS	20
16	6832637	7116505	Emu	20	17240378	17397028	283869	156651	1	INV	20
16	7263950	8897367	Emu	20	16418645	17113132	1633418	694488	-1	Normal	20
16	9025629	10296294	Emu	20	14786496	15397451	1270666	610956	1	INV_TRANS	20
16	10468935	10863087	Emu	20	18352923	18529223	394153	176301	-1	TRANS	20
16	11221287	11372339	Emu	20	18106476	18211195	151053	104720	1	INV_TRANS	20
16	11476846	12582734	Emu	20	17476016	18044022	1105889	568007	-1	TRANS	20
16	12863879	13997393	Emu	20	15654923	16289130	1133515	634208	-1	Normal	20
16	14018519	15795665	Emu	20	13642631	14750225	1777147	1107595	1	INV	20
16	15869754	39050650	Emu	20	36691	13601502	23180897	13564812	-1	Normal	20
17	17769	13788626	Emu	21	2600827	9934557	13770858	7333731	-1	Normal	21
17	14466096	18284039	Emu	21	87406	1263039	3817944	1175634	-1	Normal	21
17	18764227	20305503	Emu	21	1361010	1882710	1541277	521701	-1	TRANS	21
17	20657668	23661213	Emu	21	2061056	2470446	3003546	409391	-1	TRANS	21
18	1568859	2015672	Emu	22	5349671	5448195	446814	98525	-1	Normal	22
18	3395428	3846869	Emu	22	5181021	5286804	451442	105784	1	INV	22
18	4430294	4927105	Emu	22	4567833	4642230	496812	74398	-1	TRANS	22
18	5348018	6237526	Emu	22	4642700	5141426	889509	498727	1	INV	22
18	6449791	16436305	Emu	22	33369	4483069	9986515	4449701	-1	Normal	22
19	388	19917765	Emu	23	431695	8844355	19917378	8412661	1	Normal	23
20	1307967	15523371	Emu	24	133055	6814690	14215405	6681636	1	Normal	24
20	15556821	18409168	Emu	24	6820905	8060661	2852348	1239757	-1	INV	24
20	18431272	18763319	Emu	24	8078891	8205126	332048	126236	1	Normal	24
20	18797000	19077229	Emu	24	8219446	8380678	280230	161233	-1	INV	24
20	19105487	19209186	Emu	24	8384401	8439010	103700	54610	1	Normal	24
21	5731888	8240483	Emu	25	2583030	2990847	2508596	407818	1	INV	25
21	8583350	9410647	Emu	25	3038920	3392352	827298	353433	-1	TRANS	25
21	9789102	17092967	Emu	25	27982	2426623	7303866	2398642	-1	Normal	25
22	100817	958264	Emu	26	623656	833442	857448	209787	-1	INV	26
22	2786346	3802694	Emu	26	839890	1260647	1016349	420758	-1	INV	26
22	3819916	4344018	Emu	26	250356	587315	524103	336960	1	TRANS	26
22	4355120	5003951	Emu	26	1376571	1659158	648832	282588	-1	INV	26
22	5062730	5249167	Emu	26	139980	237867	186438	97888	1	TRANS	26
22	5411118	18553843	Emu	26	1909596	7479714	13142726	5570119	1	Normal	26
23	93661	3263716	Emu	27	5218799	6257159	3170056	1038361	1	INV	27
23	5012843	16446595	Emu	27	70491	4667999	11433753	4597509	-1	Normal	27
24	109288	7037155	Emu	28	20537	2671878	6927868	2651342	-1	Normal	28
24	7041687	8723815	Emu	28	2697864	3375459	1682129	677596	1	INV_TRANS	28
24	8803366	13667532	Emu	28	4371833	6321016	4864167	1949184	-1	TRANS	28
24	13770844	15594497	Emu	28	3711936	4356054	1823654	644119	1	INV_TRANS	28
24	15675745	16612918	Emu	28	3411152	3641213	937174	230062	1	INV_TRANS	28
25	5955	2628127	Emu	Z	70621559	71614556	2622173	992998	1	INV_TRANS	Z
25	3360887	4245263	Emu	Z	71751321	72223785	884377	472465	-1	TRANS	Z
25	4358833	21994526	Emu	Z	72281088	82722463	17635694	10441376	1	INV	Z
25	22034449	53978536	Emu	Z	51393142	70601847	31944088	19208706	-1	Normal	Z
25	54012345	54221116	Emu	Z	51257201	51366170	208772	108970	1	INV	Z
25	54322259	98299278	Emu	Z	22127588	51214610	43977020	29087023	-1	Normal	Z
25	98640858	101002456	Emu	Z	5429391	6931529	2361599	1502139	-1	TRANS	Z
25	101118950	111198467	Emu	Z	14660437	21555190	10079518	6894754	1	INV	Z
25	111875215	114178996	Emu	Z	3338538	4789470	2303782	1450933	1	INV_TRANS	Z
25	114390985	116212448	Emu	Z	2178620	3289558	1821464	1110939	1	INV_TRANS	Z
25	117504869	121895765	Emu	Z	11527134	14479635	4390897	2952502	-1	Normal	Z
25	123093863	124029220	Emu	Z	1131251	1677592	935358	546342	-1	TRANS	Z
25	124223895	126057221	Emu	Z	20343	1013405	1833327	993063	1	INV_TRANS	Z
25	126495408	127849339	Emu	Z	7757112	8564236	1353932	807125	-1	TRANS	Z
25	128079035	132260548	Emu	Z	8594060	11254587	4181514	2660528	1	INV	Z
25	132351476	133233871	Emu	Z	7254889	7665881	882396	410993	-1	Normal	Z
1	107322	17725443	Duck	1	201401536	207167928	17618122	5766393	-1	Normal	1
1	17776353	18052443	Duck	1	200913566	201077620	276091	164055	1	INV	1
1	18286006	19760511	Duck	1	199643414	200670808	1474506	1027395	-1	Normal	1
1	19795398	20182818	Duck	1	201127062	201349391	387421	222330	1	INV_TRANS	1
1	20778494	103104254	Duck	1	147148368	199127674	82325761	51979307	-1	Normal	1
1	103203108	106379631	Duck	1	144983909	147070890	3176524	2086982	1	INV	1
1	106414051	136543412	Duck	1	126083450	144950288	30129362	18866839	-1	Normal	1
1	136664567	154663134	Duck	1	114398080	125623368	17998568	11225289	1	INV	1
1	154990572	206409552	Duck	1	82083855	114238421	51418981	32154567	-1	Normal	1
1	206477042	206588995	Duck	1	82007165	82070194	111954	63030	1	INV	1
1	206803387	207170214	Duck	1	81648063	81845736	366828	197674	1	INV	1
1	207498889	207599298	Duck	1	81455814	81533605	100410	77792	-1	Normal	1
1	210323403	212178616	Duck	1	79566551	80734438	1855214	1167888	1	INV	1
1	212890869	215292702	Duck	1	77495620	79016235	2401834	1520616	-1	Normal	1
1	215511004	228481374	Duck	1	68610838	77330902	12970371	8720065	1	INV	1
1	228559257	253967465	Duck	1	52726030	68539929	25408209	15813900	-1	Normal	1
1	253988062	271791987	Duck	1	42481574	52703086	17803926	10221513	1	INV	1
1	271904840	298904989	Duck	1	25993917	42357220	27000150	16363304	-1	Normal	1
1	299186146	299362917	Duck	1	25724959	25789124	176772	64166	1	INV	1
1	299527171	326083470	Duck	1	9240463	25662434	26556300	16421972	-1	Normal	1
1	326092747	326831048	Duck	1	8648676	9237691	738302	589016	1	INV	1
1	326998118	339916837	Duck	1	1116477	8665737	12918720	7549261	-1	Normal	1
1	341159398	342192665	Duck	1	731703	1069794	1033268	338092	1	INV	1
1	343090407	344474415	Duck	1	123287	717005	1384009	593719	-1	Normal	1
2	182240	2370826	Duck	2	12760	553319	2188587	540560	-1	INV	2
2	4001809	68572021	Duck	2	836793	43560765	64570213	42723973	1	Normal	2
2	69510566	79490741	Duck	2	43666193	50655778	9980176	6989586	-1	INV	2
2	79513121	89744589	Duck	2	51142554	57607493	10231469	6464940	-1	INV	2
2	89809646	100541986	Duck	2	57624938	65401814	10732341	7776877	1	Normal	2
2	100860798	103156620	Duck	2	115393989	117052279	2295823	1658291	1	TRANS	2
2	103166704	104074923	Duck	2	65569076	66042240	908220	473165	-1	INV	2
2	104135512	110716150	Duck	2	111033322	115333788	6580639	4300467	-1	INV_TRANS	2
2	111013412	112051243	Duck	2	98878787	99587363	1037832	708577	-1	INV_TRANS	2
2	112350976	116867347	Duck	2	92915658	95871649	4516372	2955992	-1	INV_TRANS	2
2	116938104	134068538	Duck	2	81509323	92907296	17130435	11397974	1	Normal	2
2	134291237	142025867	Duck	2	77559382	81444938	7734631	3885557	-1	INV_TRANS	2
2	143790991	152151162	Duck	2	66112556	70630233	8360172	4517678	-1	INV_TRANS	2
2	152296468	152429970	Duck	2	117059512	117112721	133503	53210	1	TRANS	2
2	153026155	153418360	Duck	2	97330038	97448468	392206	118431	1	Normal	2
2	154084071	164077265	Duck	2	70651581	77353266	9993195	6701686	1	TRANS	2
2	164390697	174486414	Duck	2	103615297	110258208	10095718	6642912	-1	INV	2
2	174761917	179486018	Duck	2	99829796	103518002	4724102	3688207	1	TRANS	2
2	179577808	181255358	Duck	2	96035095	97291828	1677551	1256734	-1	INV_TRANS	2
2	181322835	181975546	Duck	2	97512935	97853752	652712	340818	1	TRANS	2
2	182372737	182926123	Duck	2	98020007	98346800	553387	326794	-1	INV_TRANS	2
2	183313022	265835297	Duck	2	117418707	164528314	82522276	47109608	1	Normal	2
3	66795	418227	Duck	3	12710980	12814269	351433	103290	1	TRANS	3
3	1030522	1166905	Duck	3	12604436	12687204	136384	82769	1	TRANS	3
3	1296971	1757443	Duck	3	13259215	13846398	460473	587184	1	TRANS	3
3	2447114	2789729	Duck	3	1255396	1369785	342616	114390	-1	INV_TRANS	3
3	3221684	3607723	Duck	3	13028415	13134072	386040	105658	-1	INV_TRANS	3
3	3810781	4064755	Duck	3	12419486	12558548	253975	139063	-1	INV_TRANS	3
3	4325607	6000292	Duck	3	441811	1116943	1674686	675133	-1	INV	3
3	6014915	6398786	Duck	3	81982	309111	383872	227130	1	TRANS	3
3	6770091	7197869	Duck	3	14072537	14239068	427779	166532	-1	INV_TRANS	3
3	7761709	8036341	Duck	3	12176823	12335949	274633	159127	-1	INV_TRANS	3
3	8073312	10491682	Duck	3	4561530	5976840	2418371	1415311	1	TRANS	3
3	10921702	14596304	Duck	3	7060822	9275213	3674603	2214392	-1	INV_TRANS	3
3	15043074	18992388	Duck	3	9659018	12040281	3949315	2381264	-1	INV_TRANS	3
3	20115984	26064874	Duck	3	1910028	4541772	5948891	2631745	-1	INV	3
3	26140132	31133613	Duck	3	14381754	16786245	4993482	2404492	-1	INV	3
3	31222529	32141969	Duck	3	1471958	1845392	919441	373435	1	TRANS	3
3	32652231	40501524	Duck	3	36985404	41557884	7849294	4572481	1	TRANS	3
3	40544162	42463701	Duck	3	23561747	24534828	1919540	973082	-1	INV_TRANS	3
3	42573258	51173989	Duck	3	18539385	23487746	8600732	4948362	1	Normal	3
3	51250139	54575718	Duck	3	16992247	18527156	3325580	1534910	-1	INV_TRANS	3
3	54650553	75810642	Duck	3	24761594	36955792	21160090	12194199	-1	INV	3
3	75955774	88305261	Duck	3	41597370	49059312	12349488	7461943	1	Normal	3
3	88602710	99179944	Duck	3	49222170	55819694	10577235	6597525	-1	INV	3
3	99446144	106963704	Duck	3	55985382	60730345	7517561	4744964	1	Normal	3
3	107026451	190744847	Duck	3	60725838	113269594	83718397	52543757	1	Normal	3
3	191180814	193101066	Duck	3	113323397	114517064	1920253	1193668	-1	INV	3
3	193545088	205891431	Duck	3	114854842	120070712	12346344	5215871	1	Normal	3
4	1726376	8509211	Duck	4	12083276	14804878	6782836	2721603	1	INV_TRANS	4
4	8654663	9334587	Duck	4	15971132	16270515	679925	299384	-1	TRANS	4
4	9767525	9899427	Duck	4	46347578	46408244	131903	60667	-1	TRANS	4
4	10290554	11498143	Duck	4	46450469	47132888	1207590	682420	1	INV_TRANS	4
4	11974491	13898603	Duck	4	14905061	15948569	1924113	1043509	1	INV_TRANS	4
4	14064906	15528751	Duck	4	45552821	46264452	1463846	711632	-1	TRANS	4
4	16128415	16536071	Duck	4	44421828	44549790	407657	127963	1	INV_TRANS	4
4	16804679	17292036	Duck	4	439171	807746	487358	368576	-1	TRANS	4
4	17384673	17589375	Duck	4	139198	274134	204703	134937	1	INV_TRANS	4
4	18166040	19417935	Duck	4	44736075	45304527	1251896	568453	1	INV_TRANS	4
4	19575961	37713872	Duck	4	889954	11727035	18137912	10837082	-1	TRANS	4
4	37826939	85775508	Duck	4	16338742	44247683	47948570	27908942	-1	TRANS	4
4	86060963	140508675	Duck	4	47230375	76153302	54447713	28922928	1	INV	4
5	183597	28402808	Duck	9	126486	13107055	28219212	12980570	-1	Normal	9
5	28597314	42894483	Duck	9	18336815	26389193	14297170	8052379	-1	TRANS	9
5	43102667	45218890	Duck	9	13143891	14324271	2116224	1180381	1	INV_TRANS	9
5	45417766	49427877	Duck	9	16192546	18251130	4010112	2058585	-1	TRANS	9
5	49916760	50488941	Duck	9	14402685	14485496	572182	82812	-1	TRANS	9
5	50542243	52915755	Duck	9	15411157	16183986	2373513	772830	1	INV_TRANS	9
5	53158630	54600843	Duck	9	14886210	15285301	1442214	399092	-1	TRANS	9
5	54626219	56219937	Duck	9	14546466	14876107	1593719	329642	1	INV_TRANS	9
5	56323363	57400373	Duck	10	6327002	6603577	1077011	276576	1	Normal	4a
5	57489336	57766222	Duck	10	12292501	12373643	276887	81143	1	TRANS	4a
5	59653280	60744685	Duck	10	7163313	7346549	1091406	183237	1	Normal	4a
5	61230927	61392205	Duck	10	6261095	6323148	161279	62054	-1	INV_TRANS	4a
5	62863257	64451863	Duck	10	11724778	12285481	1588607	560704	1	Normal	4a
5	64583243	79684262	Duck	10	15918676	22315850	15101020	6397175	1	Normal	4a
5	79950959	84861070	Duck	10	3319623	6035892	4910112	2716270	-1	INV_TRANS	4a
5	84887572	89015769	Duck	10	41602	2609709	4128198	2568108	1	TRANS	4a
5	89032899	93535326	Duck	10	7867172	10510908	4502428	2643737	-1	INV_TRANS	4a
5	93884079	95570724	Duck	10	10682327	11677357	1686646	995031	1	TRANS	4a
5	95651022	102810094	Duck	10	12383793	15878791	7159073	3494999	-1	INV_TRANS	4a
6	1352372	23401153	Duck	5	471964	12019081	22048782	11547118	1	Normal	5
6	23458899	48433909	Duck	5	11985966	27032618	24975011	15046653	1	Normal	5
6	48538211	60793412	Duck	5	39166693	46546268	12255202	7379576	-1	INV	5
6	60857001	62013978	Duck	5	31565895	32092599	1156978	526705	1	TRANS	5
6	62070241	71676994	Duck	5	33643401	38933985	9606754	5290585	1	TRANS	5
6	72119308	73611005	Duck	5	53699968	54519001	1491698	819034	1	TRANS	5
6	73614233	75728242	Duck	5	32500000	33549587	2114010	1049588	1	TRANS	5
6	75869285	85385339	Duck	5	47927536	53567403	9516055	5639868	-1	INV	5
6	85463981	95352120	Duck	5	54908646	61324008	9888140	6415363	1	Normal	5
6	95425017	104687755	Duck	5	61380743	66641661	9262739	5260919	-1	INV	5
6	104823554	109630332	Duck	5	27555967	30396086	4806779	2840120	-1	INV_TRANS	5
6	109751339	111274455	Duck	5	46798180	47594445	1523117	796266	-1	INV_TRANS	5
6	111311842	111685797	Duck	5	31326445	31498868	373956	172424	1	TRANS	5
6	111919302	112332979	Duck	5	46591234	46748581	413678	157348	-1	INV_TRANS	5
6	112349406	113286101	Duck	5	27042717	27528154	936696	485438	1	TRANS	5
6	113368689	113934711	Duck	5	47661993	47804941	566023	142949	1	TRANS	5
6	114130096	116279509	Duck	5	32168487	32436343	2149414	267857	1	TRANS	5
6	116428435	116611750	Duck	5	54805496	54890740	183316	85245	1	TRANS	5
6	116880593	118854079	Duck	5	30544541	30908504	1973487	363964	-1	INV_TRANS	5
6	119370969	119941731	Duck	5	54643314	54735733	570763	92420	1	TRANS	5
6	120700397	121000746	Duck	5	31115826	31177880	300350	62055	1	TRANS	5
7	52128449	54168139	Duck	6	15738975	16674178	2039691	935204	-1	TRANS	6
7	54368738	56310702	Duck	6	16743933	17752741	1941965	1008809	-1	TRANS	6
7	56399815	59446311	Duck	6	17796914	19391113	3046497	1594200	1	INV	6
7	60232776	60610228	Duck	6	96203	196380	377453	100178	-1	TRANS	6
7	60767691	90182352	Duck	6	358769	15617087	29414662	15258319	-1	Normal	6
7	90499107	95975149	Duck	6	19519478	22832804	5476043	3313327	1	INV_TRANS	6
7	96059985	124699146	Duck	6	22972318	37829095	28639162	14856778	-1	TRANS	6
7	267688	19701739	Duck	13	151526	10210591	19434052	10059066	-1	Normal	12
7	19792337	25223717	Duck	13	10344843	13203318	5431381	2858476	1	INV_TRANS	12
7	25315291	41358005	Duck	13	16581521	22858249	16042715	6276729	-1	TRANS	12
7	41677362	44248857	Duck	13	14468692	15664740	2571496	1196049	1	INV_TRANS	12
7	44631017	46593456	Duck	13	13390989	14079473	1962440	688485	-1	TRANS	12
7	46916750	47885014	Duck	13	14110644	14440023	968265	329380	1	INV_TRANS	12
7	49111269	51251682	Duck	13	16111913	16422649	2140414	310737	1	INV_TRANS	12
7	51455679	51800922	Duck	13	15847201	15945703	345244	98503	1	INV_TRANS	12
8	487161	1839866	Duck	7	27906609	28295382	1352706	388774	-1	TRANS	7
8	2116891	2563897	Duck	7	28341741	28447714	447007	105974	1	INV_TRANS	7
8	3706885	5520045	Duck	7	28594839	29366973	1813161	772135	-1	TRANS	7
8	6605383	13738112	Duck	7	29589629	33057612	7132730	3467984	1	INV_TRANS	7
8	14446873	14564279	Duck	7	25410322	25480194	117407	69873	1	INV_TRANS	7
8	14831393	17778186	Duck	7	25537734	27253086	2946794	1715353	-1	TRANS	7
8	17812284	18822967	Duck	7	27341677	27869502	1010684	527826	1	INV_TRANS	7
8	18990998	30523774	Duck	7	33222739	39428116	11532777	6205378	-1	Normal	7
8	30630218	45187174	Duck	7	16747028	25398801	14556957	8651774	-1	Normal	7
8	45281806	58033855	Duck	7	45117	6208663	12752050	6163547	1	INV	7
8	58354436	64539167	Duck	7	7687642	11164905	6184732	3477264	-1	TRANS	7
8	64583236	72993984	Duck	7	11355041	16361830	8410749	5006790	-1	TRANS	7
8	73071182	76697017	Duck	7	6265802	7683762	3625836	1417961	1	INV_TRANS	7
8	76700911	78168114	Duck	7	16386265	16716615	1467204	330351	1	INV_TRANS	7
9	2977	24124133	Duck	8	20736290	32578994	24121157	11842705	1	Normal	8
9	24268334	32109980	Duck	8	15726241	20651259	7841647	4925019	-1	INV_TRANS	8
9	32205765	47524090	Duck	8	5016	8512764	15318326	8507749	1	TRANS	8
9	48642703	53194768	Duck	8	13168772	15718497	4552066	2549726	1	TRANS	8
9	53235748	53818526	Duck	8	12774684	12979136	582779	204453	-1	INV_TRANS	8
9	53872612	59368167	Duck	8	10608387	12759873	5495556	2151487	1	TRANS	8
9	59391307	66544349	Duck	8	8647687	10586090	7153043	1938404	-1	INV_TRANS	8
9	68828775	70669525	Duck	14	12378384	13143831	1840751	765448	-1	INV_TRANS	13
9	70789071	72492229	Duck	14	11579250	12332496	1703159	753247	1	TRANS	13
9	72715638	85882511	Duck	14	13595249	20694558	13166874	7099310	1	TRANS	13
9	85914936	88479741	Duck	14	9961710	11552566	2564806	1590857	-1	INV_TRANS	13
9	88574404	106992877	Duck	14	248021	9955809	18418474	9707789	1	Normal	13
9	107004743	107173531	Duck	14	156880	226117	168789	69238	-1	INV_TRANS	13
10	3279	19627757	Duck	11	11898583	22516739	19624479	10618157	-1	Normal	10
10	19928464	22500980	Duck	11	318678	2358524	2572517	2039847	-1	TRANS	10
10	22588988	37621781	Duck	11	2480499	9673468	15032794	7192970	1	INV	10
10	38092443	38819107	Duck	11	9816759	9953344	726665	136586	-1	TRANS	10
10	39233832	43909261	Duck	11	10130330	11591815	4675430	1461486	-1	TRANS	10
10	46569534	46679418	Duck	15	2211895	2268781	109885	56887	-1	INV	14
10	46790262	47657640	Duck	15	4419159	4690971	867379	271813	1	TRANS	14
10	47810068	49688393	Duck	15	4925518	5494688	1878326	569171	-1	INV_TRANS	14
10	49804935	54133229	Duck	15	5710060	7120090	4328295	1410031	1	TRANS	14
10	54257233	54604014	Duck	15	5603788	5699082	346782	95295	1	TRANS	14
10	54857153	55276283	Duck	15	4709034	4886016	419131	176983	1	TRANS	14
10	55880221	59304467	Duck	15	2344209	4396342	3424247	2052134	1	Normal	14
10	59444176	63209230	Duck	15	140989	2142284	3765055	2001296	-1	INV_TRANS	14
10	63292022	85181697	Duck	15	7213161	17801379	21889676	10588219	1	Normal	14
11	10360	20301804	Duck	12	134426	11137524	20291445	11003099	1	Normal	11
11	20428060	35476870	Duck	12	13123851	21543805	15048811	8419955	-1	INV	11
11	35497310	35933139	Duck	12	11549263	11726873	435830	177611	1	TRANS	11
11	36215080	37059632	Duck	12	11195357	11443316	844553	247960	1	TRANS	11
11	37262449	37387868	Duck	12	12486735	12556033	125420	69299	1	TRANS	11
11	37581137	38187072	Duck	12	12286386	12464117	605936	177732	1	TRANS	11
11	38336130	38885667	Duck	12	11861912	12065321	549538	203410	-1	INV_TRANS	11
11	40123455	40722088	Duck	12	12592282	12749919	598634	157638	-1	INV_TRANS	11
11	41086572	41237054	Duck	12	12107256	12169464	150483	62209	1	TRANS	11
11	41485748	42609545	Duck	12	12857704	13106736	1123798	249033	1	TRANS	11
12	432681	1787684	Duck	16	5459666	5772139	1355004	312474	1	TRANS	15
12	3407393	3639085	Duck	16	4276574	4349662	231693	73089	1	Normal	15
12	4798648	5700353	Duck	16	4566928	4932216	901706	365289	-1	INV	15
12	5974322	8918229	Duck	16	5873919	7358540	2943908	1484622	-1	INV	15
12	9147920	23462210	Duck	16	7384237	15537020	14314291	8152784	1	Normal	15
12	23537736	33156766	Duck	16	14248	4222901	9619031	4208654	-1	INV_TRANS	15
13	243802	6972755	Duck	18	8883470	12037186	6728954	3153717	-1	Normal	17
13	7127600	13486844	Duck	18	5792223	8839790	6359245	3047568	1	INV	17
13	13545565	19420017	Duck	18	2428160	5758786	5874453	3330627	-1	Normal	17
13	20219661	20754268	Duck	18	325728	565069	534608	239342	1	INV_TRANS	17
13	21585631	23352159	Duck	18	1189961	1797708	1766529	607748	1	INV	17
13	23501148	24690062	Duck	18	669908	1152626	1188915	482719	1	INV	17
13	24891118	25918594	Duck	18	1810630	2134780	1027477	324151	-1	TRANS	17
14	43529	8559562	Duck	19	21202	3789674	8516034	3768473	1	Normal	18
14	8563708	13954573	Duck	19	3819846	6753613	5390866	2933768	-1	INV	18
14	14199169	20547845	Duck	19	6775316	9578249	6348677	2802934	-1	INV	18
14	20623856	27042401	Duck	19	9595696	12979345	6418546	3383650	1	Normal	18
15	160593	11795753	Duck	20	289389	5827899	11635161	5538511	-1	Normal	19
15	11855426	12353463	Duck	20	116724	280932	498038	164209	1	INV	19
15	12502706	13279330	Duck	20	5885175	6288674	776625	403500	1	INV_TRANS	19
15	13299588	21371195	Duck	20	6340649	10899152	8071608	4558504	-1	TRANS	19
15	22093416	22710943	Duck	20	11460644	11637576	617528	176933	1	INV_TRANS	19
15	23242003	23825291	Duck	20	11114506	11334021	583289	219516	-1	TRANS	19
16	6591813	6794440	Duck	21	12966712	13031586	202628	64875	-1	TRANS	20
16	6920002	7116491	Duck	21	13088092	13189480	196490	101389	1	INV	20
16	7283556	8694794	Duck	21	12447935	12947849	1411239	499915	-1	Normal	20
16	9006489	11095186	Duck	21	3414223	4055500	2088698	641278	-1	TRANS	20
16	11221296	11372396	Duck	21	3302173	3378496	151101	76324	1	INV_TRANS	20
16	11423733	12357708	Duck	21	2302408	3271147	933976	968740	-1	TRANS	20
16	12431903	12600947	Duck	21	188895	254511	169045	65617	1	INV_TRANS	20
16	12614535	13676130	Duck	21	12000526	12384108	1061596	383583	-1	Normal	20
16	14023580	15739742	Duck	21	4104077	5019298	1716163	915222	-1	TRANS	20
16	15836189	18469496	Duck	21	5030894	6702096	2633308	1671203	1	INV_TRANS	20
16	18555120	22392202	Duck	21	343848	2269490	3837083	1925643	-1	TRANS	20
16	22440990	30752247	Duck	21	6831549	11925131	8311258	5093583	-1	Normal	20
16	30795445	39050664	Duck	21	13434040	16902955	8255220	3468916	1	INV_TRANS	20
17	17765	214894	Duck	22	2263739	2335243	197130	71505	1	INV_TRANS	21
17	339730	6599561	Duck	22	27239	2226562	6259832	2199324	-1	TRANS	21
17	6652290	10167353	Duck	22	2377724	3894196	3515064	1516473	-1	TRANS	21
17	10263675	15097666	Duck	22	3917303	6209074	4833992	2291772	1	INV	21
17	15110055	18428798	Duck	22	6580095	7540105	3318744	960011	1	INV_TRANS	21
17	18755622	19613499	Duck	22	6237918	6532045	857878	294128	-1	TRANS	21
17	19741050	23661227	Duck	22	7550110	8346606	3920178	796497	-1	TRANS	21
18	3395433	6237523	Duck	23	4391870	5136686	2842091	744817	-1	Normal	22
18	6415296	6985343	Duck	23	3297209	3531206	570048	233998	1	INV_TRANS	22
18	7019935	8236987	Duck	23	3539362	4159094	1217053	619733	-1	Normal	22
18	8337153	16445908	Duck	23	169094	3265496	8108756	3096403	-1	Normal	22
19	145290	10487811	Duck	24	3528946	7397894	10342522	3868949	-1	Normal	23
19	10508606	19917761	Duck	24	4778	3521981	9409156	3517204	1	INV	23
20	1021025	2281573	Duck	25	224849	370389	1260549	145541	-1	INV	24
20	2674338	10120490	Duck	25	439598	3577072	7446153	3137475	1	Normal	24
20	10122737	13871605	Duck	25	3589673	5504998	3748869	1915326	-1	INV	24
20	13886396	15521569	Duck	25	6931835	7649543	1635174	717709	-1	INV_TRANS	24
20	15531421	18137540	Duck	25	5776593	6832598	2606120	1056006	1	Normal	24
20	18432973	18754153	Duck	25	5672591	5775731	321181	103141	-1	INV_TRANS	24
20	18796992	19094312	Duck	25	5549326	5669196	297321	119871	1	TRANS	24
21	8644608	9259703	Duck	26	1048381	1257293	615096	208913	-1	INV_TRANS	25
21	9919476	10025122	Duck	26	1322338	1373518	105647	51181	1	TRANS	25
21	10175400	11604723	Duck	26	336762	651506	1429324	314745	1	Normal	25
21	12343216	13350658	Duck	26	10698	320784	1007443	310087	-1	INV_TRANS	25
21	13964704	17092967	Duck	26	1407864	2756114	3128264	1348251	1	Normal	25
22	100853	993114	Duck	27	4089331	4263847	892262	174517	1	INV_TRANS	26
22	1387230	2224433	Duck	27	752979	873781	837204	120803	1	INV_TRANS	26
22	2620480	3499802	Duck	27	3707494	4034906	879323	327413	1	INV_TRANS	26
22	4059861	4344054	Duck	27	4275556	4438250	284194	162695	-1	TRANS	26
22	4383420	4550067	Duck	27	960847	1052553	166648	91707	1	INV_TRANS	26
22	4560210	5003951	Duck	27	3571362	3696939	443742	125578	1	INV_TRANS	26
22	5063001	5249182	Duck	27	2121822	2183435	186182	61614	1	INV_TRANS	26
22	5619566	6588150	Duck	27	71392	623205	968585	551814	-1	TRANS	26
22	6944628	9352480	Duck	27	1060532	2042602	2407853	982071	-1	TRANS	26
22	9506892	12370932	Duck	27	2287703	3484763	2864041	1197061	-1	TRANS	26
22	12422418	12525455	Duck	27	4447256	4516317	103038	69062	1	INV_TRANS	26
22	12611028	17494661	Duck	27	4527327	6339884	4883634	1812558	-1	Normal	26
22	17538126	18553795	Duck	27	6385951	6770800	1015670	384850	1	INV_TRANS	26
23	206019	3223607	Duck	28	5215865	6134595	3017589	918731	-1	Normal	27
23	3824652	5238378	Duck	28	6260549	6829930	1413727	569382	1	INV_TRANS	27
23	5537615	7934829	Duck	28	3021270	3917413	2397215	896144	-1	Normal	27
23	8962670	9541980	Duck	28	1304770	1589496	579311	284727	1	INV	27
23	9578841	13173625	Duck	28	6924	1287037	3594785	1280114	1	INV	27
23	13482724	16405416	Duck	28	1610400	2882426	2922693	1272027	-1	TRANS	27
24	84922	7017107	Duck	29	21953	2342436	6932186	2320484	-1	Normal	28
24	7048234	9099630	Duck	29	2365934	3198172	2051397	832239	1	INV_TRANS	28
24	9267680	13664761	Duck	29	4160438	5649755	4397082	1489318	-1	TRANS	28
24	13902407	14506145	Duck	29	3232796	3440432	603739	207637	-1	TRANS	28
24	14584033	15599342	Duck	29	3869068	4148646	1015310	279579	1	INV_TRANS	28
24	15675745	16612919	Duck	29	3583042	3812436	937175	229395	-1	TRANS	28
25	88314	2488284	Duck	Z	10124456	10893895	2399971	769440	-1	INV_TRANS	Z
25	3361011	4245262	Duck	Z	9449821	9851787	884252	401967	1	TRANS	Z
25	4489605	7395273	Duck	Z	7440794	9335852	2905669	1895059	-1	INV_TRANS	Z
25	7442304	7512896	Duck	Z	7038850	7111701	70593	72852	1	TRANS	Z
25	7676312	7837115	Duck	Z	6899666	7027333	160804	127668	-1	INV_TRANS	Z
25	7900436	8196447	Duck	Z	4624221	4847474	296012	223254	1	TRANS	Z
25	8219549	8329185	Duck	Z	4982591	5099564	109637	116974	1	TRANS	Z
25	8343449	8494260	Duck	Z	4858585	4964767	150812	106183	1	TRANS	Z
25	8509471	10715241	Duck	Z	5252573	6869755	2205771	1617183	1	TRANS	Z
25	10741592	21953354	Duck	Z	98422	4616885	11211763	4518464	-1	INV	Z
25	22008689	49876240	Duck	Z	10914324	27838035	27867552	16923712	1	Normal	Z
25	50282267	51107731	Duck	Z	76604812	77022711	825465	417900	-1	INV_TRANS	Z
25	51151453	61268785	Duck	Z	77045394	83741600	10117333	6696207	1	TRANS	Z
25	61422062	72233159	Duck	Z	56178316	63319540	10811098	7141225	1	TRANS	Z
25	72566848	79167367	Duck	Z	63430520	68107889	6600520	4677370	-1	INV_TRANS	Z
25	79303550	94193314	Duck	Z	40234271	50985110	14889765	10750840	-1	INV	Z
25	94411095	95245584	Duck	Z	37296989	37942129	834490	645141	1	TRANS	Z
25	95475041	98228039	Duck	Z	38042398	39979027	2752999	1936630	-1	INV_TRANS	Z
25	98264985	98467925	Duck	Z	37045670	37176581	202941	130912	1	TRANS	Z
25	98614679	111198467	Duck	Z	27886386	37020482	12583789	9134097	1	TRANS	Z
25	111981379	113328485	Duck	Z	72378778	73274572	1347107	895795	-1	INV_TRANS	Z
25	113458382	113557707	Duck	Z	72217806	72291304	99326	73499	1	TRANS	Z
25	113609463	117162824	Duck	Z	69646934	72190196	3553362	2543263	-1	INV_TRANS	Z
25	117487253	120873375	Duck	Z	73361621	75396899	3386123	2035279	1	TRANS	Z
25	122939113	124029220	Duck	Z	83958070	84461347	1090108	503278	-1	INV_TRANS	Z
25	124710997	126088204	Duck	Z	55055574	55788440	1377208	732867	-1	INV_TRANS	Z
25	126495408	127967453	Duck	Z	54129999	54940973	1472046	810975	1	TRANS	Z
25	128079054	132238592	Duck	Z	51243804	54109893	4159539	2866090	-1	INV	Z
25	132462710	133233875	Duck	Z	69261068	69528833	771166	267766	-1	INV	Z
1	118194	371793	GreaterPrairie	1	184039404	184116722	253600	77319	1	INV_TRANS	1
1	5027728	5444049	GreaterPrairie	1	183719864	183817985	416322	98122	-1	TRANS	1
1	8164156	11702222	GreaterPrairie	1	184176212	185236344	3538067	1060133	1	INV	1
1	12045181	17725456	GreaterPrairie	1	180171333	183595332	5680276	3424000	-1	Normal	1
1	17767507	20182806	GreaterPrairie	1	178660535	180123608	2415300	1463074	1	INV	1
1	20270661	103134388	GreaterPrairie	1	132777460	178656477	82863728	45879018	-1	Normal	1
1	103210336	106379631	GreaterPrairie	1	130860699	132743158	3169296	1882460	1	INV	1
1	106413772	203914874	GreaterPrairie	1	74431368	130824756	97501103	56393389	-1	Normal	1
1	204149192	206409560	GreaterPrairie	1	72604558	73459080	2260369	854523	1	INV	1
1	206686692	207170214	GreaterPrairie	1	73586841	73829773	483523	242933	-1	TRANS	1
1	207495320	208930968	GreaterPrairie	1	73898898	74276943	1435649	378046	1	INV_TRANS	1
1	210323397	210762980	GreaterPrairie	1	72224678	72409159	439584	184482	-1	Normal	1
1	212983221	215114841	GreaterPrairie	1	70256409	71362426	2131621	1106018	1	INV	1
1	215827302	325769021	GreaterPrairie	1	8530772	70080434	109941720	61549663	-1	Normal	1
1	326105391	326831019	GreaterPrairie	1	7825974	8349153	725629	523180	1	INV	1
1	326998118	341744275	GreaterPrairie	1	314124	7832827	14746158	7518704	-1	Normal	1
2	465838	762509	GreaterPrairie	2B	50005	165867	296672	115863	-1	INV	2
2	2201605	45184646	GreaterPrairie	2B	218686	23180073	42983042	22961388	1	Normal	2
2	45425073	45592525	GreaterPrairie	2B	23243773	23323811	167453	80039	-1	INV	2
2	45709094	100541986	GreaterPrairie	2B	23460738	55888082	54832893	32427345	1	Normal	2
2	100860815	103156614	GreaterPrairie	2B	86298781	87766443	2295800	1467663	1	TRANS	2
2	103249855	104048113	GreaterPrairie	2B	56042607	56449529	798259	406923	-1	INV	2
2	104135515	142047865	GreaterPrairie	2B	65878790	86245607	37912351	20366818	-1	INV	2
2	143790991	152108804	GreaterPrairie	2B	56547134	60377624	8317814	3830491	-1	INV_TRANS	2
2	152296467	152577476	GreaterPrairie	2B	87776935	87871211	281010	94277	1	Normal	2
2	153026154	153683270	GreaterPrairie	2B	88044566	88240991	657117	196426	-1	INV	2
2	154084072	164135862	GreaterPrairie	2B	60401520	65736465	10051791	5334946	1	TRANS	2
2	164587892	165869912	GreaterPrairie	2B	88592764	88894079	1282021	301316	1	Normal	2
2	167302343	170271296	GreaterPrairie	2B	89188391	90185993	2968954	997603	-1	INV	2
2	170748193	174485850	GreaterPrairie	2A	47022884	49584454	3737658	2561571	-1	Normal	2
2	174843546	179486018	GreaterPrairie	2A	44139867	46984758	4642473	2844892	1	INV	2
2	179486577	253818376	GreaterPrairie	2A	3979938	44107471	74331800	40127534	-1	Normal	2
2	254433439	260979987	GreaterPrairie	2A	776134	3726327	6546549	2950194	1	INV	2
2	261183970	265700880	GreaterPrairie	2A	97781	752594	4516911	654814	-1	Normal	2
3	2447111	2789749	GreaterPrairie	3	2937729	3045338	342639	107610	1	Normal	3
3	2983994	3607716	GreaterPrairie	3	4007432	4203845	623723	196414	1	TRANS	3
3	3652996	4148835	GreaterPrairie	3	14851831	15690225	495840	838395	1	TRANS	3
3	4289660	6000296	GreaterPrairie	3	3142090	3700379	1710637	558290	1	Normal	3
3	6014016	6157617	GreaterPrairie	3	3869903	3946376	143602	76474	-1	INV	3
3	6745647	7197869	GreaterPrairie	3	14330620	14508039	452223	177420	1	TRANS	3
3	7740034	8036341	GreaterPrairie	3	15706381	15873425	296308	167045	1	TRANS	3
3	8073298	12719908	GreaterPrairie	3	11640970	14282754	4646611	2641785	-1	INV	3
3	12779358	14613010	GreaterPrairie	3	4274144	5359050	1833653	1084907	1	TRANS	3
3	15121208	19573277	GreaterPrairie	3	5597216	7918680	4452070	2321465	-1	INV_TRANS	3
3	20368148	26082509	GreaterPrairie	3	16240	2442654	5714362	2426415	1	TRANS	3
3	26143944	26746375	GreaterPrairie	3	8132030	8307589	602432	175560	-1	INV_TRANS	3
3	27011025	30716638	GreaterPrairie	3	9404945	11118107	3705614	1713163	1	TRANS	3
3	31299316	32141969	GreaterPrairie	3	2485615	2832175	842654	346561	-1	INV_TRANS	3
3	32807978	51653066	GreaterPrairie	3	15968635	25915438	18845089	9946804	-1	INV	3
3	51896123	52403444	GreaterPrairie	3	11361470	11601516	507322	240047	-1	INV_TRANS	3
3	52715250	54625189	GreaterPrairie	3	8436246	9356439	1909940	920194	-1	INV_TRANS	3
3	54650553	88290744	GreaterPrairie	3	26018205	44223835	33640192	18205631	1	Normal	3
3	88648917	99148241	GreaterPrairie	3	44400636	50371916	10499325	5971281	-1	INV	3
3	99446144	189229772	GreaterPrairie	3	50527152	100952432	89783629	50425281	1	Normal	3
3	189327672	200944322	GreaterPrairie	3	101971011	107208547	11616651	5237537	-1	INV	3
3	201077557	202439147	GreaterPrairie	3	101676267	101945938	1361591	269672	1	TRANS	3
3	202946113	205539984	GreaterPrairie	3	101036215	101585552	2593872	549338	-1	INV_TRANS	3
4	1735738	1970626	GreaterPrairie	4B	40624185	40706859	234889	82675	1	INV_TRANS	4
4	2619883	2797354	GreaterPrairie	4B	42650267	42708278	177472	58012	1	INV_TRANS	4
4	3094189	6733947	GreaterPrairie	4B	40759640	42529148	3639759	1769509	-1	TRANS	4
4	7002790	8469406	GreaterPrairie	4B	38134742	38860454	1466617	725713	-1	TRANS	4
4	8629948	8922354	GreaterPrairie	4B	55194763	55349352	292407	154590	1	INV	4
4	9156861	9332318	GreaterPrairie	4B	54699168	54768254	175458	69087	-1	Normal	4
4	10828863	13317987	GreaterPrairie	4B	39014108	40255693	2489125	1241586	1	INV_TRANS	4
4	13513673	13898273	GreaterPrairie	4B	54436029	54662455	384601	226427	1	INV	4
4	14064905	15528735	GreaterPrairie	4B	44337691	44898966	1463831	561276	-1	TRANS	4
4	16128405	16536071	GreaterPrairie	4B	43395438	43540884	407667	145447	1	INV_TRANS	4
4	16679447	17376989	GreaterPrairie	4B	42988968	43364559	697543	375592	-1	TRANS	4
4	17384673	17589376	GreaterPrairie	4B	42832835	42939974	204704	107140	1	INV_TRANS	4
4	18618696	19354212	GreaterPrairie	4B	43922678	44172946	735517	250269	1	INV_TRANS	4
4	19575961	23150802	GreaterPrairie	4B	52291275	54391270	3574842	2099996	-1	Normal	4
4	23484921	28477880	GreaterPrairie	4B	29031311	31750153	4992960	2718843	-1	TRANS	4
4	28695517	32037683	GreaterPrairie	4B	50311531	52181558	3342167	1870028	1	INV	4
4	32125799	42862571	GreaterPrairie	4B	31834805	38076440	10736773	6241636	1	INV	4
4	43021737	43718546	GreaterPrairie	4B	54838196	55146507	696810	308312	-1	TRANS	4
4	43978859	47100764	GreaterPrairie	4B	61388079	63298807	3121906	1910729	-1	TRANS	4
4	47141158	47757466	GreaterPrairie	4B	61067136	61376691	616309	309556	1	INV_TRANS	4
4	48172079	58034299	GreaterPrairie	4B	55420191	60931149	9862221	5510959	-1	TRANS	4
4	58183353	68069983	GreaterPrairie	4B	63671619	68483780	9886631	4812162	-1	TRANS	4
4	68094564	68634419	GreaterPrairie	4B	63362929	63564314	539856	201386	1	INV_TRANS	4
4	69007881	73409345	GreaterPrairie	4B	45295476	47282362	4401465	1986887	-1	TRANS	4
4	73825427	79235958	GreaterPrairie	4B	47367320	50267037	5410532	2899718	1	INV_TRANS	4
4	79240169	137340968	GreaterPrairie	4B	233072	29024281	58100800	28791210	-1	Normal	4
4	139228960	140590197	GreaterPrairie	4B	33881	198562	1361238	164682	1	INV	4
5	56323363	57400367	GreaterPrairie	4A	7777042	8041873	1077005	264832	1	INV_TRANS	4a
5	57489336	57766201	GreaterPrairie	4A	16685791	16763541	276866	77751	-1	TRANS	4a
5	59745110	61120162	GreaterPrairie	4A	17134582	17334805	1375053	200224	1	INV	4a
5	62863257	63254667	GreaterPrairie	4A	8214634	8415726	391411	201093	-1	TRANS	4a
5	63639186	64432349	GreaterPrairie	4A	16781371	16979282	793164	197912	-1	Normal	4a
5	64621630	75244244	GreaterPrairie	4A	9535468	13738906	10622615	4203439	-1	Normal	4a
5	75559451	79684184	GreaterPrairie	4A	17339109	18749891	4124734	1410783	1	INV_TRANS	4a
5	79976006	93485019	GreaterPrairie	4A	147955	7521199	13509014	7373245	-1	Normal	4a
5	93922143	95557485	GreaterPrairie	4A	8457632	9349394	1635343	891763	-1	TRANS	4a
5	95643683	102810004	GreaterPrairie	4A	13780416	16675592	7166322	2895177	1	INV_TRANS	4a
5	1930	28376244	GreaterPrairie	9	44871	11386018	28374315	11341148	-1	Normal	9
5	28597331	42385799	GreaterPrairie	9	11399366	18375785	13788469	6976420	1	INV_TRANS	9
5	43523345	49381049	GreaterPrairie	9	20070108	22783960	5857705	2713853	-1	TRANS	9
5	50542243	52893281	GreaterPrairie	9	19329560	20048189	2351039	718630	1	INV_TRANS	9
5	53158637	54600843	GreaterPrairie	9	18910331	19226957	1442207	316627	-1	TRANS	9
5	54628796	56157116	GreaterPrairie	9	18628500	18898819	1528321	270320	1	INV_TRANS	9
6	1911397	3902691	GreaterPrairie	5	282852	856835	1991295	573984	1	Normal	5
6	4142649	9860393	GreaterPrairie	5	927844	2966141	5717745	2038298	-1	INV	5
6	9991676	23401136	GreaterPrairie	5	3003088	9891075	13409461	6887988	1	Normal	5
6	23458899	60830574	GreaterPrairie	5	9857540	29695787	37371676	19838248	1	Normal	5
6	60859169	62013976	GreaterPrairie	5	57400064	57823941	1154808	423878	1	TRANS	5
6	62042518	71499009	GreaterPrairie	5	29980178	34824997	9456492	4844820	-1	INV	5
6	72371382	72745336	GreaterPrairie	5	36365024	36489824	373955	124801	1	TRANS	5
6	72863828	75602135	GreaterPrairie	5	34948077	36290794	2738308	1342718	-1	INV	5
6	75869285	85343386	GreaterPrairie	5	36708089	41890203	9474102	5182115	1	Normal	5
6	85637338	87785602	GreaterPrairie	5	54864116	56084377	2148265	1220262	1	TRANS	5
6	87938929	94403466	GreaterPrairie	5	51597744	54701482	6464538	3103739	1	TRANS	5
6	95229483	95449351	GreaterPrairie	5	56333993	56436988	219869	102996	-1	INV_TRANS	5
6	95638883	111254716	GreaterPrairie	5	43072043	51200581	15615834	8128539	-1	INV	5
6	111313509	111635491	GreaterPrairie	5	57258443	57363242	321983	104800	1	TRANS	5
6	111858639	113924229	GreaterPrairie	5	42283256	43044016	2065591	760761	-1	INV_TRANS	5
6	114166883	116279514	GreaterPrairie	5	51281187	51492930	2112632	211744	-1	INV	5
6	116826520	118928984	GreaterPrairie	5	56757241	57074541	2102465	317301	-1	INV	5
6	119398211	119941730	GreaterPrairie	5	41968696	42060920	543520	92225	1	TRANS	5
6	120415291	120969371	GreaterPrairie	5	57115859	57210181	554081	94323	1	Normal	5
7	52128478	54161232	GreaterPrairie	6	43395009	44301258	2032755	906250	-1	TRANS	6
7	54585770	56337752	GreaterPrairie	6	44322766	45185551	1751983	862786	-1	TRANS	6
7	56399817	59446311	GreaterPrairie	6	45308391	46715103	3046495	1406713	1	INV_TRANS	6
7	60232787	60602757	GreaterPrairie	6	28880640	28956093	369971	75454	-1	TRANS	6
7	60978821	66727375	GreaterPrairie	6	39917691	43183986	5748555	3266296	-1	TRANS	6
7	66858907	85415147	GreaterPrairie	6	31353929	39838486	18556241	8484558	1	INV_TRANS	6
7	85421512	90024994	GreaterPrairie	6	29145203	31330840	4603483	2185638	-1	TRANS	6
7	90580214	95975149	GreaterPrairie	6	46885597	49481865	5394936	2596269	1	INV_TRANS	6
7	96222110	124947992	GreaterPrairie	6	49536219	62693853	28725883	13157635	-1	Normal	6
7	147589	19629277	GreaterPrairie	12	10694068	19181575	19481689	8487508	1	Normal	12
7	19980900	41216195	GreaterPrairie	12	2828649	10576397	21235296	7747749	-1	INV_TRANS	12
7	41677363	43311398	GreaterPrairie	12	790275	1429082	1634036	638808	1	TRANS	12
7	43993813	44248828	GreaterPrairie	12	1446497	1558644	255016	112148	-1	INV_TRANS	12
7	44664759	45754643	GreaterPrairie	12	19320	432436	1089885	413117	-1	INV_TRANS	12
7	46229139	46713593	GreaterPrairie	12	2524874	2658062	484455	133189	-1	INV_TRANS	12
7	46916760	47823433	GreaterPrairie	12	484001	751530	906674	267530	1	TRANS	12
7	49111270	51261325	GreaterPrairie	12	2101656	2389898	2150056	288243	1	TRANS	12
8	728606	2563943	GreaterPrairie	7	8564	600416	1835338	591853	1	INV_TRANS	7
8	4038625	5449794	GreaterPrairie	7	755381	1322151	1411170	566771	-1	TRANS	7
8	6605383	13704765	GreaterPrairie	7	1613428	4702101	7099383	3088674	1	INV_TRANS	7
8	14462412	14564278	GreaterPrairie	7	13029362	13090259	101867	60898	-1	TRANS	7
8	14739718	17778185	GreaterPrairie	7	11277905	12982435	3038468	1704531	1	INV_TRANS	7
8	17826038	20760478	GreaterPrairie	7	9809576	11248676	2934441	1439101	-1	TRANS	7
8	20864448	20984532	GreaterPrairie	7	9580769	9657181	120085	76413	1	INV_TRANS	7
8	21280618	30592135	GreaterPrairie	7	4863501	9534007	9311518	4670507	-1	TRANS	7
8	30628699	45223881	GreaterPrairie	7	13106861	21016909	14595183	7910049	1	INV_TRANS	7
8	45575174	74930268	GreaterPrairie	7	21735390	35718129	29355095	13982740	-1	Normal	7
8	75169607	75338382	GreaterPrairie	7	21615367	21672868	168776	57502	1	INV	7
8	75851074	78125599	GreaterPrairie	7	21028715	21566959	2274526	538245	-1	Normal	7
9	2995	23818990	GreaterPrairie	6	31573	10187540	23815996	10155968	-1	INV	8
9	24231474	47405836	GreaterPrairie	6	10241596	22166820	23174363	11925225	1	Normal	8
9	48634795	52230707	GreaterPrairie	6	26751362	28748124	3595913	1996763	1	Normal	8
9	52421832	53551864	GreaterPrairie	6	26079917	26549920	1130033	470004	-1	INV_TRANS	8
9	53872612	59368221	GreaterPrairie	6	24164843	26001514	5495610	1836672	1	TRANS	8
9	59409953	64267100	GreaterPrairie	6	22578970	24146814	4857148	1567845	-1	INV_TRANS	8
9	67265116	70669491	GreaterPrairie	13	688308	1509134	3404376	820827	-1	TRANS	13
9	70789071	72492226	GreaterPrairie	13	28522	653257	1703156	624736	1	INV_TRANS	13
9	72608830	88486259	GreaterPrairie	13	1514144	9029965	15877430	7515822	1	INV_TRANS	13
9	88574404	106988793	GreaterPrairie	13	9033949	16928346	18414390	7894398	-1	Normal	13
9	107005814	107366049	GreaterPrairie	13	16943922	17081360	360236	137439	1	INV_TRANS	13
10	3276	37622991	GreaterPrairie	10	1847794	19401126	37619716	17553333	-1	Normal	10
10	38092443	38819081	GreaterPrairie	10	1591224	1727241	726639	136018	1	INV	10
10	39222905	43928587	GreaterPrairie	10	132582	1427655	4705683	1295074	1	INV	10
10	46569534	49688392	GreaterPrairie	14	13199134	14049102	3118859	849969	-1	INV_TRANS	14
10	49804935	54014283	GreaterPrairie	14	11666311	12822283	4209349	1155973	-1	INV_TRANS	14
10	54257174	54536675	GreaterPrairie	14	12833328	12921614	279502	88287	-1	INV_TRANS	14
10	54857170	55275606	GreaterPrairie	14	12998419	13155303	418437	156885	1	TRANS	14
10	55889239	61579356	GreaterPrairie	14	8858286	11553501	5690118	2695216	-1	INV_TRANS	14
10	62416480	64917626	GreaterPrairie	14	9970	824649	2501147	814680	-1	INV	14
10	64956615	67320629	GreaterPrairie	14	7312352	8375737	2364015	1063386	1	TRANS	14
10	67338053	67930946	GreaterPrairie	14	14136689	14456674	592894	319986	-1	INV_TRANS	14
10	68003880	68334880	GreaterPrairie	14	14470845	14647453	331001	176609	1	TRANS	14
10	68357391	69036680	GreaterPrairie	14	8379331	8727666	679290	348336	1	TRANS	14
10	69038428	85119281	GreaterPrairie	14	865811	7286451	16080854	6420641	1	Normal	14
11	10325	33427229	GreaterPrairie	11	9170	16628925	33416905	16619756	1	Normal	11
11	34053772	34317893	GreaterPrairie	11	18610824	18730794	264122	119971	-1	INV_TRANS	11
11	34792616	35083216	GreaterPrairie	11	18430622	18539780	290601	109159	1	TRANS	11
11	35092358	35456287	GreaterPrairie	11	18262765	18403173	363930	140409	-1	INV_TRANS	11
11	35729492	35932271	GreaterPrairie	11	16974883	17050905	202780	76023	1	TRANS	11
11	36215114	37007458	GreaterPrairie	11	16728097	16881719	792345	153623	-1	INV	11
11	37261856	37387850	GreaterPrairie	11	17653622	17713903	125995	60282	1	TRANS	11
11	37599253	38187072	GreaterPrairie	11	17488748	17637845	587820	149098	1	TRANS	11
11	38336148	39102626	GreaterPrairie	11	17078060	17316669	766479	238610	-1	INV	11
11	40123455	40722073	GreaterPrairie	11	17749846	17909316	598619	159471	-1	INV	11
11	41485748	42609469	GreaterPrairie	11	18017338	18242313	1123722	224976	1	Normal	11
12	444459	2159560	GreaterPrairie	15	10706402	11029884	1715102	323483	1	TRANS	15
12	3407393	3841485	GreaterPrairie	15	9817313	9918852	434093	101540	1	TRANS	15
12	4455784	5700353	GreaterPrairie	15	9981218	10430532	1244570	449315	-1	INV_TRANS	15
12	5974214	9046541	GreaterPrairie	15	11068123	12450867	3072328	1382745	-1	INV_TRANS	15
12	9138808	14043871	GreaterPrairie	15	7764106	9790430	4905064	2026325	-1	INV_TRANS	15
12	14193727	33075051	GreaterPrairie	15	21851	7733328	18881325	7711478	1	Normal	15
13	146089	19448478	GreaterPrairie	17	1723345	9978044	19302390	8254700	-1	Normal	17
13	20323787	20737621	GreaterPrairie	17	1057661	1172257	413835	114597	-1	Normal	17
13	21882238	23350548	GreaterPrairie	17	70244	512038	1468311	441795	-1	Normal	17
13	23501148	24545359	GreaterPrairie	17	666749	981548	1044212	314800	-1	TRANS	17
13	24891125	25509001	GreaterPrairie	17	1308945	1495529	617877	186585	-1	TRANS	17
13	25753200	25918594	GreaterPrairie	17	2490	59461	165395	56972	1	INV	17
14	43529	15480797	GreaterPrairie	18	4524322	10444792	15437269	5920471	1	Normal	18
14	15574155	24193088	GreaterPrairie	18	1449880	4509770	8618934	3059891	-1	INV_TRANS	18
14	24324002	24488431	GreaterPrairie	18	1367904	1441617	164430	73714	1	TRANS	18
14	24662127	27053111	GreaterPrairie	18	24873	1243228	2390985	1218356	-1	INV_TRANS	18
15	43090	11675338	GreaterPrairie	19	5029010	9513539	11632249	4484530	1	Normal	19
15	11869793	12327988	GreaterPrairie	19	9556965	9650633	458196	93669	-1	INV	19
15	13076747	13279305	GreaterPrairie	19	4695292	4795866	202559	100575	-1	INV_TRANS	19
15	13336167	21191074	GreaterPrairie	19	809525	4618988	7854908	3809464	1	TRANS	19
15	22224229	22710941	GreaterPrairie	19	206491	328061	486713	121571	-1	INV_TRANS	19
15	23242003	24573055	GreaterPrairie	19	422918	741423	1331053	318506	1	TRANS	19
15	24885705	25560375	GreaterPrairie	19	86605	177661	674671	91057	1	TRANS	19
16	6599522	6794440	GreaterPrairie	20	12344276	12398038	194919	53763	1	INV_TRANS	20
16	6922799	7101734	GreaterPrairie	20	12184143	12277712	178936	93570	-1	TRANS	20
16	7264042	8784694	GreaterPrairie	20	12402672	12884915	1520653	482244	1	INV_TRANS	20
16	9006522	10862801	GreaterPrairie	20	9384236	9910866	1856280	526631	-1	TRANS	20
16	11221298	11372339	GreaterPrairie	20	9236963	9306375	151042	69413	1	INV_TRANS	20
16	11467399	12515995	GreaterPrairie	20	8748517	9186305	1048597	437789	-1	TRANS	20
16	12614535	13991882	GreaterPrairie	20	12924146	13442712	1377348	518567	1	INV	20
16	14083417	15739753	GreaterPrairie	20	9953550	10778282	1656337	824733	-1	TRANS	20
16	15836186	18227117	GreaterPrairie	20	10805124	12124375	2390932	1319252	1	INV	20
16	18296522	21819194	GreaterPrairie	20	7202306	8728937	3522673	1526632	-1	Normal	20
16	21938204	28208153	GreaterPrairie	20	5760	3064354	6269950	3058595	1	INV_TRANS	20
16	28499183	38826733	GreaterPrairie	20	3140960	7054536	10327551	3913577	-1	Normal	20
16	38862638	39050664	GreaterPrairie	20	7099745	7177425	188027	77681	1	INV_TRANS	20
17	143236	12009308	GreaterPrairie	21	2486267	6394065	11866073	3907799	-1	Normal	21
17	12030903	15923542	GreaterPrairie	21	895343	2263818	3892640	1368476	1	INV	21
17	16328930	16771212	GreaterPrairie	21	6480019	6554199	442283	74181	-1	TRANS	21
17	17299668	18284039	GreaterPrairie	21	2284508	2475093	984372	190586	1	INV_TRANS	21
17	18661079	23661211	GreaterPrairie	21	63171	861440	5000133	798270	-1	Normal	21
18	3395433	3861512	GreaterPrairie	22	2683933	2763383	466080	79451	1	TRANS	22
18	5480219	6264701	GreaterPrairie	22	29274	366915	784483	337642	1	Normal	22
18	6621280	8238201	GreaterPrairie	22	2987618	3754447	1616922	766830	-1	INV_TRANS	22
18	8483869	16498967	GreaterPrairie	22	403941	2678120	8015099	2274180	1	Normal	22
19	400	5370000	GreaterPrairie	23	227213	1713924	5369601	1486712	-1	TRANS	23
19	5388256	7574261	GreaterPrairie	23	2376245	3016698	2186006	640454	-1	TRANS	23
19	7696551	9530292	GreaterPrairie	23	1755478	2084059	1833742	328582	-1	TRANS	23
19	9699984	10186128	GreaterPrairie	23	40458	215091	486145	174634	1	INV_TRANS	23
19	10244981	10487805	GreaterPrairie	23	3021889	3072501	242825	50613	1	INV_TRANS	23
19	10508620	11353191	GreaterPrairie	23	2102865	2372859	844572	269995	1	INV_TRANS	23
19	11410843	19780822	GreaterPrairie	23	3107143	5547865	8369980	2440723	-1	Normal	23
20	2523924	13512895	GreaterPrairie	24	302152	4270875	10988972	3968724	1	Normal	24
20	13899894	15102976	GreaterPrairie	24	5717893	6144499	1203083	426607	-1	INV_TRANS	24
20	15531421	18409168	GreaterPrairie	24	4356585	5384566	2877748	1027982	1	Normal	24
20	18432957	18570463	GreaterPrairie	24	4288441	4355453	137507	67013	-1	INV_TRANS	24
20	18797006	19096267	GreaterPrairie	24	5477677	5586439	299262	108763	1	Normal	24
21	8595632	14573149	GreaterPrairie	25	356072	1158035	5977518	801964	-1	Normal	25
21	15780036	16062379	GreaterPrairie	25	1597390	1655231	282344	57842	-1	TRANS	25
21	16664770	17092967	GreaterPrairie	25	1245514	1371236	428198	125723	1	INV_TRANS	25
22	2811506	3499802	GreaterPrairie	26	616971	801703	688297	184733	-1	INV	26
22	3924664	4344027	GreaterPrairie	26	328428	452608	419364	124181	1	TRANS	26
22	4383426	4568683	GreaterPrairie	26	985675	1046138	185258	60464	-1	INV	26
22	5063001	5249170	GreaterPrairie	26	239415	295917	186170	56503	1	TRANS	26
22	5411114	6588152	GreaterPrairie	26	1127078	1498438	1177039	371361	1	Normal	26
22	6926093	7153086	GreaterPrairie	26	88828	195303	226994	106476	-1	INV_TRANS	26
22	7539076	10788416	GreaterPrairie	26	3875826	4989962	3249341	1114137	1	TRANS	26
22	10827074	18390640	GreaterPrairie	26	1500674	3794951	7563567	2294278	1	Normal	26
23	755531	2952898	GreaterPrairie	27	445067	818802	2197368	373736	-1	INV	27
23	4354540	9504003	GreaterPrairie	27	1067486	2433637	5149464	1366152	1	Normal	27
23	9624554	15956983	GreaterPrairie	27	2596441	4307923	6332430	1711483	1	Normal	27
23	16084453	16427703	GreaterPrairie	27	2451377	2568699	343251	117323	-1	INV_TRANS	27
24	45512	6308212	GreaterPrairie	28	506387	2131782	6262701	1625396	1	Normal	28
24	6802135	7036400	GreaterPrairie	28	3254033	3322803	234266	68771	-1	INV_TRANS	28
24	7060395	8176453	GreaterPrairie	28	23706	488206	1116059	464501	-1	INV_TRANS	28
24	8267433	8677169	GreaterPrairie	28	2181767	2277777	409737	96011	1	Normal	28
24	9013735	12201431	GreaterPrairie	28	2399809	3215501	3187697	815693	-1	INV	28
24	13165885	13713285	GreaterPrairie	28	3427086	3532190	547401	105105	1	Normal	28
24	13917005	14506079	GreaterPrairie	28	3971916	4232889	589075	260974	-1	INV	28
24	14584015	15599322	GreaterPrairie	28	3534160	3690563	1015308	156404	-1	INV_TRANS	28
24	15707611	16612854	GreaterPrairie	28	3723934	3944096	905244	220163	1	TRANS	28
25	322845	2547505	GreaterPrairie	Z	8228853	8892952	2224661	664100	-1	INV_TRANS	Z
25	3489099	4245262	GreaterPrairie	Z	7789498	8117990	756164	328493	1	TRANS	Z
25	4489616	15221263	GreaterPrairie	Z	1110970	7672575	10731648	6561606	-1	INV	Z
25	19144051	19759915	GreaterPrairie	Z	12252	272128	615865	259877	1	TRANS	Z
25	19865819	20530659	GreaterPrairie	Z	353424	539297	664841	185874	-1	INV_TRANS	Z
25	21024357	21994479	GreaterPrairie	Z	630617	926719	970123	296103	1	TRANS	Z
25	22008701	49826764	GreaterPrairie	Z	8968109	24719571	27818064	15751463	1	Normal	Z
25	49976326	50184916	GreaterPrairie	Z	69998170	70103798	208591	105629	-1	INV_TRANS	Z
25	50285871	60534213	GreaterPrairie	Z	54352334	60603753	10248343	6251420	-1	INV_TRANS	Z
25	60756982	61270163	GreaterPrairie	Z	50021073	50326793	513182	305721	1	TRANS	Z
25	61422071	71245120	GreaterPrairie	Z	42649168	48208682	9823050	5559515	1	TRANS	Z
25	72049842	72209535	GreaterPrairie	Z	61688860	61754852	159694	65993	1	TRANS	Z
25	72566848	74874883	GreaterPrairie	Z	68570582	69881312	2308036	1310731	-1	INV_TRANS	Z
25	76367012	77303283	GreaterPrairie	Z	63071000	63662919	936272	591920	1	TRANS	Z
25	77558674	79165660	GreaterPrairie	Z	61867046	63022864	1606987	1155819	-1	INV_TRANS	Z
25	79508676	80366725	GreaterPrairie	Z	50391934	50937006	858050	545073	-1	INV_TRANS	Z
25	80585593	83150838	GreaterPrairie	Z	48279489	49816392	2565246	1536904	1	TRANS	Z
25	83627735	84401172	GreaterPrairie	Z	40998595	41478424	773438	479830	1	TRANS	Z
25	85693759	98375099	GreaterPrairie	Z	33087442	40740406	12681341	7652965	-1	INV_TRANS	Z
25	98622940	111193376	GreaterPrairie	Z	24807309	32898490	12570437	8091182	1	Normal	Z
25	113609467	114617944	GreaterPrairie	Z	65223811	65729576	1008478	505766	-1	INV_TRANS	Z
25	117487253	120145527	GreaterPrairie	Z	66595458	68051993	2658275	1456536	1	TRANS	Z
25	120694626	120801474	GreaterPrairie	Z	61311401	61375111	106849	63711	-1	INV_TRANS	Z
25	122939113	123904124	GreaterPrairie	Z	71131211	71528550	965012	397340	1	TRANS	Z
25	124718426	126065107	GreaterPrairie	Z	41752768	42326193	1346682	573426	-1	INV	Z
25	126495436	127661488	GreaterPrairie	Z	53663652	54329504	1166053	665853	1	TRANS	Z
25	128079042	132238596	GreaterPrairie	Z	51174411	53643953	4159555	2469543	-1	INV	Z
25	132642106	133191442	GreaterPrairie	Z	70783450	70994168	549337	210719	-1	INV	Z
1	118186	5499244	Chicken	1	197033604	197533505	5381059	499902	-1	Normal	1
1	8163893	11702222	Chicken	1	195718500	196905660	3538330	1187161	1	INV	1
1	12045181	17705076	Chicken	1	191827321	195501518	5659896	3674198	-1	Normal	1
1	17767494	20182806	Chicken	1	190272935	191762025	2415313	1489091	1	INV	1
1	20295257	101946035	Chicken	1	142339123	190253960	81650779	47914838	-1	Normal	1
1	103210336	106360311	Chicken	1	139350650	141283539	3149976	1932890	1	INV	1
1	106451026	130811961	Chicken	1	124938722	139303464	24360936	14364743	-1	Normal	1
1	130903451	131527879	Chicken	1	124469868	124872816	624429	402949	1	INV	1
1	131632179	142900279	Chicken	1	117511448	124346683	11268101	6835236	-1	Normal	1
1	142985159	145730849	Chicken	1	115698171	117384004	2745691	1685834	1	INV	1
1	146509846	203900654	Chicken	1	79419410	115017111	57390809	35597702	-1	Normal	1
1	204553222	206409560	Chicken	1	77348658	78029382	1856339	680725	1	INV	1
1	206686692	207132097	Chicken	1	78177232	78415823	445406	238592	-1	TRANS	1
1	207495320	208935181	Chicken	1	78558528	79129745	1439862	571218	1	INV_TRANS	1
1	210323397	212128922	Chicken	1	75117092	75888923	1805526	771832	-1	Normal	1
1	212983221	215292324	Chicken	1	73350006	74780230	2309104	1430225	1	INV	1
1	215511004	325887865	Chicken	1	9650533	73325048	110376862	63674516	-1	Normal	1
1	326105391	326831019	Chicken	1	8975757	9517462	725629	541706	1	INV	1
1	326994482	344475953	Chicken	1	339353	8986003	17481472	8646651	-1	Normal	1
2	465838	840410	Chicken	2	149325749	149482815	374573	157067	1	INV	2
2	2088085	2278090	Chicken	2	130737712	130875571	190006	137860	1	INV_TRANS	2
2	4004868	33427569	Chicken	2	131533293	148894740	29422702	17361448	-1	Normal	2
2	34024418	100541986	Chicken	2	90396551	130494183	66517569	40097633	-1	Normal	2
2	100901655	103156614	Chicken	2	56053220	57652447	2254960	1599228	-1	TRANS	2
2	103195671	104074923	Chicken	2	89782960	90247865	879253	464906	1	INV	2
2	104135511	142047865	Chicken	2	57778922	79802819	37912355	22023898	1	INV	2
2	143790991	152158707	Chicken	2	85698029	89734736	8367717	4036708	1	INV_TRANS	2
2	152296522	152577476	Chicken	2	55941442	56044264	280955	102823	-1	Normal	2
2	153026154	153701035	Chicken	2	55539451	55782394	674882	242944	1	INV	2
2	154084066	164135850	Chicken	2	79944366	85674891	10051785	5730526	-1	TRANS	2
2	164591799	174486403	Chicken	2	49138833	55152498	9894605	6013666	-1	Normal	2
2	174761915	179485829	Chicken	2	45981381	49016183	4723915	3034803	1	INV	2
2	179486577	253818376	Chicken	2	4364597	45978532	74331800	41613936	-1	Normal	2
2	254412582	260979987	Chicken	2	1070681	4109701	6567406	3039021	1	INV	2
2	261207591	265697400	Chicken	2	157544	983759	4489810	826216	-1	Normal	2
3	1030506	1137214	Chicken	3	16531445	16600546	106709	69102	-1	INV_TRANS	3
3	2447156	2789729	Chicken	3	3157061	3265091	342574	108031	1	Normal	3
3	2815501	2966651	Chicken	3	16097020	16150192	151151	53173	1	TRANS	3
3	2983994	3545391	Chicken	3	4243978	4430271	561398	186294	1	TRANS	3
3	3653010	3784502	Chicken	3	15991234	16071856	131493	80623	1	TRANS	3
3	3810781	4148835	Chicken	3	16649803	16843978	338055	194176	1	TRANS	3
3	4289660	6000292	Chicken	3	3358144	3933382	1710633	575239	1	Normal	3
3	6014016	6157608	Chicken	3	4104858	4183703	143593	78846	-1	INV	3
3	6745647	7197922	Chicken	3	15463429	15644191	452276	180763	1	TRANS	3
3	7741379	8036356	Chicken	3	16861662	17034631	294978	172970	1	TRANS	3
3	8073298	12719908	Chicken	3	12726669	15416147	4646611	2689479	-1	INV	3
3	12779358	14679326	Chicken	3	4527450	5647978	1899969	1120529	1	TRANS	3
3	15126591	19676195	Chicken	3	9780501	12169165	4549605	2388665	1	TRANS	3
3	20368148	25447601	Chicken	3	95096	2408652	5079454	2313557	-1	INV_TRANS	3
3	25747494	26082509	Chicken	3	2533361	2644084	335016	110724	1	TRANS	3
3	26140124	26803401	Chicken	3	9384106	9590368	663278	206263	1	TRANS	3
3	28135927	30662785	Chicken	3	6518620	7788076	2526859	1269457	-1	INV_TRANS	3
3	31299265	32141969	Chicken	3	2697071	3048776	842705	351706	-1	INV_TRANS	3
3	32738199	51653066	Chicken	3	17130113	27263663	18914868	10133551	-1	INV	3
3	51896123	52403441	Chicken	3	12434574	12684958	507319	250385	-1	INV_TRANS	3
3	52682639	54625189	Chicken	3	8305626	9248148	1942551	942523	1	TRANS	3
3	54650553	88290744	Chicken	3	27328165	45925395	33640192	18597231	1	Normal	3
3	88602740	99341640	Chicken	3	46008250	52221338	10738901	6213089	-1	INV	3
3	99446144	117387856	Chicken	3	52355656	63048586	17941713	10692931	1	Normal	3
3	117486771	118279654	Chicken	3	63114009	63574677	792884	460669	-1	INV	3
3	118352363	189229772	Chicken	3	63642859	104255994	70877410	40613136	1	Normal	3
3	189489287	200944322	Chicken	3	105363340	110704892	11455036	5341553	-1	INV	3
3	201077557	202439150	Chicken	3	105015173	105335940	1361594	320768	1	TRANS	3
3	202926722	205539984	Chicken	3	104341352	104932908	2613263	591557	-1	INV_TRANS	3
4	1681970	1970626	Chicken	4	49175981	49262965	288657	86985	-1	INV_TRANS	4
4	3021637	6759900	Chicken	4	47270294	49136441	3738264	1866148	1	TRANS	4
4	6842182	8509661	Chicken	4	50994438	51785053	1667480	790616	1	TRANS	4
4	8650265	8897698	Chicken	4	34083388	34213909	247434	130522	-1	INV_TRANS	4
4	9131409	9361189	Chicken	4	34642967	34741519	229781	98553	1	TRANS	4
4	9767941	9899393	Chicken	4	44783980	44834833	131453	50854	1	TRANS	4
4	10364170	10494644	Chicken	4	44681058	44744990	130475	63933	-1	INV_TRANS	4
4	10828806	13265238	Chicken	4	49659903	50883357	2436433	1223455	-1	INV_TRANS	4
4	13513673	13876241	Chicken	4	34766533	34982756	362569	216224	-1	INV_TRANS	4
4	14064905	15540081	Chicken	4	44894179	45476367	1475177	582189	1	TRANS	4
4	16128405	16486823	Chicken	4	46301088	46416009	358419	114922	-1	INV_TRANS	4
4	16679447	17376989	Chicken	4	46448104	46831104	697543	383001	1	TRANS	4
4	17396406	17573872	Chicken	4	46893513	46976346	177467	82834	-1	INV_TRANS	4
4	17920890	19000982	Chicken	4	45730533	46198977	1080093	468445	-1	INV_TRANS	4
4	19575961	23163566	Chicken	4	35028149	37174821	3587606	2146673	1	TRANS	4
4	23484921	28479912	Chicken	4	58246236	61033628	4994992	2787393	1	TRANS	4
4	28695497	32037902	Chicken	4	37267774	39200849	3342406	1933076	-1	INV_TRANS	4
4	32125684	42857067	Chicken	4	51831929	58162510	10731384	6330582	-1	INV_TRANS	4
4	42962963	43721441	Chicken	4	34250412	34595828	758479	345417	1	TRANS	4
4	43915400	58051800	Chicken	4	25576292	33976227	14136401	8399936	1	Normal	4
4	58183349	68073133	Chicken	4	19832291	25202314	9889785	5370024	1	TRANS	4
4	68132827	68634380	Chicken	4	25327492	25532576	501554	205085	-1	INV_TRANS	4
4	69007795	73805892	Chicken	4	42361363	44658911	4798098	2297549	1	TRANS	4
4	73958478	79185777	Chicken	4	39260479	42196534	5227300	2936056	-1	INV	4
4	79240169	137389034	Chicken	4	61038033	90686239	58148866	29648207	1	Normal	4
4	139288732	140472599	Chicken	4	90831289	91039792	1183868	208504	-1	INV	4
5	56323363	57427905	Chicken	4	11014986	11287668	1104543	272683	-1	INV_TRANS	4a
5	57489336	57766201	Chicken	4	2111265	2189361	276866	78097	1	TRANS	4a
5	59650956	61120161	Chicken	4	1530941	1749241	1469206	218301	-1	INV	4a
5	61231618	62082411	Chicken	4	11292946	11484783	850794	191838	1	TRANS	4a
5	62863259	63575411	Chicken	4	10634260	10939407	712153	305148	1	TRANS	4a
5	63639186	64451914	Chicken	4	1894204	2104730	812729	210527	1	Normal	4a
5	64583244	75244245	Chicken	4	5143709	9464971	10661002	4321263	1	Normal	4a
5	75616223	79684226	Chicken	4	88277	1509420	4068004	1421144	-1	INV_TRANS	4a
5	79963900	92682007	Chicken	4	11532562	18688956	12718108	7156395	1	Normal	4a
5	93884094	95570646	Chicken	4	9636608	10596488	1686553	959881	1	TRANS	4a
5	95651022	102860629	Chicken	4	2191608	5110791	7209608	2919184	-1	INV_TRANS	4a
5	1930	28529190	Chicken	9	12612682	24107887	28527261	11495206	1	Normal	9
5	28597317	42288335	Chicken	9	5571761	12599555	13691019	7027795	-1	INV_TRANS	9
5	43527070	48834365	Chicken	9	546543	3336543	5307296	2790001	-1	INV_TRANS	9
5	48864752	49425741	Chicken	9	3630352	3826302	560990	195951	1	TRANS	9
5	50635259	52859955	Chicken	9	3856864	4542490	2224697	685627	-1	INV_TRANS	9
5	53158637	54600843	Chicken	9	4670394	4990620	1442207	320227	1	TRANS	9
5	54750218	56219958	Chicken	9	4998125	5239000	1469741	240876	-1	INV_TRANS	9
6	1907323	3829435	Chicken	5	58907872	59500711	1922113	592840	-1	Normal	5
6	4271522	9970693	Chicken	5	56727566	58859878	5699172	2132313	1	INV	5
6	10069275	60825957	Chicken	5	29601718	56635460	50756683	27033743	-1	Normal	5
6	60859169	62013976	Chicken	5	825968	1249327	1154808	423360	1	INV_TRANS	5
6	62018933	71743153	Chicken	5	24453380	29428681	9724221	4975302	1	INV	5
6	72267418	75728250	Chicken	5	22734193	24414310	3460833	1680118	1	INV	5
6	75887098	85343386	Chicken	5	17370618	22559010	9456289	5188393	-1	Normal	5
6	85361970	87784307	Chicken	5	1879876	3281816	2422338	1401941	1	INV_TRANS	5
6	87938929	88413362	Chicken	5	1354418	1546802	474434	192385	-1	TRANS	5
6	88881682	93184559	Chicken	5	3567253	5895590	4302878	2328338	1	INV_TRANS	5
6	93256542	94252404	Chicken	5	6850777	7298126	995863	447350	-1	TRANS	5
6	95152645	111274455	Chicken	5	7589240	16049880	16121811	8460641	1	INV	5
6	111313553	111685797	Chicken	5	681715	797888	372245	116174	1	INV_TRANS	5
6	111825290	113934684	Chicken	5	16055696	16837223	2109395	781528	1	INV_TRANS	5
6	114130096	116279525	Chicken	5	1643499	1866407	2149430	222909	1	INV	5
6	116426446	116563947	Chicken	5	16945586	16997138	137502	51553	-1	TRANS	5
6	116826519	118928984	Chicken	5	138286	489237	2102466	350952	-1	Normal	5
6	119398211	119941730	Chicken	5	17193897	17289642	543520	95746	-1	TRANS	5
6	120415291	120969371	Chicken	5	526443	633464	554081	107022	1	INV_TRANS	5
7	52128478	54161232	Chicken	6	16480679	17387737	2032755	907059	-1	TRANS	6
7	54585770	56337752	Chicken	6	17423628	18298431	1751983	874804	-1	TRANS	6
7	56399817	59499482	Chicken	6	18466836	19909053	3099666	1442218	1	INV_TRANS	6
7	60232776	60602757	Chicken	6	9983688	10058734	369982	75047	-1	TRANS	6
7	60767751	66727375	Chicken	6	12970494	16354192	5959625	3383699	-1	TRANS	6
7	66930693	75586427	Chicken	6	1359406	5855984	8655735	4496579	-1	TRANS	6
7	75865221	80517618	Chicken	6	7314195	9826357	4652398	2512163	-1	TRANS	6
7	80541540	82157003	Chicken	6	11140073	11751781	1615464	611709	1	INV_TRANS	6
7	82488386	85300792	Chicken	6	11951043	12648881	2812407	697839	-1	TRANS	6
7	85421507	88111813	Chicken	6	5905017	7303642	2690307	1398626	1	INV_TRANS	6
7	88229243	90178238	Chicken	6	10175942	10991235	1948996	815294	-1	TRANS	6
7	90580214	95975149	Chicken	6	20052059	22930557	5394936	2878499	1	INV_TRANS	6
7	96321069	124947997	Chicken	6	22985998	36223790	28626929	13237793	-1	Normal	6
7	147589	19629277	Chicken	12	11688914	20264151	19481689	8575238	1	INV	12
7	19843565	29410134	Chicken	12	6885000	11627355	9566570	4742356	-1	Normal	12
7	34014607	41347617	Chicken	12	3731465	6869707	7333011	3138243	-1	Normal	12
7	41677363	44027045	Chicken	12	636003	1815052	2349683	1179050	-1	Normal	12
7	44631019	45772181	Chicken	12	2165183	2691709	1141163	526527	1	INV_TRANS	12
7	46229139	46713593	Chicken	12	3422430	3553975	484455	131546	-1	TRANS	12
7	46916750	47778422	Chicken	12	1868019	2134020	861673	266002	-1	TRANS	12
7	49111270	51221663	Chicken	12	2772751	3070450	2110394	297700	-1	TRANS	12
7	51469211	51748100	Chicken	12	3162407	3228900	278890	66494	-1	TRANS	12
8	1222369	2526800	Chicken	7	6710776	7184373	1304432	473598	-1	TRANS	7
8	3783277	5562182	Chicken	7	5832396	6577538	1778906	745143	1	INV_TRANS	7
8	6605384	13771949	Chicken	7	2480515	5631839	7166566	3151325	-1	TRANS	7
8	14468487	14555361	Chicken	7	13805099	13860099	86875	55001	-1	TRANS	7
8	14739718	17778185	Chicken	7	12036613	13750957	3038468	1714345	1	INV_TRANS	7
8	17826038	20760478	Chicken	7	10550501	12007536	2934441	1457036	-1	TRANS	7
8	20864448	20951152	Chicken	7	10321790	10381929	86705	60140	1	INV_TRANS	7
8	21201859	25539783	Chicken	7	7878329	10311533	4337925	2433205	-1	TRANS	7
8	25687737	30592121	Chicken	7	89989	2354864	4904385	2264876	1	INV_TRANS	7
8	30628699	45223882	Chicken	7	13878370	21919554	14595184	8041185	1	INV_TRANS	7
8	45281807	74853209	Chicken	7	22640107	36708533	29571403	14068427	-1	Normal	7
8	75169607	75311426	Chicken	7	22492948	22546041	141820	53094	1	INV	7
8	75761805	78125599	Chicken	7	21936537	22478157	2363795	541621	-1	Normal	7
9	2995	24124128	Chicken	8	19958217	30176808	24121134	10218592	1	Normal	8
9	24231235	39649051	Chicken	8	11469876	19906268	15417817	8436393	-1	INV_TRANS	8
9	39741195	47405872	Chicken	8	455042	4004040	7664678	3548999	1	TRANS	8
9	48634817	52230707	Chicken	8	8605257	11277040	3595891	2671784	1	TRANS	8
9	52421832	53579901	Chicken	8	7873441	8349410	1158070	475970	-1	INV_TRANS	8
9	53872615	59368887	Chicken	8	5957419	7800808	5496273	1843390	1	TRANS	8
9	59433595	66539790	Chicken	8	4156158	5929146	7106196	1772989	-1	INV_TRANS	8
9	67265116	69573783	Chicken	13	2596635	3139092	2308668	542458	-1	TRANS	13
9	70021877	70714965	Chicken	13	1334450	1622394	693089	287945	1	INV_TRANS	13
9	70789071	72315240	Chicken	13	1697068	2303381	1526170	606314	-1	TRANS	13
9	72715638	88486259	Chicken	13	3173586	10774197	15770622	7600612	1	INV_TRANS	13
9	88574404	106988793	Chicken	13	10778125	18776452	18414390	7998328	-1	Normal	13
9	107005814	107355228	Chicken	13	18791295	18918877	349415	127583	1	INV_TRANS	13
10	3276	37622991	Chicken	10	3111086	20792793	37619716	17681708	-1	Normal	10
10	38092443	38819107	Chicken	10	2837756	2976781	726665	139026	1	INV	10
10	39222905	43932780	Chicken	10	1338356	2672702	4709876	1334347	1	INV	10
10	46569534	46679422	Chicken	14	14678403	14732211	109889	53809	-1	INV_TRANS	14
10	46801098	49069206	Chicken	14	14027622	14628446	2268109	600825	1	TRANS	14
10	49162054	49688392	Chicken	14	13839469	13992530	526339	153062	-1	INV_TRANS	14
10	49804935	53983819	Chicken	14	12308112	13452281	4178885	1144170	-1	INV_TRANS	14
10	54257174	54516294	Chicken	14	13468968	13554940	259121	85973	-1	INV_TRANS	14
10	54855502	55274897	Chicken	14	13632583	13795429	419396	162847	1	TRANS	14
10	55889239	61550720	Chicken	14	9443981	12177324	5661482	2733344	-1	INV_TRANS	14
10	62345419	64903548	Chicken	14	465001	1315044	2558130	850044	-1	INV	14
10	64956615	67318099	Chicken	14	7881470	8947470	2361485	1066001	1	TRANS	14
10	67338039	67837992	Chicken	14	14876938	15157812	499954	280875	-1	INV_TRANS	14
10	68003880	68336597	Chicken	14	15202403	15389896	332718	187494	1	TRANS	14
10	68390704	69036740	Chicken	14	8967633	9309069	646037	341437	1	TRANS	14
10	69038428	85119281	Chicken	14	1344364	7854218	16080854	6509855	1	Normal	14
11	10360	32762344	Chicken	11	3245892	19926191	32751985	16680300	-1	Normal	11
11	32870935	33427229	Chicken	11	80501	318019	556295	237519	1	INV_TRANS	11
11	34018855	34323887	Chicken	11	2392158	2529174	305033	137017	-1	Normal	11
11	34795996	35083216	Chicken	11	2214885	2323290	287221	108406	1	INV	11
11	35092358	35439022	Chicken	11	2043558	2183660	346665	140103	-1	Normal	11
11	35497433	35932273	Chicken	11	618788	755879	434841	137092	1	INV_TRANS	11
11	36215078	37007450	Chicken	11	421791	580282	792373	158492	-1	TRANS	11
11	37261856	37387721	Chicken	11	1408049	1473129	125866	65081	1	INV	11
11	37589476	38187076	Chicken	11	1235334	1391208	597601	155875	1	INV	11
11	38336142	39091823	Chicken	11	793342	1038595	755682	245254	-1	Normal	11
11	40123455	40722074	Chicken	11	1511827	1671400	598620	159574	-1	TRANS	11
11	41099106	41255799	Chicken	11	1091303	1144394	156694	53092	1	INV_TRANS	11
11	41485748	42620793	Chicken	11	1783787	2021979	1135046	238193	1	INV_TRANS	11
12	402547	2155161	Chicken	15	11102155	11452772	1752615	350618	1	TRANS	15
12	3407393	3841485	Chicken	15	10208636	10311794	434093	103159	1	TRANS	15
12	4342357	5890645	Chicken	15	10333469	10873816	1548289	540348	-1	INV_TRANS	15
12	5993272	8955786	Chicken	15	11513799	12904548	2962515	1390750	-1	INV_TRANS	15
12	9138825	14038840	Chicken	15	8142775	10183147	4900016	2040373	-1	INV_TRANS	15
12	14193727	33070888	Chicken	15	336503	8109052	18877162	7772550	1	Normal	15
13	243798	19756111	Chicken	17	2261506	10691495	19512314	8429990	-1	Normal	17
13	20302154	20754268	Chicken	17	675300	809475	452115	134176	1	INV_TRANS	17
13	21585631	23319574	Chicken	17	1313003	1819824	1733944	506822	1	INV	17
13	23501148	24691968	Chicken	17	880063	1285372	1190821	405310	1	INV	17
13	24891120	25918594	Chicken	17	1836972	2132625	1027475	295654	-1	TRANS	17
14	43529	653562	Chicken	18	4846493	5060131	610034	213639	1	INV_TRANS	18
14	671442	12867034	Chicken	18	5064620	9973379	12195593	4908760	-1	Normal	18
14	12876904	15480797	Chicken	18	9978184	10924182	2603894	945999	1	INV_TRANS	18
14	15564696	24193157	Chicken	18	1643865	4837129	8628462	3193265	-1	Normal	18
14	24324006	24488425	Chicken	18	1560749	1635292	164420	74544	1	INV	18
14	24747277	27053111	Chicken	18	119634	1365069	2305835	1245436	-1	Normal	18
15	43091	11795754	Chicken	19	5318671	9905550	11752664	4586880	1	Normal	19
15	11860308	12299144	Chicken	19	9942036	10034176	438837	92141	-1	INV	19
15	12502706	13234662	Chicken	19	5005494	5306799	731957	301306	-1	INV_TRANS	19
15	13284054	21175096	Chicken	19	997073	4879431	7891043	3882359	1	TRANS	19
15	22224229	22710941	Chicken	19	412145	535772	486713	123628	-1	INV_TRANS	19
15	23242003	23820835	Chicken	19	630867	825828	578833	194962	1	TRANS	19
15	24885705	25560375	Chicken	19	282342	379985	674671	97644	1	TRANS	19
16	6920007	7116491	Chicken	20	1284782	1388516	196485	103735	1	TRANS	20
16	7264042	8897364	Chicken	20	634523	1158184	1633323	523662	-1	INV	20
16	9006495	11095201	Chicken	20	2097221	2692047	2088707	594827	-1	INV	20
16	11221297	11372396	Chicken	20	1964213	2064663	151100	100451	1	TRANS	20
16	11488952	12515984	Chicken	20	1458852	1899633	1027033	440782	-1	INV_TRANS	20
16	12836630	13993619	Chicken	20	77877	576539	1156990	498663	-1	INV_TRANS	20
16	14023580	15739753	Chicken	20	2739710	3648223	1716174	908514	-1	INV	20
16	15836186	21819194	Chicken	20	3658592	6625952	5983009	2967361	1	Normal	20
16	21938204	28195084	Chicken	20	10841635	13888401	6256881	3046767	-1	INV_TRANS	20
16	28438154	38856126	Chicken	20	6736801	10758333	10417973	4021533	1	Normal	20
17	143236	12009308	Chicken	21	243516	4202812	11866073	3959297	1	Normal	21
17	12117048	15915020	Chicken	21	4440796	5785086	3797973	1344291	-1	INV	21
17	16289497	16956662	Chicken	21	68944	171158	667166	102215	1	TRANS	21
17	17299668	18284039	Chicken	21	4215397	4416074	984372	200678	-1	INV_TRANS	21
17	18661045	23661212	Chicken	21	5869506	6749873	5000168	880368	1	Normal	21
18	1568856	1776204	Chicken	22	3731327	3784918	207349	53592	1	TRANS	22
18	2314069	2663195	Chicken	22	5218607	5274033	349127	55427	1	TRANS	22
18	3395436	4986830	Chicken	22	3808045	4149513	1591395	341469	1	TRANS	22
18	5480224	6291406	Chicken	22	192747	569153	811183	376407	1	Normal	22
18	6509476	8238201	Chicken	22	4193367	4995424	1728726	802058	-1	INV_TRANS	22
18	8483869	16491054	Chicken	22	602796	3060950	8007186	2458155	1	Normal	22
19	288669	5285992	Chicken	23	383929	1827626	4997324	1443698	-1	TRANS	23
19	5388256	7574261	Chicken	23	2702963	3344648	2186006	641686	-1	TRANS	23
19	7696551	9634324	Chicken	23	1892525	2403856	1937774	511332	-1	TRANS	23
19	9650261	10172133	Chicken	23	135065	340096	521873	205032	1	INV_TRANS	23
19	10244953	10488291	Chicken	23	3349582	3403038	243339	53457	1	INV_TRANS	23
19	10508620	11353191	Chicken	23	2423247	2699050	844572	275804	1	INV_TRANS	23
19	11410879	19780822	Chicken	23	3439771	5908943	8369944	2469173	-1	Normal	23
20	2263168	13512895	Chicken	24	306952	4356105	11249728	4049154	1	Normal	24
20	13909326	15183420	Chicken	24	5798715	6269738	1274095	471024	-1	INV_TRANS	24
20	15531421	18135641	Chicken	24	4442265	5409771	2604221	967507	1	Normal	24
20	18432957	18570463	Chicken	24	4373346	4441128	137507	67783	-1	INV_TRANS	24
20	18797006	19096267	Chicken	24	5577178	5690193	299262	113016	1	Normal	24
21	8587687	11396262	Chicken	25	252658	1880853	2808576	1628196	1	Normal	25
21	12972868	14576355	Chicken	25	2388414	2775110	1603488	386697	-1	INV	25
21	15249563	15568596	Chicken	25	3310310	3426037	319034	115728	1	TRANS	25
21	15759079	16294906	Chicken	25	2853478	3039298	535828	185821	1	Normal	25
21	16627530	17092951	Chicken	25	3506196	3661055	465422	154860	1	Normal	25
22	2811506	3499802	Chicken	26	655104	846130	688297	191027	-1	INV	26
22	3924664	4344027	Chicken	26	349939	479309	419364	129371	1	TRANS	26
22	4383426	4568683	Chicken	26	1033674	1096279	185258	62606	-1	INV	26
22	5063001	5249170	Chicken	26	261141	316775	186170	55635	1	TRANS	26
22	5417579	6588152	Chicken	26	1301497	1677289	1170574	375793	1	Normal	26
22	6926092	7392425	Chicken	26	45148	215938	466334	170791	-1	INV_TRANS	26
22	7550402	10788416	Chicken	26	4087894	5248575	3238015	1160682	1	TRANS	26
22	10827074	18390640	Chicken	26	1679659	4002129	7563567	2322471	1	Normal	26
23	200761	3263655	Chicken	27	3466199	4070979	3062895	604781	-1	INV	27
23	3963265	9503982	Chicken	27	4185972	5853033	5540718	1667062	1	Normal	27
23	9624554	15956992	Chicken	27	6015015	8010954	6332439	1995940	1	Normal	27
23	16084453	16374450	Chicken	27	5888891	5987248	289998	98358	-1	INV_TRANS	27
24	45112	6308212	Chicken	28	2736702	4541063	6263101	1804362	-1	Normal	28
24	6516172	7036364	Chicken	28	1307752	1467131	520193	159380	1	INV_TRANS	28
24	7041687	8209001	Chicken	28	4544707	5042290	1167315	497584	1	INV_TRANS	28
24	8267433	8631169	Chicken	28	2605109	2684477	363737	79369	-1	Normal	28
24	8961582	12645100	Chicken	28	1518990	2559746	3683519	1040757	1	INV	28
24	12728322	13713285	Chicken	28	1076240	1291550	984964	215311	-1	Normal	28
24	13902471	14515773	Chicken	28	352662	626550	613303	273889	1	INV	28
24	14584015	15599342	Chicken	28	910481	1074227	1015328	163747	1	INV_TRANS	28
24	15678011	16612854	Chicken	28	650114	872919	934844	222806	-1	TRANS	28
25	86171	2540936	Chicken	Z	8528449	9277874	2454766	749426	-1	TRANS	Z
25	3361011	4245263	Chicken	Z	7951754	8315318	884253	363565	1	INV_TRANS	Z
25	4489606	15394488	Chicken	Z	1100311	7869321	10904883	6769011	-1	TRANS	Z
25	19106223	19794041	Chicken	Z	20056	323800	687819	303745	1	INV_TRANS	Z
25	19865819	20513709	Chicken	Z	395466	582322	647891	186857	-1	TRANS	Z
25	21138278	21994514	Chicken	Z	707452	979280	856237	271829	1	INV_TRANS	Z
25	22009335	49826764	Chicken	Z	9300367	25436503	27817430	16136137	1	INV	Z
25	49976331	50184916	Chicken	Z	73239630	73341101	208586	101472	-1	TRANS	Z
25	50288287	61270163	Chicken	Z	57209069	64381517	10981877	7172449	-1	TRANS	Z
25	61422062	71245120	Chicken	Z	45793124	51717229	9823059	5924106	-1	TRANS	Z
25	72045197	72210867	Chicken	Z	78975312	79043252	165671	67941	1	INV_TRANS	Z
25	72566848	74805947	Chicken	Z	71784497	73124600	2239100	1340104	-1	TRANS	Z
25	76306707	77303283	Chicken	Z	81154255	81745309	996577	591055	1	INV_TRANS	Z
25	77582545	79165643	Chicken	Z	79148128	80312687	1583099	1164560	-1	TRANS	Z
25	79276747	80396848	Chicken	Z	56433394	57149986	1120102	716593	1	INV_TRANS	Z
25	80857631	98375099	Chicken	Z	34585741	45527752	17517469	10942012	-1	TRANS	Z
25	98622914	111213450	Chicken	Z	25516571	34284797	12590537	8768227	1	INV_TRANS	Z
25	111939559	117237903	Chicken	Z	67338061	70671563	5298345	3333503	1	INV_TRANS	Z
25	117506787	120801474	Chicken	Z	65283976	67260955	3294688	1976980	-1	TRANS	Z
25	122939113	124055892	Chicken	Z	81773986	82221500	1116780	447515	1	INV_TRANS	Z
25	124692879	126088204	Chicken	Z	52053809	52720539	1395326	666731	1	INV_TRANS	Z
25	126245898	126330708	Chicken	Z	71064059	71122998	84811	58940	1	INV_TRANS	Z
25	126547966	127273459	Chicken	Z	53207242	53631310	725494	424069	-1	TRANS	Z
25	128079042	132271975	Chicken	Z	53689809	56346990	4192934	2657182	1	INV_TRANS	Z
25	132351557	133217910	Chicken	Z	70687180	71007687	866354	320508	1	INV_TRANS	Z
1	107356	17725457	Pigeon	1	199665531	205473074	17618102	5807544	-1	Normal	1
1	17767562	20182803	Pigeon	1	198027648	199617669	2415242	1590022	1	INV	1
1	20474665	115484182	Pigeon	1	139384014	197878915	95009518	58494902	-1	Normal	1
1	115718288	170091560	Pigeon	1	88519364	123240076	54373273	34720713	1	INV	1
1	170273767	182093516	Pigeon	1	123296001	131334326	11819750	8038326	-1	TRANS	1
1	182107223	188622688	Pigeon	1	84137439	88382902	6515466	4245464	1	INV	1
1	188842285	200475533	Pigeon	1	131512722	139255369	11633249	7742648	-1	TRANS	1
1	200706893	206409560	Pigeon	1	81389531	84095189	5702668	2705659	-1	Normal	1
1	206477038	206588000	Pigeon	1	81300408	81366397	110963	65990	1	INV	1
1	206668394	207170214	Pigeon	1	80997451	81262919	501821	265469	1	INV	1
1	207495320	207599497	Pigeon	1	80853040	80922540	104178	69501	-1	Normal	1
1	209808062	211283444	Pigeon	1	79338913	79942660	1475383	603748	1	INV	1
1	211686624	212106170	Pigeon	1	80345111	80600081	419547	254971	-1	TRANS	1
1	212624622	212763203	Pigeon	1	80076959	80167289	138582	90331	1	INV_TRANS	1
1	212890869	233072657	Pigeon	1	65707717	78932132	20181789	13224416	1	INV	1
1	233229430	239541357	Pigeon	1	61585040	65643289	6311928	4058250	1	INV	1
1	239719992	245391570	Pigeon	1	57706693	61479250	5671579	3772558	1	INV	1
1	245394398	249473284	Pigeon	1	54893986	57613899	4078887	2719914	-1	Normal	1
1	249576573	280094055	Pigeon	1	36486622	54827288	30517483	18340667	1	INV	1
1	280144823	326083467	Pigeon	1	9201556	36464574	45938645	27263019	-1	Normal	1
1	326095075	326831054	Pigeon	1	8644320	9197031	735980	552712	1	INV	1
1	326997971	339734606	Pigeon	1	997668	8659499	12736636	7661832	-1	Normal	1
1	341159393	342074343	Pigeon	1	370497	662133	914951	291637	1	INV	1
1	343101845	344366012	Pigeon	1	77592	362381	1264168	284790	-1	Normal	1
2	745157	1080839	Pigeon	2	239368	342071	335683	102704	-1	INV_TRANS	2
2	2168601	2397273	Pigeon	2	52421	158547	228673	106127	1	Normal	2
2	4001839	100541986	Pigeon	2	569934	60637543	96540148	60067610	1	Normal	2
2	100883849	103156620	Pigeon	2	95524467	97058715	2272772	1534249	-1	INV_TRANS	2
2	103166710	104006196	Pigeon	2	60845921	61358124	839487	512204	-1	INV	2
2	104162550	121306941	Pigeon	2	83802595	95440148	17144392	11637554	-1	INV	2
2	121897670	126767265	Pigeon	2	80255890	83456510	4869596	3200621	1	TRANS	2
2	127314542	142047858	Pigeon	2	71999321	79936135	14733317	7936815	-1	INV_TRANS	2
2	142949870	143120735	Pigeon	2	97705271	97758373	170866	53103	1	TRANS	2
2	143790987	152163339	Pigeon	2	61405715	65612382	8372353	4206668	-1	INV_TRANS	2
2	152350262	153701036	Pigeon	2	97138694	97668360	1350775	529667	1	Normal	2
2	154084072	164135860	Pigeon	2	65640262	71805070	10051789	6164809	1	TRANS	2
2	164446313	169359111	Pigeon	2	98065405	100865630	4912799	2800226	1	Normal	2
2	169474076	169705406	Pigeon	2	100884502	101091564	231331	207063	-1	INV	2
2	169763116	171558569	Pigeon	2	101184793	102392811	1795454	1208019	1	Normal	2
2	171772994	174486400	Pigeon	2	103617177	105560302	2713407	1943126	-1	INV	2
2	174761909	177983452	Pigeon	2	107207044	109394149	3221544	2187106	1	Normal	2
2	178112505	179485826	Pigeon	2	102637087	103565683	1373322	928597	1	TRANS	2
2	179486570	181952682	Pigeon	2	105602385	107203453	2466113	1601069	-1	INV_TRANS	2
2	181974244	265683807	Pigeon	2	109425697	157134993	83709564	47709297	1	Normal	2
3	44440	347519	Pigeon	3	104854742	104977205	303080	122464	1	INV_TRANS	3
3	1284125	1595594	Pigeon	3	105676113	106105022	311470	428910	1	INV_TRANS	3
3	2458164	2789729	Pigeon	3	116284330	116363222	331566	78893	1	INV_TRANS	3
3	2983994	3545434	Pigeon	3	105353489	105633855	561441	280367	-1	TRANS	3
3	3810753	4148835	Pigeon	3	106215612	106422893	338083	207282	1	INV_TRANS	3
3	4289660	6000289	Pigeon	3	116454938	116988834	1710630	533897	1	INV	3
3	6014622	6398734	Pigeon	3	117064424	117211239	384113	146816	-1	TRANS	3
3	6755249	7196424	Pigeon	3	104215146	104463427	441176	248282	1	INV_TRANS	3
3	7740471	8036341	Pigeon	3	106440453	106644708	295871	204256	1	INV_TRANS	3
3	8149911	14681879	Pigeon	3	109793741	113494181	6531969	3700441	-1	Normal	3
3	15043047	19676202	Pigeon	3	106803358	109624293	4633156	2820936	1	INV	3
3	20115984	26082478	Pigeon	3	113552008	115879041	5966495	2327034	1	INV_TRANS	3
3	26140122	30869564	Pigeon	3	101594711	103991477	4729443	2396767	1	INV	3
3	31303024	32141969	Pigeon	3	115911472	116187103	838946	275632	-1	TRANS	3
3	32755882	54626680	Pigeon	3	88582911	101312155	21870799	12729245	1	INV	3
3	54650553	88300692	Pigeon	3	68236403	88497486	33650140	20261084	-1	Normal	3
3	88602710	99341619	Pigeon	3	61561545	68153785	10738910	6592241	1	INV	3
3	99441671	201124264	Pigeon	3	918055	61410078	101682594	60492024	-1	Normal	3
3	202900988	205154187	Pigeon	3	211049	565105	2253200	354057	1	INV	3
4	1681971	1970627	Pigeon	4	45804082	45903668	288657	99587	1	INV_TRANS	4
4	3598531	3900560	Pigeon	4	47963782	48076846	302030	113065	1	INV_TRANS	4
4	4202857	7902704	Pigeon	4	46406217	47941262	3699848	1535046	-1	TRANS	4
4	8180737	8484341	Pigeon	4	48544550	48703505	303605	158956	1	INV_TRANS	4
4	8772065	8922386	Pigeon	4	74213946	74268571	150322	54626	-1	TRANS	4
4	9767009	9899427	Pigeon	4	49506094	49577693	132419	71600	1	INV_TRANS	4
4	10443438	11490100	Pigeon	4	48771397	49378389	1046663	606993	-1	TRANS	4
4	11974491	13883514	Pigeon	4	74477685	75348553	1909024	870869	-1	Normal	4
4	14064915	16536071	Pigeon	4	49653639	50876981	2471157	1223343	1	INV_TRANS	4
4	16604842	17376980	Pigeon	4	51902951	52396150	772139	493200	1	INV_TRANS	4
4	17396406	17573872	Pigeon	4	52483813	52577073	177467	93261	-1	TRANS	4
4	17937721	19423496	Pigeon	4	50996563	51862552	1485776	865990	1	INV_TRANS	4
4	19575961	20009570	Pigeon	4	45920723	46164982	433610	244260	1	INV_TRANS	4
4	20438514	23150802	Pigeon	4	72917242	74162591	2712289	1245350	1	INV	4
4	23316787	56655436	Pigeon	4	52675850	72775900	33338650	20100051	-1	Normal	4
4	56764702	62629466	Pigeon	4	41678922	45325919	5864765	3646998	-1	Normal	4
4	62651697	62782763	Pigeon	4	41582814	41665647	131067	82834	1	INV	4
4	62982872	137146422	Pigeon	4	7973	41423644	74163551	41415672	-1	Normal	4
5	56323363	57423300	Pigeon	4a	19585983	19920292	1099938	334310	1	TRANS	4a
5	57531994	57766207	Pigeon	4a	8833848	8911030	234214	77183	-1	INV_TRANS	4a
5	58131669	58555026	Pigeon	4a	20187070	20255468	423358	68399	-1	INV_TRANS	4a
5	59678064	60744702	Pigeon	4a	20499639	20759282	1066639	259644	1	TRANS	4a
5	60866300	61120161	Pigeon	4a	20063387	20140218	253862	76832	-1	INV_TRANS	4a
5	61316837	61786201	Pigeon	4a	19356734	19545846	469365	189113	-1	INV_TRANS	4a
5	62863257	64089747	Pigeon	4a	2686946	3221053	1226491	534108	-1	INV	4a
5	64332196	64430075	Pigeon	4a	8944040	8997158	97880	53119	-1	INV	4a
5	64655398	73317529	Pigeon	4a	10699061	14309337	8662132	3610277	-1	INV	4a
5	73402420	74912253	Pigeon	4a	14321096	14945466	1509834	624371	1	Normal	4a
5	75164589	79424712	Pigeon	4a	135641	1715064	4260124	1579424	-1	INV_TRANS	4a
5	79956270	82546628	Pigeon	4a	17744340	19232197	2590359	1487858	-1	INV_TRANS	4a
5	82606292	84317743	Pigeon	4a	1740133	2627347	1711452	887215	1	TRANS	4a
5	84410155	89041749	Pigeon	4a	15021162	17712091	4631595	2690930	1	Normal	4a
5	89062617	91799462	Pigeon	4a	9011063	10690916	2736846	1679854	1	TRANS	4a
5	91952921	95518791	Pigeon	4a	3305216	5186836	3565871	1881621	-1	INV_TRANS	4a
5	95664744	102860641	Pigeon	4a	5301061	8831724	7195898	3530664	1	TRANS	4a
5	71128	1609550	Pigeon	9	12918089	13458884	1538423	540796	-1	INV_TRANS	9
5	1681140	7316812	Pigeon	9	4719353	7865964	5635673	3146612	-1	INV	9
5	7457664	16724579	Pigeon	9	7892179	12886096	9266916	4993918	1	Normal	9
5	16774885	28363754	Pigeon	9	114749	4659465	11588870	4544717	-1	INV_TRANS	9
5	28597313	49425742	Pigeon	9	13483553	24654245	20828430	11170693	1	Normal	9
5	49827256	50510465	Pigeon	9	26000796	26119106	683210	118311	-1	INV_TRANS	9
5	50639016	52915766	Pigeon	9	24662501	25450848	2276751	788348	-1	INV	9
5	53158671	54600844	Pigeon	9	25608077	25990077	1442174	382001	1	Normal	9
5	54628796	56219937	Pigeon	9	26141453	26512092	1591142	370640	1	Normal	9
6	1354355	7569065	Pigeon	5	165401	2295045	6214711	2129645	1	Normal	5
6	8293283	12233330	Pigeon	5	2612572	4569631	3940048	1957060	-1	INV	5
6	12607571	23401153	Pigeon	5	4650772	11393776	10793583	6743005	1	Normal	5
6	23458899	60841544	Pigeon	5	11359833	34504890	37382646	23145058	1	Normal	5
6	60857003	62003708	Pigeon	5	66069412	66475548	1146706	406137	1	TRANS	5
6	62117434	71508497	Pigeon	5	34811510	40481360	9391064	5669851	-1	INV	5
6	72440203	75600741	Pigeon	5	40667531	42424280	3160539	1756750	-1	INV	5
6	75869232	82545185	Pigeon	5	42757350	47123310	6675954	4365961	1	Normal	5
6	82723797	111157939	Pigeon	5	48318299	64968480	28434143	16650182	-1	INV	5
6	111313516	111628432	Pigeon	5	65921982	66028912	314917	106931	1	TRANS	5
6	111839077	113911611	Pigeon	5	47270434	48249115	2072535	978682	-1	INV_TRANS	5
6	114393955	116268631	Pigeon	5	66566856	66692742	1874677	125887	1	TRANS	5
6	116826567	118854080	Pigeon	5	65299966	65714083	2027514	414118	-1	INV	5
6	119385841	119941730	Pigeon	5	66748249	66851225	555890	102977	1	TRANS	5
6	120415291	120993175	Pigeon	5	65762575	65873133	577885	110559	1	Normal	5
7	52128449	54268125	Pigeon	6	21213056	22261585	2139677	1048530	1	TRANS	6
7	54495222	56337752	Pigeon	6	20143354	21176982	1842531	1033629	1	TRANS	6
7	56399815	59459255	Pigeon	6	17348902	18906335	3059441	1557434	1	TRANS	6
7	60251763	60610252	Pigeon	6	35405473	35482087	358490	76615	-1	INV_TRANS	6
7	60959069	64939871	Pigeon	6	22404238	24813269	3980803	2409032	1	TRANS	6
7	65125931	71967547	Pigeon	6	24828758	28622889	6841617	3794132	-1	INV_TRANS	6
7	72062669	85415154	Pigeon	6	28736385	35372698	13352486	6636314	1	TRANS	6
7	85421512	90178238	Pigeon	6	35608483	37854853	4756727	2246371	-1	INV_TRANS	6
7	90453823	92523865	Pigeon	6	19024276	20077738	2070043	1053463	1	TRANS	6
7	92712798	95957430	Pigeon	6	15393820	17216916	3244633	1823097	-1	INV_TRANS	6
7	96304667	124949637	Pigeon	6	151267	15320401	28644971	15169135	1	Normal	6
7	147576	1897792	Pigeon	12	4423362	5049517	1750217	626156	1	INV_TRANS	12
7	2035851	15614799	Pigeon	12	12997982	20991845	13578949	7993864	-1	Normal	12
7	15827535	19735199	Pigeon	12	28162	1323679	3907665	1295518	-1	TRANS	12
7	19955580	25846006	Pigeon	12	1352795	4295922	5890427	2943128	-1	Normal	12
7	25879788	28469179	Pigeon	12	11465547	12947970	2589392	1482424	-1	TRANS	12
7	28558369	34209438	Pigeon	12	6402199	6967002	5651070	564804	1	INV_TRANS	12
7	34265383	36826030	Pigeon	12	5101136	6333699	2560648	1232564	-1	TRANS	12
7	37038195	38794958	Pigeon	12	21065200	21818031	1756764	752832	1	INV_TRANS	12
7	39295128	41522460	Pigeon	12	7075481	8154920	2227333	1079440	1	INV_TRANS	12
7	41693102	44550406	Pigeon	12	8897356	10196189	2857305	1298834	-1	TRANS	12
7	44584108	45952986	Pigeon	12	10638051	11223431	1368879	585381	1	INV_TRANS	12
7	46236798	46713613	Pigeon	12	8701021	8852568	476816	151548	1	INV_TRANS	12
[truncated: 1,186 more rows]
