# Supplementary material for: A new emu genome illuminates the evolution of genome configuration and nuclear architecture of avian chromosomes
Source: HighWire-hosted journal article supplement (doi:10.1101/gr.271569.120), 2021-01-06
Supplement: Supplemental_Table_S7.xlsx [file Supplemental_Table_S7.xlsx]

## Sheet: Supplemental_Table_S7
Supplemental Table 7. Comparing GC and repeat contents, and gene density between chromosomes of emu and turtle
Chr	Chr_len	Emu_GC	Turtle_GC	Emu_Repeat	Turtle_Repeat	Emu_gene_density
1	216272475	0.400161	0.407856	0.0980676	0.35813	0.263699
2	165000027	0.39849	0.405337	0.0885434	0.34946	0.234434
3	129390489	0.402689	0.407573	0.0921178	0.34969	0.271386
4	84451203	0.401619	0.403742	0.0711469	0.33199	0.276763
Z	82723677	0.402274	0.40546	0.080256	0.33126	0.371441
5	72167472	0.415782	0.414408	0.0748559	0.3322	0.358534
6	42478111	0.421034	0.411975	0.0620251	0.31061	0.302017
7	45385597	0.417407	0.408789	0.0590026	0.30711	0.320149
8	37329370	0.423202	0.413805	0.0608655	0.30675	0.358879
9	31519428	0.430479	0.41735	0.0567272	0.30786	0.371168
10	25660581	0.439528	0.422663	0.0524422	0.29064	0.393018
4a	24535566	0.434303	0.41991	0.0558849	0.30786	0.343904
11	25096210	0.432647	0.418951	0.0622512	0.27936	0.356032
12	26098356	0.436819	0.42629	0.0584303	0.31061	0.307511
13	23196095	0.446073	0.424003	0.0578045	0.30675	0.367626
14	21258579	0.452173	0.429339	0.0577514	0.29064	0.428417
15	17715720	0.461161	0.434588	0.0549334	0.27682	0.453715
17	13331648	0.476421	0.442347	0.0511486	0.27655	0.426377
18	14766229	0.470037	0.437942	0.0663119	0.31118	0.4413
19	13299004	0.466047	0.430934	0.0492955	0.26757	0.536818
20	18556269	0.459878	0.430961	0.0631228	0.30081	0.419583
21	10049533	0.469254	0.445392	0.0497607	0.27539	0.499623
22	5568188	0.479726	0.445524	0.0398092	0.26421	0.476219
23	8892990	0.498962	0.455919	0.0808248	0.28186	0.454257
24	8478814	0.494296	0.449096	0.0491209	0.26651	0.3979
25	3435794	0.578567	0.459812	0.065841	0.29299	0.718179
26	7517663	0.507971	0.454319	0.0488704	0.27437	0.610932
27	6867657	0.517113	0.456715	0.0764186	0.27988	0.55339
28	6370545	0.5303	0.467176	0.0559398	0.27903	0.687041
